# Supplementary material for: Mapping the Tooth Enamel Proteome and Amelogenin Phosphorylation Onto Mineralizing Porcine Tooth Crowns
Source: Front Physiol. 2019 Jul 30;10:925. doi: 10.3389/fphys.2019.00925 (PMC6682599; doi:10.3389/fphys.2019.00925)
Supplement: Supplementary file 2 [file Table_1.xlsx]

## Sheet: 1 - Annotated with 100% Scale
	Supplemental Table 1: Protein abundance measurements From Frontiers in Phyiology, "Integrating microsampling and proteomics to map matrix proteins during tooth enamel mineralization." Daniel R. Green, Fabian Schulte, Kyu-Ha Lee, Megan K. Pugach, Markus Hardt, Felicitas B. Bidlack Full gene names and abbreviations are extracted or are entered manually when not available. Protein abundance values h…
										(enamel)	(enamel)	(enamel)	(edj)	(enamel)	(enamel)	(edj)	(enamel)	(enamel)	(edj)	(enamel)	(enamel)	(enamel)	(enamel)	(enamel)	(enamel)	(enamel+dentin)	(enamel)	(dentin)	(enamel+dentin)	(bone)
Protein Group	Protein ID	Accession	Uniprot acc	Protein	Significance	Coverage (%)	#Peptides	#Unique	PTM	m3_1A Area	m3_1B Area	m3_1C Area	m3_2A Area	m3_2B Area	m3_2C Area	m3_3A Area	m3_3B Area	m3_3C Area	m3_4A Area	m3_4B Area	m3_4C Area	m2_1A Area	m2_1B Area	m2_2A Area	m2_2B Area	m2_3A Area	m2_3B Area	m2_4A Area	m2_4B Area	m2_bone Area	Sample Profile (Ratio)	Avg. Mass	Description	Gene Name (uniprot)	Gn Abbreviation (uniprot)	Gn Abbreviation (manual)	Gene Name (manual)	Name Notes
344	9039	tr|A0A075B7I6|A0A075B7I6_PIG	A0A075B7I6	IGV	200	46	4	3	Deamidation (NQ)	29.6996	68.6163	43.6562	100	20.0208	32.4085	87.3163	0	0	86.1438	13.3132	45.9047	92.9529	20.4821	13.8122	6.65662	82.553	34.874	73.4245	99.3413	56.9078	3.87:1.30:10.01:1.00:2.84:6.72:0:0:7.60:0.52:0.65:0.89:0.81:0.70:6.37:2.13:7.92:5.66:1.46:1.69:9.31	12329	Immunoglobulin V-set (Fragment) OS=Sus scrofa PE=4 SV=1	Immunoglobulin V-set (Fragment)	IGV	IGV	Immunoglobulin V-set (Fragment)
101	8401	tr|A0A0C3SG01|A0A0C3SG01_PIG	A0A0C3SG01	APOA1	200	66	21	21	Oxidation (M); Deamidation (NQ); Pyro-glu from Q	21.1911	22.4007	43.8293	6.42832	18.3656	58.1477	52.6031	65.2954	96.9664	13.407	63.8495	100	31.4336	27.1326	19.004	25.898	24.6294	25.2614	12.8566	38.7331	68.4261	1.22:5.76:0.30:1.00:62.03:16.52:57.02:64.00:0.64:34.05:64.00:1.89:1.04:2.06:1.59:2.45:0.94:2.87:36.68:1.61:3.04	30330	Apolipoprotein A-I OS=Sus scrofa GN=APOA1 PE=3 SV=1	Apolipoprotein A-I	APOA1	APOA1	Apolipoprotein A-I
160	8515	tr|A0A0H5ANC0|A0A0H5ANC0_PIG	A0A0H5ANC0	OGN	200	42	11	11	Deamidation (NQ)	0	47.8887	0	82.1532	0	0	64.5918	0	0	88.8905	0	0	32.5346	29.1016	0	14.5508	0	37.8749	71.0631	98.4066	100	64.00:-:64.00:-:-:64.00:-:-:64.00:-:-:64.00:-:64.00:-:64.00:64.00:64.00:64.00:-:64.00	33986	Osteoglycin mimecan OS=Sus scrofa GN=OGN PE=2 SV=1	Osteoglycin mimecan	OGN	OGN	Osteoglycin mimecan
701	8915	tr|A0A140TAK6|A0A140TAK6_PIG	A0A140TAK6	AZU1	200	22	4	4	Deamidation (NQ)	0	0	0	69.7082	0	0	63.1262	0	0	74.1456	0	0	0	47.7509	0	39.2998	19.6499	0	76.3926	83.4954	100	-:-:64.00:-:-:64.00:-:-:64.00:-:-:64.00:-:64.00:64.00:-:64.00:64.00:64.00:-:-	24301	Azurocidin OS=Sus scrofa GN=AZU1 PE=4 SV=1	Azurocidin	AZU1	AZU1	Azurocidin
446	8911	tr|A0A140TAK8|A0A140TAK8_PIG	A0A140TAK8	APOH	200	14	5	5	Carbamidomethylation	0	76.7898	0	86.3552	33.95	41.6837	100	0	0	88.9109	44.2454	93.1506	55.9791	33.5797	0	12.2644	48.6987	0	55.5089	77.7188	24.5288	4.81:0:6.91:1.00:2.65:11.87:0:0:8.94:0.98:3.13:0.87:0:0.45:1.67:0:3.61:2.83:0.32:0:2.36	38275	apolipoprotein H OS=Sus scrofa GN=APOH PE=1 SV=1	apolipoprotein H	APOH	APOH	apolipoprotein H
1053	9130	tr|A0A173G6G6|A0A173G6G6_PIG	A0A173G6G6	SEPT11	15.85	7	2	2		0	0	0	0	0	0	0	0	0	0	0	0	0	0	0	0	0	50.8884	25.4442	100	77.1974	-:-:-:-:-:-:-:-:-:-:-:-:-:-:-:64.00:64.00:64.00:64.00:-:-	49371	Septin 11 OS=Sus scrofa PE=2 SV=1	Septin 11	SEPT11	SEPT11	Septin 11
295	8956	tr|A0FJ29|A0FJ29_PIG	A0FJ29	LTF	200	6	4	2		64.2203	49.3763	75.668	0	0	0	66.2472	0	0	0	0	0	63.6023	100	15.8151	85.2607	31.6302	0	0	0	0	64.00:64.00:-:-:-:64.00:-:-:-:-:-:64.00:64.00:64.00:64.00:-:-:-:-:64.00:64.00	75510	Lactoferrin OS=Sus scrofa PE=2 SV=1	Lactoferrin	LTF	LTF	Lactoferrin
1020	9209	tr|A0PA01|A0PA01_PIG	A0PA01	PI-9	22.33	11	3	2		7.35888	0	0	0	0	0	0	69.0809	0	0	44.0839	0	0	14.7178	0	0	100	0	0	0	0	-:-:-:-:-:-:64.00:-:-:64.00:-:64.00:-:-:64.00:-:-:-:-:64.00:-	42551	Serine protease inhibitor 9 OS=Sus scrofa GN=PI-9 PE=2 SV=1	Serine protease inhibitor 9	PI-9	PI-9	Serine protease inhibitor 9
98	8391	tr|A0SEG9|A0SEG9_PIG	A0SEG9	C9	200	35	25	25	Oxidation (M); Deamidation (NQ); Pyro-glu from Q	31.7341	66.9382	0	100	0	0	96.4285	0	0	98.537	0	0	86.8166	0	0	63.4681	78.7414	77.0282	90.2593	86.3837	95.4773	64.00:-:64.00:-:-:64.00:-:-:64.00:-:-:-:-:64.00:64.00:64.00:64.00:64.00:64.00:64.00:64.00	62226	Complement component C9 OS=Sus scrofa PE=2 SV=1	Complement component C9	C9	C9	Complement component C9
332	8501	tr|A1IU54|A1IU54_PIG	A1IU54	CPE	200	28	12	11		0	96.1256	25.072	100	0	15.6129	74.8718	55.8039	94.6023	95.8376	42.23	99.7871	61.8734	0	0	7.80645	52.6799	77.8685	81.2167	97.2315	87.7879	64.00:64.00:64.00:-:64.00:64.00:64.00:64.00:64.00:64.00:64.00:-:-:64.00:64.00:64.00:64.00:64.00:64.00:-:64.00	53223	Carboxypeptidase E OS=Sus scrofa GN=CPE PE=2 SV=1	Carboxypeptidase E	CPE	CPE	Carboxypeptidase E
990	9166	tr|A1X898|A1X898_PIG	A1X898	P4HA1	200	8	3	3		0	0	0	17.8477	0	0	11.3533	0	0	53.4596	0	0	41.0674	0	0	0	0	5.67667	80.6905	100	87.9982	-:-:64.00:-:-:64.00:-:-:64.00:-:-:-:-:-:-:64.00:64.00:64.00:64.00:-:64.00	60935	Procollagen-proline 2-oxoglutarate-4-dioxygenase OS=Sus scrofa GN=P4HA1 PE=1 SV=1	Procollagen-proline 2-oxoglutarate-4-dioxygenase	P4HA1	P4HA1	Procollagen-proline 2-oxoglutarate-4-dioxygenase
565	9027	tr|A1Z1R6|A1Z1R6_PIG	A1Z1R6	ITGAV	200	9	3	3		1.28916	42.6371	0	0	0	0	0	0	0	0	0	0	0	2.57832	0	36.8308	0	100	78.3607	97.3803	0	64.00:-:-:-:-:-:-:-:-:-:-:64.00:-:64.00:-:64.00:64.00:64.00:-:64.00:-	92112	Integrin alpha V (Fragment) OS=Sus scrofa GN=ITGAV PE=2 SV=1	Integrin alpha V (Fragment)	ITGAV	ITGAV	Integrin alpha V (Fragment)
903	9193	tr|A3EX84|A3EX84_PIG	A3EX84	LGALS3	200	14	3	3		0	87.0699	66.8212	0	0	0	0	0	0	0	26.913	0	53.826	65.4562	0	83.0883	0	93.8531	57.9493	100	0	64.00:64.00:-:-:-:-:-:-:-:64.00:-:64.00:-:64.00:-:64.00:64.00:64.00:-:-:64.00	27215	Galectin 3 OS=Sus scrofa GN=LGALS3 PE=1 SV=1	Galectin 3	LGALS3	LGALS3	Galectin 3
1248	9471	tr|A3RIE0|A3RIE0_PIG	A3RIE0	SPARCL-1	200	4	2	2		0	0	0	0	0	0	0	0	0	0	0	0	0	21.8137	0	0	0	0	0	43.6274	100	-:-:-:-:-:-:-:-:-:-:-:64.00:-:-:-:-:-:64.00:64.00:-:-	75259	SPARC like 1 OS=Sus scrofa PE=2 SV=1	SPARC like 1	SPARCL-1	SPARCL-1	SPARC like 1
100	8510	tr|A5A759|A5A759_PIG	A5A759	KRT2A	200	19	15	6	Carbamidomethylation; Deamidation (NQ)	52.5343	71.3384	94.2866	34.0605	49.1561	49.8252	20.0165	27.6774	79.4812	11.6863	30.5452	84.7116	41.568	69.1721	82.4495	56.7393	100	25.8671	5.84313	35.1539	40.7262	2.08:3.77:0.46:1.00:1.99:0.26:0.41:0.84:0.22:0.31:1.19:1.95:3.70:1.44:6.95:0.53:0.27:0.28:0.33:1.43:0.72	65866	Keratin 2A OS=Sus scrofa GN=KRT2A PE=2 SV=1	Keratin 2A	KRT2A	KRT2A	Keratin 2A
617	9133	tr|A5A766|A5A766_PIG	A5A766	GPNMB	200	9	3	3	Deamidation (NQ)	0	100	70.11	27.642	0	65.9872	0	0	98.5467	0	0	0	35.0476	0	0	0	13.821	68.992	0	0	0	64.00:64.00:64.00:-:64.00:-:-:64.00:-:-:-:-:-:-:64.00:64.00:-:-:-:-:64.00	61658	Glycoprotein NMB OS=Sus scrofa GN=GPNMB PE=2 SV=1	Glycoprotein NMB	GPNMB	GPNMB	Glycoprotein NMB
122	8439	tr|A5D9K7|A5D9K7_PIG	A5D9K7	COL11A2	200	9	14	12	Deamidation (NQ); Pyro-glu from Q	0	30.1556	13.2315	91.4906	0	6.61573	83.5855	0	0	100	60.6342	0	71.2204	53.8974	0	0	64.7842	0	91.4906	79.5714	70.877	64.00:64.00:64.00:-:64.00:64.00:-:-:64.00:64.00:-:64.00:-:-:64.00:-:64.00:64.00:64.00:-:64.00	162460	Collagen type XI alpha 2 OS=Sus scrofa GN=COL11A2 PE=4 SV=1	Collagen type XI alpha 2	COL11A2	COL11A2	Collagen type XI alpha 2
1065	9295	tr|A6M928|A6M928_PIG	A6M928	EIF4A1	37.56	8	2	2		0	0	0	0	0	0	0	0	0	0	0	0	0	0	0	0	50	0	0	100	0	-:-:-:-:-:-:-:-:-:-:-:-:-:-:64.00:-:-:64.00:-:-:-	46154	Eukaryotic translation initiation factor 4A isoform 1 OS=Sus scrofa GN=EIF4A1 PE=1 SV=1	Eukaryotic translation initiation factor 4A isoform 1	EIF4A1	EIF4A1	Eukaryotic translation initiation factor 4A isoform 1
1130	9126	tr|A7E1T5|A7E1T5_PIG	A7E1T5	HMGB1	200	23	3	3	Carbamidomethylation	53.5385	14.2433	24.0754	0	0	0	0	0	0	5.28124	0	0	0	100	0	30.3907	0	2.64062	28.321	81.0788	63.4503	64.00:64.00:-:-:-:-:-:-:64.00:-:-:64.00:-:64.00:-:64.00:64.00:64.00:64.00:64.00:-	22138	high mobility group box 1 (Fragment) OS=Sus scrofa PE=2 SV=1	high mobility group box 1 (Fragment)	HMGB1	HMGB1	high mobility group box 1 (Fragment)
1101	9279	tr|A8U4R4|A8U4R4_PIG	A8U4R4	tkt	79.67	8	3	3		87.8832	82.792	96.8095	69.1778	50.1512	55.7825	0	0	0	66.3091	0	0	72.0614	64.0753	89.1648	70.3774	100	49.7468	0	24.8734	0	3.70:5.04:1.97:1.00:2.49:0:0:0:2.02:0:0:1.64:5.61:2.63:8.53:1.33:0:0.16:0:6.76:2.59	67838	Transketolase OS=Sus scrofa GN=tkt PE=1 SV=1	Transketolase	tkt	tkt	Transketolase
415	9059	tr|B0LFE9|B0LFE9_PIG	B0LFE9	C4BP	200	5	4	4	Deamidation (NQ)	65.4904	86.9441	22.8937	74.6427	0	0	55.3897	0	0	45.7875	58.2997	0	91.3081	74.6216	0	59.2414	0	55.5456	87.1648	98.4783	100	64.00:64.00:64.00:-:-:64.00:-:-:64.00:64.00:-:64.00:-:64.00:-:64.00:64.00:64.00:64.00:64.00:64.00	192507	Complement component 4 OS=Sus scrofa PE=2 SV=1	Complement component 4	C4BP	C4BP	Complement component 4
1043	9737	tr|B0LUW3|B0LUW3_PIG	B0LUW3	RARRES2	200	12	3	3		0	79.4211	0	100	0	0	91.7292	0	0	96.4292	0	0	72.6641	0	0	81.2105	36.3321	86.5742	91.5801	0	0	64.00:-:64.00:-:-:64.00:-:-:64.00:-:-:-:-:64.00:64.00:64.00:64.00:-:-:-:64.00	18698	Chemerin OS=Sus scrofa PE=2 SV=1	Chemerin	RARRES2	RARRES2	Chemerin
635	8908	tr|B3F0B7|B3F0B7_PIG	B3F0B7	CRABP1	200	34	6	5		0	76.0631	70.6588	80.6284	0	0	73.1607	0	0	70.4447	0	0	63.5458	0	24.1044	48.2087	54.2637	70.7945	55.8181	100	49.928	64.00:64.00:64.00:-:-:64.00:-:-:64.00:-:-:-:64.00:64.00:64.00:64.00:64.00:64.00:64.00:-:64.00	15566	Cellular retinoic acid-binding protein 1 OS=Sus scrofa GN=CRABP1 PE=1 SV=1	Cellular retinoic acid-binding protein 1	CRABP1	CRABP1	Cellular retinoic acid-binding protein 1
368	8635	tr|B3VFB6|B3VFB6_PIG	B3VFB6	CALB1	200	39	8	7	Deamidation (NQ)	69.4861	92.5137	100	0	0	0	34.5691	0	0	0	0	0	77.0237	69.1381	0	0	0	0	0	0	0	64.00:64.00:-:-:-:64.00:-:-:-:-:-:64.00:-:-:-:-:-:-:-:64.00:64.00	29974	Calbindin 1 OS=Sus scrofa GN=CALB1 PE=1 SV=1	Calbindin 1	CALB1	CALB1	Calbindin 1
579	9244	tr|B5APU3|B5APU3_PIG	B5APU3	ACTR2	200	9	2	2		0	0	0	0	0	0	0	0	0	0	0	0	0	0	0	0	0	0	0	100	50	-:-:-:-:-:-:-:-:-:-:-:-:-:-:-:-:-:64.00:64.00:-:-	44761	ARP2 actin related protein 2 homolog OS=Sus scrofa GN=ACTR2 PE=1 SV=1	ARP2 actin related protein 2 homolog	ACTR2	ACTR2	ARP2 actin related protein 2 homolog
835	9530	tr|B5APU7|B5APU7_PIG	B5APU7	ARPC2	200	12	2	2		0	75.9129	0	26.8816	0	53.7631	0	0	0	0	0	0	0	0	0	0	0	62.0503	0	100	84.8214	64.00:-:64.00:-:64.00:-:-:-:-:-:-:-:-:-:-:64.00:-:64.00:64.00:-:-	34279	Arp2 3 complex 34 kDa subunit OS=Sus scrofa PE=2 SV=1	Arp2 3 complex 34 kDa subunit	ARPC2	ARPC2	Arp2 3 complex 34 kDa subunit
1044	9600	tr|C0JPM4|C0JPM4_PIG	C0JPM4	TIMP-2	200	12	3	3		68.706	0	0	92.8416	0	0	80.9576	34.353	0	100	0	0	0	85.5513	75.6244	98.3598	0	81.4493	99.1286	88.6599	0	-:-:64.00:-:-:64.00:64.00:-:64.00:-:-:64.00:64.00:64.00:-:64.00:64.00:64.00:-:64.00:-	24506	TIMP metallopeptidase inhibitor 2 OS=Sus scrofa GN=TIMP-2 PE=1 SV=1	TIMP metallopeptidase inhibitor 2	TIMP-2	TIMP-2	TIMP metallopeptidase inhibitor 2
166	8340	tr|C0MHR2|C0MHR2_PIG	C0MHR2	CLTC	200	21	25	25	Deamidation (NQ)	0	87.145	0	100	0	19.6413	40.1081	0	41.1039	76.4831	0	0	34.8526	39.9645	0	25.6621	9.82067	42.9098	80.8406	96.481	99.6397	64.00:-:64.00:-:64.00:64.00:-:64.00:64.00:-:-:64.00:-:64.00:64.00:64.00:64.00:64.00:64.00:-:64.00	191613	Clathrin heavy chain OS=Sus scrofa GN=CLTC PE=2 SV=1	Clathrin heavy chain	CLTC	CLTC	Clathrin heavy chain
486	9010	tr|C3S7K6|C3S7K6_PIG	C3S7K6	S100A9	200	32	4	4	Oxidation (M); Pyro-glu from Q	100	0	0	6.1062	0	0	13.7791	0	0	3.0531	0	0	0	99.8241	0	85.0141	0	0	23.3822	0	0	-:-:64.00:-:-:64.00:-:-:64.00:-:-:64.00:-:64.00:-:-:64.00:-:-:64.00:-	15893	Calcium-binding protein A9 OS=Sus scrofa GN=S100A9 PE=1 SV=1	Calcium-binding protein A9	S100A9	S100A9	Calcium-binding protein A9
610	9015	tr|C8C420|C8C420_PIG	C8C420	SLC25A3	123.03	11	4	4	Deamidation (NQ)	0	77.9411	0	0	0	0	0	0	0	0	0	0	0	38.9705	0	95.0354	0	100	0	0	0	64.00:-:-:-:-:-:-:-:-:-:-:64.00:-:64.00:-:64.00:-:-:-:-:-	39990	Solute carrier family 25 member 3 OS=Sus scrofa GN=SLC25A3 PE=2 SV=1	Solute carrier family 25 member 3	SLC25A3	SLC25A3	Solute carrier family 25 member 3
951	9346	tr|C9VZX5|C9VZX5_PIG	C9VZX5	MMP10	39.22	3	2	2		0	68.9507	0	0	0	0	0	0	0	0	0	0	0	66.399	0	18.3945	0	46.8217	36.7889	100	0	64.00:-:-:-:-:-:-:-:-:-:-:64.00:-:64.00:-:64.00:64.00:64.00:-:-:-	54127	Matrix metallopeptidase 10 OS=Sus scrofa GN=MMP10 PE=2 SV=1	Matrix metallopeptidase 10	MMP10	MMP10	Matrix metallopeptidase 10
199	8488	tr|D0G7F6|D0G7F6_PIG	D0G7F6	TPI1	200	54	12	12	Deamidation (NQ)	30.866	93.6877	99.6088	62.3269	0	72.6635	53.6879	0	63.4191	69.2936	48.8168	44.4571	84.5055	44.7761	13.985	57.9936	41.6582	6.99249	82.2102	100	75.7569	64.00:64.00:64.00:-:64.00:64.00:-:64.00:64.00:64.00:64.00:64.00:64.00:64.00:64.00:64.00:64.00:64.00:64.00:64.00:64.00	26668	Triosephosphate isomerase OS=Sus scrofa GN=TPI1 PE=1 SV=1	Triosephosphate isomerase	TPI1	TPI1	Triosephosphate isomerase
627	135	D2SW95|COPB_PIG	D2SW95	COPB1	200	7	3	3		0	1.32807	0	0	0	0	0	0	0	2.65614	0	0	0	0	0	0	0	0	63.6419	100	22.4988	64.00:-:-:-:-:-:-:-:64.00:-:-:-:-:-:-:-:64.00:64.00:64.00:-:-	107123	Coatomer subunit beta OS=Sus scrofa GN=COPB1 PE=2 SV=1	Coatomer subunit beta	COPB1	COPB1	Coatomer subunit beta
785	9427	tr|D7RK08|D7RK08_PIG	D7RK08	TFRC	23.9	3	2	2		0	100	0	0	0	0	0	0	0	0	0	0	0	0	0	30.6234	0	61.2469	0	0	0	64.00:-:-:-:-:-:-:-:-:-:-:-:-:64.00:-:64.00:-:-:-:-:-	86092	Transferrin receptor protein OS=Sus scrofa GN=TFRC PE=4 SV=1	Transferrin receptor protein	TFRC	TFRC	Transferrin receptor protein
226	8419	tr|E1CAJ5|E1CAJ5_PIG	E1CAJ5	grp-58	200	31	13	13		68.8798	92.1296	65.9753	84.2485	23.0935	0	63.923	0	0	87.2528	0	0	72.7086	0	75.7496	76.4385	46.187	84.5658	98.5892	99.7109	100	64.00:27.12:64.00:1.00:0:30.23:0:0:64.00:0:0:0:64.00:64.00:7.00:64.00:64.00:64.00:64.00:64.00:64.00	56859	Protein disulfide-isomerase OS=Sus scrofa GN=grp-58 PE=1 SV=1	Protein disulfide-isomerase	grp-58	grp-58	Protein disulfide-isomerase
331	8689	tr|E1CAJ6|E1CAJ6_PIG	E1CAJ6	pdi-p5	200	18	6	6	Deamidation (NQ)	73.8798	66.4548	65.9487	93.279	48.2932	0	44.0048	10.9078	34.1266	80.788	0	78.5346	46.2249	21.8155	70.4096	74.5348	62.793	100	73.2752	95.451	96.896	2.72:1.91:14.52:1.00:0:0.63:0.09:0.10:7.67:0:1.97:0.16:3.99:5.61:2.30:35.58:7.38:9.62:10.17:6.32:0.85	48074	Protein disulfide isomerase P5 OS=Sus scrofa GN=pdi-p5 PE=1 SV=1	Protein disulfide isomerase P5	pdi-p5	pdi-p5	Protein disulfide isomerase P5
537	8799	tr|E7EI20|E7EI20_PIG	E7EI20	ARHGDIA	200	43	6	6	Carbamidomethylation; Oxidation (M)	17.8665	62.5219	69.1466	0	8.93323	58.4113	0	74.8495	84.8661	0	75.7495	100	51.6178	68.7694	0	27.7554	0	0	59.6355	80.8521	49.3965	57.88:64.00:0:1.00:64.00:0:64.00:64.00:0:64.00:64.00:64.00:0:4.68:0:0:64.00:64.00:11.24:2.52:27.83	23394	Rho GDP dissociation inhibitor alpha OS=Sus scrofa GN=ARHGDIA PE=2 SV=1	Rho GDP dissociation inhibitor alpha	ARHGDIA	ARHGDIA	Rho GDP dissociation inhibitor alpha
1084	9416	tr|E9LT09|E9LT09_PIG	E9LT09	BMP3	200	5	2	2		0	0	0	16.4487	0	0	0	0	0	0	0	0	0	4.34335	0	1.94356	0	0	3.88711	0	100	-:-:64.00:-:-:-:-:-:-:-:-:64.00:-:64.00:-:-:64.00:-:64.00:-:-	53015	Bone morphogenetic protein 3 OS=Sus scrofa GN=BMP3 PE=2 SV=1	Bone morphogenetic protein 3	BMP3	BMP3	Bone morphogenetic protein 3
254	8553	tr|F1RF11|F1RF11_PIG	F1RF11	MMP2	200	22	11	10	Deamidation (NQ)	0	0	0	95.3768	0	22.9705	87.1229	0	0	100	0	0	73.7568	41.8993	0	0	11.4852	29.4407	92.9484	69.9256	75.7813	-:-:64.00:-:64.00:64.00:-:-:64.00:-:-:64.00:-:-:64.00:64.00:64.00:64.00:64.00:-:64.00	73756	MMP2 OS=Sus scrofa GN=MMP2 PE=1 SV=2	MMP2	MMP2	MMP2	MMP2
714	8804	tr|F1RF77|F1RF77_PIG	F1RF77	PLOD1	200	11	5	5	Deamidation (NQ)	0	0	0	83.9411	0	0	0	0	0	55.8675	0	0	0	0	0	47.861	23.9305	60.6368	72.0609	100	0	-:-:64.00:-:-:-:-:-:64.00:-:-:-:-:64.00:64.00:64.00:64.00:64.00:-:-:-	87914	Procollagen-lysine 2-oxoglutarate 5-dioxygenase 1 OS=Sus scrofa GN=PLOD1 PE=1 SV=2	Procollagen-lysine 2-oxoglutarate 5-dioxygenase 1	PLOD1	PLOD1	Procollagen-lysine 2-oxoglutarate 5-dioxygenase 1
659	9281	tr|F1RFI1|F1RFI1_PIG	F1RFI1	TUFM	200	6	2	2		69.3048	68.9408	19.9506	0	0	0	0	0	39.9011	0	0	0	0	100	0	83.4759	0	44.3083	0	0	0	64.00:64.00:-:-:-:-:-:64.00:-:-:-:64.00:-:64.00:-:64.00:-:-:-:64.00:-	49451	Elongation factor Tu OS=Sus scrofa GN=TUFM PE=1 SV=1	Elongation factor Tu	TUFM	TUFM	Elongation factor Tu
887	8925	tr|F1RFX9|F1RFX9_PIG	F1RFX9	SLC25A11	200	14	4	4		0	80.4048	0	87.1633	0	0	0	0	0	100	0	0	25.1826	0	0	58.2731	76.6816	62.0555	50.3652	67.7801	61.1252	64.00:-:64.00:-:-:-:-:-:64.00:-:-:-:-:64.00:64.00:64.00:64.00:64.00:64.00:-:64.00	33305	Solute carrier family 25 member 11 OS=Sus scrofa GN=SLC25A11 PE=1 SV=1	Solute carrier family 25 member 11	SLC25A11	SLC25A11	Solute carrier family 25 member 11
435	9001	tr|F1RFY1|F1RFY1_PIG	F1RFY1	PFN1	200	30	3	3	Deamidation (NQ)	0	80.4356	91.5268	31.4358	40.9366	57.2061	0	0	0	0	0	0	75.3859	35.512	66.7644	84.3689	15.7179	54.4591	82.7514	100	76.9038	15.23:24.86:0.42:1.00:6.32:0:0:0:0:0:0:0.59:6.43:25.12:0.15:3.59:31.71:35.73:6.40:0:11.91	15043	Profilin OS=Sus scrofa GN=PFN1 PE=1 SV=1	Profilin	PFN1	PFN1	Profilin
828	9822	tr|F1RGE8|F1RGE8_PIG	F1RGE8	ANKHD1	16.27	1	2	2		0	0	0	0	0	0	0	0	0	0	0	0	0	100	0	0	0	0	44.3241	88.6483	0	-:-:-:-:-:-:-:-:-:-:-:64.00:-:-:-:-:64.00:64.00:-:-:-	269233	ankyrin repeat and KH domain containing 1 OS=Sus scrofa GN=ANKHD1 PE=4 SV=2	ankyrin repeat and KH domain containing 1	ANKHD1	ANKHD1	ankyrin repeat and KH domain containing 1
439	8791	tr|F1RGJ2|F1RGJ2_PIG	F1RGJ2	CTNNA1	42.21	5	2	2		0	0	0	0	0	0	0	0	0	0	0	0	0	0	0	0	0	41.7038	0	100	83.4076	-:-:-:-:-:-:-:-:-:-:-:-:-:-:-:64.00:-:64.00:64.00:-:-	100104	Catenin alpha 1 OS=Sus scrofa GN=CTNNA1 PE=1 SV=2	Catenin alpha 1	CTNNA1	CTNNA1	Catenin alpha 1
519	8606	tr|F1RGJ3|F1RGJ3_PIG	F1RGJ3	HSPA9	82.76	13	7	6		0	100	0	0	0	0	0	0	0	0	0	0	0	29.3982	0	95.9642	0	58.7965	0	0	0	64.00:-:-:-:-:-:-:-:-:-:-:64.00:-:64.00:-:64.00:-:-:-:-:-	73651	Heat shock protein family A (Hsp70) member 9 OS=Sus scrofa GN=HSPA9 PE=1 SV=2	Heat shock protein family A (Hsp70) member 9	HSPA9	HSPA9	Heat shock protein family A (Hsp70) member 9
563	8981	tr|F1RGP1|F1RGP1_PIG	F1RGP1	MYBBP1A	200	5	4	3		0	0	0	0	0	0	0	0	0	45.5462	0	0	0	0	0	0	22.7731	0	67.5733	100	70.9743	-:-:-:-:-:-:-:-:64.00:-:-:-:-:-:64.00:-:64.00:64.00:64.00:-:-	151766	MYB binding protein 1a OS=Sus scrofa GN=MYBBP1A PE=1 SV=1	MYB binding protein 1a	MYBBP1A	MYBBP1A	MYB binding protein 1a
572	8991	tr|F1RH41|F1RH41_PIG	F1RH41	MYH14	90.97	8	2	2		0	87.6982	0	0	0	0	0	0	0	0	0	0	0	25.9257	51.8515	53.7364	0	100	0	0	0	64.00:-:-:-:-:-:-:-:-:-:-:64.00:64.00:64.00:-:64.00:-:-:-:-:-	52141	Uncharacterized protein OS=Sus scrofa PE=1 SV=1	obsolete	MYH14	MYH14	Myosin heavy chain 14	Uniprot listed as obsolete, NIH Smart Blast associates with myosin-14
151	8429	tr|F1RHA7|F1RHA7_PIG	F1RHA7	TGFBI	200	36	14	2	Carbamidomethylation; Deamidation (NQ)	0	0	0	100	0	0	82.9528	0	0	92.4182	0	0	0	0	0	41.4764	0	0	0	0	86.248	-:-:64.00:-:-:64.00:-:-:64.00:-:-:-:-:64.00:-:-:-:-:64.00:-:-	66767	Transforming growth factor-beta-induced protein ig-h3 OS=Sus scrofa GN=TGFBI PE=1 SV=2	Transforming growth factor-beta-induced protein ig-h3	TGFBI	TGFBI	Transforming growth factor-beta-induced protein ig-h3
848	9301	tr|F1RI01|F1RI01_PIG	F1RI01	RPL13A	113.4	8	2	2		0	39.5257	0	0	0	0	0	0	0	0	0	0.46545	0	0	0	0.9309	0	23.5226	39.597	100	56.4817	64.00:-:-:-:-:-:-:-:-:-:64.00:-:-:64.00:-:64.00:64.00:64.00:64.00:-:-	23709	60S ribosomal protein L13a OS=Sus scrofa GN=RPL13A PE=1 SV=1	60S ribosomal protein L13a	RPL13A	RPL13A	60S ribosomal protein L13a
245	8393	tr|F1RI39|F1RI39_PIG	F1RI39	ACTN4	200	22	15	8		23.3138	77.3378	0	91.7798	0	8.67979	85.6267	0	0	61.1241	0	0	84.7817	65.841	0	17.3596	38.7697	20.4402	73.7251	69.0787	100	64.00:-:64.00:-:64.00:64.00:-:-:64.00:-:-:64.00:-:64.00:64.00:64.00:64.00:64.00:64.00:64.00:64.00	101837	Actinin alpha 4 OS=Sus scrofa GN=ACTN4 PE=1 SV=2	Actinin alpha 4	ACTN4	ACTN4	Actinin alpha 4
585	8629	tr|F1RIH8|F1RIH8_PIG	F1RIH8	CA6	200	31	7	7	Deamidation (NQ)	66.1543	30.4166	14.7365	0	0	0	0	0	0	0	0	0	0	100	0	0	0	29.473	0	0	0	64.00:64.00:-:-:-:-:-:-:-:-:-:64.00:-:-:-:64.00:-:-:-:64.00:-	36312	Carbonic anhydrase VI OS=Sus scrofa GN=CA6 PE=4 SV=1	Carbonic anhydrase VI	CA6	CA6	Carbonic anhydrase VI
301	8489	tr|F1RIP6|F1RIP6_PIG	F1RIP6	NUCB1	200	26	9	9	Deamidation (NQ)	85.8059	88.8172	95.172	66.5615	69.6818	62.3715	57.0008	0	0	73.8745	12.338	24.676	42.5992	93.0583	96.5714	82.783	83.4865	100	55.6358	54.1825	95.0351	1.69:1.55:0.75:1.00:1.49:0.53:0:0:1.14:0.08:0.06:2.01:2.56:1.70:1.50:3.95:0.92:0.28:1.15:2.22:0.37	53202	Nucleobindin 1 OS=Sus scrofa GN=NUCB1 PE=1 SV=2	Nucleobindin 1	NUCB1	NUCB1	Nucleobindin 1
699	9082	tr|F1RJ25|F1RJ25_PIG	F1RJ25	ALDOC	200	10	3	3		46.464	100	93.3997	0	0	98.9812	0	0	56.1757	0	0	0	87.9029	0	0	75.2147	0	0	23.232	99.3636	90.6846	64.00:64.00:-:-:64.00:-:-:64.00:-:-:-:-:-:64.00:-:-:64.00:64.00:64.00:64.00:64.00	39377	Fructose-bisphosphate aldolase OS=Sus scrofa GN=ALDOC PE=1 SV=2	Fructose-bisphosphate aldolase	ALDOC	ALDOC	Fructose-bisphosphate aldolase
523	8736	tr|F1RJ93|F1RJ93_PIG	F1RJ93	TAGLN2	200	26	4	4	Oxidation (M)	0	79.6489	83.9274	0	0	27.7422	0	0	0	0	0	0	61.8453	39.5163	68.6435	64.6927	13.8711	49.143	82.3069	100	69.6666	64.00:64.00:-:-:64.00:-:-:-:-:-:-:64.00:64.00:64.00:64.00:64.00:64.00:64.00:64.00:-:64.00	23302	Transgelin OS=Sus scrofa GN=TAGLN2 PE=1 SV=1	Transgelin	TAGLN2	TAGLN2	Transgelin
578	9202	tr|F1RJF7|F1RJF7_PIG	F1RJF7	SDF4	200	11	4	4	Deamidation (NQ)	0	0	0	83.0139	0	0	76.0999	0	71.6746	100	0	0	0	0	0	0	0	0	48.6116	0	24.3058	-:-:64.00:-:-:64.00:-:64.00:64.00:-:-:-:-:-:-:-:64.00:-:64.00:-:-	41464	Stromal cell derived factor 4 OS=Sus scrofa GN=SDF4 PE=1 SV=2	Stromal cell derived factor 4	SDF4	SDF4	Stromal cell derived factor 4
1063	9341	tr|F1RJI1|F1RJI1_PIG	F1RJI1	MLEC	44.87	10	2	2		0	0	0	0	0	0	0	4.7781	0	0	0	49.8583	0	0	0	9.5562	0	0	64.8688	100	0	-:-:-:-:-:-:64.00:-:-:-:64.00:-:-:64.00:-:-:64.00:64.00:-:-:-	32201	Malectin OS=Sus scrofa GN=MLEC PE=1 SV=1	Malectin	MLEC	MLEC	Malectin
1003	9089	tr|F1RJT3|F1RJT3_PIG	F1RJT3	DPYSL	200	8	3	3		0	0	0	0	0	0	0	0	51.9495	0	0	0	0	31.7026	0	37.6413	0	0	15.8513	100	0	-:-:-:-:-:-:-:64.00:-:-:-:64.00:-:64.00:-:-:64.00:64.00:-:-:-	53487	dihydropyrimidinase like 3 OS=Sus scrofa GN=LOC100525453 PE=1 SV=2	dihydropyrimidinase like 3	LOC100525453	DPYSL	dihydropyrimidinase like 3
752	9251	tr|F1RK01|F1RK01_PIG	F1RK01	CPB2	200	8	2	2		63.3044	12.5561	4.52299	100	6.18165	2.2615	48.9522	0	0	93.6575	39.919	0	70.8394	60.642	59.5115	0	39.9141	18.8874	80.8819	23.1642	0	1.18:0.58:64.00:1.00:1.59:7.12:0:0:64.00:3.49:0:13.43:14.18:0:4.99:2.54:63.84:1.14:0:21.91:24.76	48875	Carboxypeptidase B2 OS=Sus scrofa GN=CPB2 PE=1 SV=2	Carboxypeptidase B2	CPB2	CPB2	Carboxypeptidase B2
491	8712	tr|F1RK02|F1RK02_PIG	F1RK02	LCP1	16.12	8	4	2	Deamidation (NQ)	0	0	0	0	0	0	0	0	0	0	0	0	0	100	0	50	0	0	0	0	0	-:-:-:-:-:-:-:-:-:-:-:64.00:-:64.00:-:-:-:-:-:-:-	71415	Lymphocyte cytosolic protein 1 OS=Sus scrofa GN=LCP1 PE=1 SV=2	Lymphocyte cytosolic protein 1	LCP1	LCP1	Lymphocyte cytosolic protein 1
448	8989	tr|F1RKG8|F1RKG8_PIG	F1RKG8	PEBP1	200	36	6	6		53.4561	97.5839	100	74.0422	20.104	82.2317	73.4888	0	40.2079	90.1036	0	90.214	73.2196	90.0919	58.1963	83.5325	45.6588	85.225	69.656	91.079	0	64.00:64.00:64.00:1.00:64.00:64.00:0:1.45:64.00:0:64.00:64.00:27.60:64.00:8.60:64.00:64.00:64.00:0:23.22:64.00	20972	Phosphatidylethanolamine binding protein 1 OS=Sus scrofa GN=PEBP1 PE=1 SV=1	Phosphatidylethanolamine binding protein 1	PEBP1	PEBP1	Phosphatidylethanolamine binding protein 1
873	9037	tr|F1RKK1|F1RKK1_PIG	F1RKK1	FBN2	37.55	1	3	3	Deamidation (NQ)	0	0	0	100	0	0	50	0	0	0	0	0	0	0	0	0	0	0	0	0	0	-:-:64.00:-:-:64.00:-:-:-:-:-:-:-:-:-:-:-:-:-:-:-	264629	Fibrillin 2 OS=Sus scrofa GN=FBN2 PE=1 SV=2	Fibrillin 2	FBN2	FBN2	Fibrillin 2
438	8771	tr|F1RKM0|F1RKM0_PIG	F1RKM0	LMNB1	200	15	8	5		16.213	0	0	0	0	0	0	0	0	0	0	0	0	67.8979	8.10652	71.3985	0	43.0056	0	100	78.2291	-:-:-:-:-:-:-:-:-:-:-:64.00:64.00:64.00:-:64.00:-:64.00:64.00:64.00:-	66486	Lamin B1 OS=Sus scrofa GN=LMNB1 PE=1 SV=2	Lamin B1	LMNB1	LMNB1	Lamin B1
159	8421	tr|F1RKY2|F1RKY2_PIG	F1RKY2	SERPIND1	200	31	12	12	Oxidation (M); Deamidation (NQ); Pyro-glu from Q; Phosphorylation (STY)	58.8709	58.1512	0	100	10.6439	26.2927	88.5083	0	0	92.1431	0	0	69.5641	59.5413	52.4884	47.2021	61.2348	21.2878	79.3095	74.7899	91.9597	64.00:0:64.00:1.00:12.55:64.00:0:0:64.00:0:0:64.00:64.00:64.00:64.00:4.80:64.00:64.00:64.00:64.00:64.00	55875	Serpin family D member 1 OS=Sus scrofa GN=SERPIND1 PE=1 SV=1	Serpin family D member 1	SERPIND1	SERPIND1	Serpin family D member 1
176	8931	tr|F1RLC4|F1RLC4_PIG	F1RLC4	LOX	35.55	18	5	5	Deamidation (NQ)	0	0	0	0	0	0	0	0	100	0	0	50	0	0	0	0	0	0	0	0	0	-:-:-:-:-:-:-:64.00:-:-:64.00:-:-:-:-:-:-:-:-:-:-	47009	Protein-lysine 6-oxidase OS=Sus scrofa GN=LOX PE=4 SV=1	Protein-lysine 6-oxidase	LOX	LOX	Protein-lysine 6-oxidase
626	9154	tr|F1RM24|F1RM24_PIG	F1RM24	PGLYRP1	200	26	3	3	Carbamidomethylation; Pyro-glu from Q	23.3707	0	0	0	0	0	63.7286	0	0	0	0	0	0	100	0	89.4903	0	46.7415	0	0	0	-:-:-:-:-:64.00:-:-:-:-:-:64.00:-:64.00:-:64.00:-:-:-:64.00:-	21223	Peptidoglycan-recognition protein OS=Sus scrofa GN=PGLYRP1 PE=1 SV=1	Peptidoglycan-recognition protein	PGLYRP1	PGLYRP1	Peptidoglycan-recognition protein
380	8641	tr|F1RM45|F1RM45_PIG	F1RM45	APOE	200	15	4	4		0	0	21.6355	88.0022	0	43.4827	72.134	0	0	77.5441	0	0	58.3468	43.271	0	0	0	0	70.9288	45.1155	100	-:64.00:64.00:-:64.00:64.00:-:-:64.00:-:-:64.00:-:-:-:-:64.00:64.00:64.00:-:64.00	36665	Apolipoprotein E OS=Sus scrofa GN=APOE PE=1 SV=1	Apolipoprotein E	APOE	APOE	Apolipoprotein E
945	9190	tr|F1RMB2|F1RMB2_PIG	F1RMB2	BMP1	153.53	2	2	2		28.4041	0	0	56.8083	0	0	0	0	0	95.5936	0	0	0	100	0	0	0	0	57.1234	0	0	-:-:64.00:-:-:-:-:-:64.00:-:-:64.00:-:-:-:-:64.00:-:-:64.00:-	114102	Metalloendopeptidase OS=Sus scrofa GN=BMP1 PE=3 SV=2	Metalloendopeptidase	BMP1	BMP1	Metalloendopeptidase
1266	9597	tr|F1RMM0|F1RMM0_PIG	F1RMM0	CAVIN3	47.43	10	2	2		0.162788	100	93.1484	0	0.0813938	0	0	16.5444	0	48.8843	0	0	12.9384	43.5174	2.21083	71.5312	53.9187	78.968	0	94.7535	0	64.00:64.00:0:1.00:0:0:2.65:0:20.27:0:0:13.00:1.12:64.00:25.99:64.00:0:64.00:0:1.26:2.16	27352	Caveolae associated protein 3 OS=Sus scrofa GN=CAVIN3 PE=1 SV=2	Caveolae associated protein 3	CAVIN3	CAVIN3	Caveolae associated protein 3
270	8494	tr|F1RMZ8|F1RMZ8_PIG	F1RMZ8	ATP6V1B2	200	20	9	9	Deamidation (NQ); Pyro-glu from Q	0	100	66.6713	0	0	32.5006	0	0	33.6892	0	0	3.13255	32.7633	6.26511	0	48.0719	0	57.0163	0	0	21.4324	64.00:64.00:-:-:64.00:-:-:64.00:-:-:64.00:64.00:-:64.00:-:64.00:-:-:64.00:-:64.00	56613	ATPase H+ transporting V1 subunit B2 OS=Sus scrofa GN=LOC106504095 PE=1 SV=1	ATPase H+ transporting V1 subunit B2	LOC106504095	ATP6V1B2	ATPase H+ transporting V1 subunit B2
389	8697	tr|F1RN41|F1RN41_PIG	F1RN41	F10	200	13	6	5		0	52.3393	37.3115	85.035	0	0	78.5245	0	0	91.5871	0	0	60.1302	65.3787	0	42.4088	35.4656	17.7328	85.8982	88.9531	100	64.00:64.00:64.00:-:-:64.00:-:-:64.00:-:-:64.00:-:64.00:64.00:64.00:64.00:64.00:64.00:-:64.00	53187	Coagulation factor X OS=Sus scrofa GN=F10 PE=1 SV=1	Coagulation factor X	F10	F10	Coagulation factor X
515	8775	tr|F1RN59|F1RN59_PIG	F1RN59	PAM	92.89	9	4	4	Deamidation (NQ)	0	0	0	100	0	0	77.8385	0	0	75.8455	0	0	0	68.4847	0	34.2424	0	0	88.6946	74.6894	69.109	-:-:64.00:-:-:64.00:-:-:64.00:-:-:64.00:-:64.00:-:-:64.00:64.00:64.00:-:-	109589	Peptidylglycine alpha-amidating monooxygenase OS=Sus scrofa GN=PAM PE=4 SV=2	Peptidylglycine alpha-amidating monooxygenase	PAM	PAM	Peptidylglycine alpha-amidating monooxygenase
630	8952	tr|F1RNZ1|F1RNZ1_PIG	F1RNZ1	UQCRFS1	200	25	5	5		14.9263	100	55.8474	82.5738	0	0	89.6371	0	0	96.2252	0	0	0	76.8516	0	29.8527	0	60.9004	73.4015	0	0	64.00:64.00:64.00:-:-:64.00:-:-:64.00:-:-:64.00:-:64.00:-:64.00:64.00:-:-:64.00:-	29454	Cytochrome b-c1 complex subunit Rieske mitochondrial OS=Sus scrofa GN=UQCRFS1 PE=1 SV=1	Cytochrome b-c1 complex subunit Rieske mitochondrial	UQCRFS1	UQCRFS1	Cytochrome b-c1 complex subunit Rieske mitochondrial
1141	10601	tr|F1RPA3|F1RPA3_PIG	F1RPA3	GPRC5B	200	4	2	2	Oxidation (M)	71.3708	84.9511	84.0383	91.2114	13.3182	0	83.4747	0	0	84.7045	53.9818	0	100	73.9208	91.8236	0	26.6364	0	66.8752	0	0	19.18:13.37:24.56:1.00:0:17.48:0:0:21.65:3.75:0:12.13:29.45:0:1.64:0:15.41:0:0:15.49:41.55	43959	G protein-coupled receptor class C group 5 member B OS=Sus scrofa GN=GPRC5B PE=4 SV=2	G protein-coupled receptor class C group 5 member B	GPRC5B	GPRC5B	G protein-coupled receptor class C group 5 member B
479	8594	tr|F1RPD2|F1RPD2_PIG	F1RPD2	UQCRC2	200	27	7	4		0	67.6595	0	0	0	0	0	0	0	54.3452	0	0	13.7997	100	0	27.5994	38.4974	53.2957	31.5646	0	0	64.00:-:-:-:-:-:-:-:64.00:-:-:64.00:-:64.00:64.00:64.00:64.00:-:-:-:64.00	48820	cytochrome b-c1 complex subunit 2, mitochondrial OS=Sus scrofa GN=LOC100524613 PE=1 SV=2	cytochrome b-c1 complex subunit 2, mitochondrial	LOC100524613	UQCRC2	cytochrome b-c1 complex subunit 2, mitochondrial
878	9245	tr|F1RPE4|F1RPE4_PIG	F1RPE4	TCN2	24.87	6	2	2	Deamidation (NQ)	0	23.0979	0	0	0	0	0	0	0	0	0	0	0	0	0	60.5974	0	11.0154	88.9019	100	22.0309	64.00:-:-:-:-:-:-:-:-:-:-:-:-:64.00:-:64.00:64.00:64.00:64.00:-:-	47700	transcobalamin 2 OS=Sus scrofa GN=TCN2 PE=4 SV=1	transcobalamin 2	TCN2	TCN2	transcobalamin 2
97	8361	tr|F1RPS8|F1RPS8_PIG	F1RPS8	ATP5A1	200	45	23	22	Deamidation (NQ)	0	100	54.0232	0	0	26.7673	0	0	81.4123	0	0	0	64.4354	0	0	74.119	0	79.5442	53.5345	90.0106	64.9441	64.00:64.00:-:-:64.00:-:-:64.00:-:-:-:-:-:64.00:-:64.00:64.00:64.00:64.00:-:64.00	57627	ATP synthase subunit alpha OS=Sus scrofa GN=ATP5A1 PE=3 SV=1	ATP synthase subunit alpha	ATP5A1	ATP5A1	ATP synthase subunit alpha
456	8707	tr|F1RPW9|F1RPW9_PIG	F1RPW9	EEF1G	200	16	7	7	Phosphorylation (STY)	48.9207	69.8465	79.6383	0	47.325	18.9216	7.13059	14.2612	49.8861	0	20.9403	41.53	15.2579	50.3553	58.5301	46.5712	91.492	23.3014	32.7981	100	63.9217	2.05:2.17:0:1.00:0.65:0.18:0.27:0.28:0:0.23:0.23:0.99:1.51:1.03:5.05:0.53:0.86:3.69:0.89:1.33:0.28	50312	Elongation factor 1-gamma OS=Sus scrofa GN=EEF1G PE=4 SV=1	Elongation factor 1-gamma	EEF1G	EEF1G	Elongation factor 1-gamma
1208	9373	tr|F1RQ90|F1RQ90_PIG	F1RQ90	RBMX	200	6	2	2		2.99466	50.9137	72.1382	86.6648	78.1712	0.626297	77.9573	43.61	100	82.0337	77.0988	63.0024	61.7761	50.7697	1.25259	32.038	30.3698	62.0037	59.5015	7.50234	81.2596	0.18:0.44:1.38:1.00:0.02:0.83:0.13:0.89:1.23:0.60:0.12:0.18:0.02:0.07:0.06:0.52:0.51:0.02:0.56:0.02:0.37	42275	RNA binding motif protein, X-linked OS=Sus scrofa GN=RBMX PE=1 SV=1	RNA binding motif protein, X-linked	RBMX	RBMX	RNA binding motif protein, X-linked
671	8806	tr|F1RQ91|F1RQ91_PIG	F1RQ91	RPS4X	200	17	4	4		0	64.3867	0	73.6504	26.2843	51.6487	58.592	91.8294	100	38.4361	86.1918	97.6083	63.7441	13.1422	0	40.2074	0	68.231	49.2993	90.2503	78.9937	10.33:0:18.48:1.00:10.12:6.88:64.00:30.65:2.17:32.00:30.30:0.37:0:2.64:0:20.76:6.81:31.47:14.55:0:11.20	29598	40S ribosomal protein S4 OS=Sus scrofa GN=RPS4X PE=1 SV=2	40S ribosomal protein S4	RPS4X	RPS4X	40S ribosomal protein S4
145	8466	tr|F1RQI0|F1RQI0_PIG	F1RQI0	COL12A1	200	19	11	10	Deamidation (NQ)	12.8727	5.42376	32.6733	63.5713	46.1655	30.8544	78.83	0	0	0	0	0	0	50.7464	10.8475	57.347	33.2972	51.3772	83.5871	100	96.6601	0.03:0.20:3.63:1.00:0.53:13.03:0:0:0:0:0:1.29:0.05:2.72:0.31:2.09:35.20:44.90:32.63:0.08:0	102043	Uncharacterized protein OS=Sus scrofa PE=1 SV=2	Collagen type XII alpha 1 chain	COL12A1	COL12A1	Collagen type XII alpha 1 chain
613	8986	tr|F1RQI2|F1RQI2_PIG	F1RQI2	COL12A1	200	50	5	4		31.7141	45.5399	44.6665	0	48.0043	64.4505	0	13.7314	75.8826	0	0	0	0	46.3132	40.6471	27.4627	0	44.8475	88.8266	100	90.1152	0.72:0.50:0:1.00:5.94:0:0.09:1.68:0:0:0:0.78:0.59:0.26:0:1.08:24.73:17.07:8.34:0.41:0	11089	Uncharacterized protein OS=Sus scrofa PE=1 SV=2	obsolete	COL12A1	COL12A1	Collagen type XII alpha 1 chain	Uniprot listed as obsolete, NIH Smart Blast associates with collagen alpha-1(XII) chain
328	8585	tr|F1RQU2|F1RQU2_PIG	F1RQU2	HSP90AB1	25.61	14	9	2	Deamidation (NQ)	54.6851	82.3972	45.8867	71.4323	0	77.203	0	0	0	0	0	0	0	47.9113	22.9433	68.172	51.0758	69.5245	83.6141	100	97.9005	64.00:64.00:64.00:-:64.00:-:-:-:-:-:-:64.00:64.00:64.00:64.00:64.00:64.00:64.00:64.00:64.00:-	83253	Heat shock protein 90 alpha family class B member 1 OS=Sus scrofa GN=HSP90AB1 PE=1 SV=1	Heat shock protein 90 alpha family class B member 1	HSP90AB1	HSP90AB1	Heat shock protein 90 alpha family class B member 1
156	8441	tr|F1RQW6|F1RQW6_PIG	F1RQW6	CFB	200	19	12	12	Deamidation (NQ)	0	39.5675	0	100	0	42.83	95.0046	0	0	96.596	57.5114	0	77.1948	64.8184	0	0	19.7837	0	81.5987	89.9409	80.1399	64.00:-:64.00:-:64.00:64.00:-:-:64.00:64.00:-:64.00:-:-:64.00:-:64.00:64.00:64.00:-:64.00	85879	Complement factor B OS=Sus scrofa GN=CFB PE=1 SV=1	Complement factor B	CFB	CFB	Complement factor B
1108	9544	tr|F1RR69|F1RR69_PIG	F1RR69	SET	48.22	15	2	2		0	75.0892	0	0	0	0	0	0	0	0	0	0	0	28.9383	0	63.9027	0	61.1235	57.8766	100	74.6925	64.00:-:-:-:-:-:-:-:-:-:-:64.00:-:64.00:-:64.00:64.00:64.00:64.00:-:-	33615	Protein SET OS=Sus scrofa PE=1 SV=1	Protein SET	SET	SET	Protein SET
511	9239	tr|F1RR78|F1RR78_PIG	F1RR78	SPTAN1	23.68	1	2	2		0	100	0	0	0	0	0	0	0	73.7611	0	0	0	91.9994	0	22.7871	0	45.5742	62.123	98.1884	91.5861	64.00:-:-:-:-:-:-:-:64.00:-:-:64.00:-:64.00:-:64.00:64.00:64.00:64.00:-:-	282105	Spectrin alpha non-erythrocytic 1 OS=Sus scrofa GN=SPTAN1 PE=1 SV=2	Spectrin alpha non-erythrocytic 1	SPTAN1	SPTAN1	Spectrin alpha non-erythrocytic 1
317	8500	tr|F1RR92|F1RR92_PIG	F1RR92	SLIT3	200	11	10	10	Deamidation (NQ)	0	83.844	60.5034	96.8163	0	18.7344	81.1578	26.8991	67.824	100	45.2741	63.8196	60.1888	42.8945	0	9.3672	0	41.9482	63.1829	76.4058	69.8007	64.00:64.00:64.00:-:64.00:64.00:64.00:64.00:64.00:64.00:64.00:64.00:-:64.00:-:64.00:64.00:64.00:64.00:-:64.00	147157	Slit guidance ligand 3 OS=Sus scrofa GN=SLIT3 PE=4 SV=2	Slit guidance ligand 3	SLIT3	SLIT3	Slit guidance ligand 3
264	8557	tr|F1RRX1|F1RRX1_PIG	F1RRX1	LCN2	200	57	17	17	Oxidation (M); Deamidation (NQ); Pyro-glu from Q	0	0	33.736	0	0	0	0	0	0	0	0	0	0	100	67.472	90.8021	0	0	0	0	0	-:64.00:-:-:-:-:-:-:-:-:-:64.00:64.00:64.00:-:-:-:-:-:-:-	22446	Lipocalin 2 OS=Sus scrofa GN=LCN2 PE=1 SV=1	Lipocalin 2	LCN2	LCN2	Lipocalin 2
186	8386	tr|F1RS36|F1RS36_PIG	F1RS36	HSPA5	200	33	17	15	Deamidation (NQ)	23.8605	74.7557	43.5669	86.2466	11.9302	0	58.6465	30.7498	71.0107	71.114	0	76.7215	47.2475	35.0445	0	32.0015	51.9622	55.213	85.9027	100	95.9572	48.94:4.80:64.00:1.00:0:16.88:3.21:11.19:44.23:0:18.72:3.89:0:3.88:12.11:21.79:64.00:64.00:64.00:2.70:9.44	70252	78 kDa glucose-regulated protein OS=Sus scrofa GN=HSPA5 PE=1 SV=2	78 kDa glucose-regulated protein	HSPA5	HSPA5	78 kDa glucose-regulated protein
43	8332	tr|F1RS37|F1RS37_PIG	F1RS37	POSTN	200	61	52	5	Carbamidomethylation; Oxidation (M); Deamidation (NQ); Phosphorylation (STY)	0	0	0	4.93908	0	0	3.03157	0	0	1.51579	0	0	3.08981	0	0	0	0	45.5177	73.2086	100	78.262	-:-:64.00:-:-:64.00:-:-:64.00:-:-:-:-:-:-:64.00:64.00:64.00:64.00:-:64.00	93179	Periostin OS=Sus scrofa GN=POSTN PE=1 SV=1	Periostin	POSTN	POSTN	Periostin
1249	9617	tr|F1RT90|F1RT90_PIG	F1RT90	ASPH	25.84	6	2	2		16.0398	39.3513	32.0797	59.4663	82.1709	72.8319	91.3188	84.1254	0	0	100	0	43.6874	0	71.643	63.4085	48.26	0	0	61.1214	0	0.06:0.03:0.20:1.00:1.06:1.49:1.07:0:0:2.00:0:0:0.50:0.32:0.11:0:0:0.13:0:0.02:0.08	62857	Aspartate beta-hydroxylase OS=Sus scrofa GN=ASPH PE=1 SV=2	Aspartate beta-hydroxylase	ASPH	ASPH	Aspartate beta-hydroxylase
144	8383	tr|F1RT93|F1RT93_PIG	F1RT93	CHAD	200	60	20	19	Deamidation (NQ)	2.22681	0	0	0	0	0	0	4.45363	0	45.9471	0	14.3932	0	40.728	0	10.5387	0	0	49.8767	32.0755	100	-:-:-:-:-:-:64.00:-:64.00:-:64.00:64.00:-:64.00:-:-:64.00:64.00:64.00:64.00:-	40618	Chondroadherin OS=Sus scrofa GN=CHAD PE=4 SV=2	Chondroadherin	CHAD	CHAD	Chondroadherin
891	9313	tr|F1RU22|F1RU22_PIG	F1RU22	EFEMP2	200	8	2	2	Deamidation (NQ)	65.5325	100	0	0	74.6341	68.9681	62.4182	0	0	63.6057	0	0	31.2091	84.8201	95.3275	80.5904	0	0	0	0	0	3.50:0:0:1.00:1.42:0.43:0:0:0.54:0:0:1.54:3.08:1.48:0:0:0:0:0:0.76:0.09	49400	EGF containing fibulin like extracellular matrix protein 2 OS=Sus scrofa GN=EFEMP2 PE=1 SV=1	EGF containing fibulin like extracellular matrix protein 2	EFEMP2	EFEMP2	EGF containing fibulin like extracellular matrix protein 2
341	8662	tr|F1RUK8|F1RUK8_PIG	F1RUK8	GDI2	200	24	9	3		73.5589	41.2825	94.3578	66.8824	20.6412	0	0	0	0	0	0	0	76.0654	41.8016	0	0	61.7962	0	78.74	100	68.7046	2.41:24.91:8.50:1.00:0:0:0:0:0:0:0:2.53:0:0:7.18:0:27.63:25.68:5.16:17.63:15.49	50327	Rab GDP dissociation inhibitor OS=Sus scrofa GN=GDI2 PE=1 SV=1	Rab GDP dissociation inhibitor	GDI2	GDI2	Rab GDP dissociation inhibitor
1	8338	tr|F1RUN2|F1RUN2_PIG	F1RUN2	ALB	200	63	86	4	Carbamidomethylation; Deamidation (NQ); Pyro-glu from Q; Phosphorylation (STY)	48.8212	55.9765	48.8212	100	38.9617	31.4367	75.8171	11.1269	36.9872	80.6269	47.1843	94.9636	77.9503	49.1515	22.2537	43.2443	26.1586	45.8536	80.031	59.8536	65.2017	3.49:1.41:64.00:1.00:1.04:17.37:0.10:0.21:30.30:1.27:29.18:2.04:0.25:1.52:0.32:2.38:44.59:2.72:4.06:2.82:24.08	69670	Serum albumin OS=Sus scrofa GN=ALB PE=1 SV=1	Serum albumin	ALB	ALB	Serum albumin
1245	9499	tr|F1RUQ0|F1RUQ0_PIG	F1RUQ0	JCHAIN	26.55	16	2	2	Pyro-glu from Q	54.3669	31.2094	0	0	0	0	0	0	0	0	0	0	0	53.4783	0	29.2786	10.6204	5.31022	0	100	0	64.00:-:-:-:-:-:-:-:-:-:-:64.00:-:64.00:64.00:64.00:-:64.00:-:64.00:-	18001	Joining chain of multimeric IgA and IgM OS=Sus scrofa GN=JCHAIN PE=1 SV=1	Joining chain of multimeric IgA and IgM	JCHAIN	JCHAIN	Joining chain of multimeric IgA and IgM
798	9390	tr|F1RUQ3|F1RUQ3_PIG	F1RUQ3	AMTN	26.57	10	2	2	Deamidation (NQ); Pyro-glu from Q	0	7.64176	100	0	0	57.9907	0	0	0	39.2391	0	0	15.2835	0	0	24.7208	0	84.4703	0	0	0	64.00:64.00:-:-:64.00:-:-:-:64.00:-:-:-:-:64.00:-:64.00:-:-:-:-:64.00	22072	Amelotin OS=Sus scrofa GN=AMTN PE=4 SV=2	Amelotin	AMTN	AMTN	Amelotin
72	8482	tr|F1RW34|F1RW34_PIG	F1RW34	DSPP	200	26	17	15	Oxidation (M); Deamidation (NQ); Phosphorylation (STY)	47.3377	22.8339	26.8814	100	0	43.303	92.3323	11.417	0	99.6196	46.795	43.0894	84.9337	54.433	51.4686	61.7791	86.785	46.2342	99.025	92.2659	67.5721	64.00:64.00:64.00:-:64.00:64.00:64.00:-:64.00:64.00:64.00:64.00:64.00:64.00:64.00:64.00:64.00:64.00:64.00:64.00:64.00	60563	dentin sialophosphoprotein preproprotein OS=Sus scrofa GN=DSPP PE=4 SV=1	dentin sialophosphoprotein preproprotein	DSPP	DSPP	dentin sialophosphoprotein preproprotein
67	8343	tr|F1RW75|F1RW75_PIG	F1RW75	DSP	200	29	69	67	Oxidation (M); Deamidation (NQ); Pyro-glu from Q; Phosphorylation (STY)	54.1546	70.9116	38.1697	65.717	13.5786	33.0714	62.8204	0	60.0914	72.3678	0	0	27.1571	60.5924	51.4713	67.9782	61.348	79.7858	68.1491	76.8905	100	64.00:4.96:64.00:1.00:9.99:52.89:0:12.57:64.00:0:0:46.03:23.79:64.00:51.38:64.00:64.00:64.00:64.00:38.12:3.04	308373	Desmoplakin OS=Sus scrofa GN=DSP PE=1 SV=2	Desmoplakin	DSP	DSP	Desmoplakin
1013	9566	tr|F1RW78|F1RW78_PIG	F1RW78	SSR1	200	8	2	2		0	66.4269	49.7982	96.2035	9.3114	42.1988	85.3925	0	0	100	0	0	79.3921	0	0	0	48.956	18.6228	86.0119	98.5988	0	4.71:2.09:11.18:1.00:5.15:8.06:0:0:14.67:0:0:0:0:0:2.99:1.78:14.89:6.94:0:0:7.83	31907	signal sequence receptor subunit 1 OS=Sus scrofa GN=SSR1 PE=1 SV=2	signal sequence receptor subunit 1	SSR1	SSR1	signal sequence receptor subunit 1
904	9284	tr|F1RX31|F1RX31_PIG	F1RX31	SFRP2	200	4	2	2		0	0	0	24.0542	0	0	12.0271	0	0	54.6231	0	0	0	0	0	0	0	0	48.6081	0	100	-:-:64.00:-:-:64.00:-:-:64.00:-:-:-:-:-:-:-:64.00:-:64.00:-:-	33312	Secreted frizzled-related protein 2 OS=Sus scrofa GN=SFRP2 PE=1 SV=1	Secreted frizzled-related protein 2	SFRP2	SFRP2	Secreted frizzled-related protein 2
452	8625	tr|F1RX35|F1RX35_PIG	F1RX35	FGGL	200	20	7	5		10.9216	38.5318	0	5.46079	0	0	0	0	0	0	0	0	53.3962	28.0742	25.1663	38.7586	21.5784	47.6897	60.8679	100	95.2714	64.00:-:64.00:-:-:-:-:-:-:-:-:64.00:64.00:64.00:64.00:64.00:64.00:64.00:64.00:64.00:64.00	49619	fibrinogen gamma chain-like OS=Sus scrofa GN=LOC100627396 PE=1 SV=2	fibrinogen gamma chain-like	LOC100627396	FGGL	fibrinogen gamma chain-like
477	8706	tr|F1RX36|F1RX36_PIG	F1RX36	FGA	200	28	7	3		0	88.9006	0	0	0	0	0	0	84.3507	0	79.8432	90.6653	38.635	77.2701	0	82.2293	0	93.765	0	93.0509	100	64.00:-:-:-:-:-:-:64.00:-:64.00:64.00:64.00:-:64.00:-:64.00:-:64.00:64.00:-:64.00	32148	fibrinogen alpha chain OS=Sus scrofa GN=LOC102158263 PE=1 SV=2	fibrinogen alpha chain	LOC102158263	FGA	fibrinogen alpha chain
490	8766	tr|F1RX81|F1RX81_PIG	F1RX81	CTNNB1U	200	7	4	4	Deamidation (NQ)	0	100	0	0	0	0	0	0	0	0	0	0	33.3172	88.8063	0	16.6586	0	53.9266	0	38.6549	0	64.00:-:-:-:-:-:-:-:-:-:-:64.00:-:64.00:-:64.00:-:64.00:-:-:64.00	85197	catenin beta-1-like uncertain OS=Sus scrofa GN=LOC100627228 PE=4 SV=1	catenin beta-1-like uncertain	LOC100627228	CTNNB1U	catenin beta-1-like uncertain
656	9111	tr|F1RXC2|F1RXC2_PIG	F1RXC2	CA2	200	12	3	3		11.5438	58.7087	67.4462	63.1422	0	50.1509	68.0007	49.5869	0	55.8567	56.2755	100	35.6942	2.10084	0	0	24.9701	4.20167	21.3675	15.5913	0	64.00:64.00:64.00:-:64.00:64.00:64.00:-:64.00:64.00:64.00:64.00:-:-:64.00:64.00:64.00:64.00:-:64.00:64.00	29460	Carbonic anhydrase 2 OS=Sus scrofa GN=CA2 PE=1 SV=1	Carbonic anhydrase 2	CA2	CA2	Carbonic anhydrase 2
236	8584	tr|F1RYI8|F1RYI8_PIG	F1RYI8	COL3A1	200	8	10	10	Carbamidomethylation; Deamidation (NQ); Pyro-glu from Q	0	0	0	57.8949	0	0	56.417	10.3702	52.484	47.7566	50.5214	63.835	44.186	0	56.9518	0	20.7403	73.8538	74.5326	100	84.3505	-:-:64.00:-:-:64.00:64.00:64.00:64.00:64.00:64.00:-:64.00:-:64.00:64.00:64.00:64.00:64.00:-:64.00	138619	Collagen type III alpha 1 OS=Sus scrofa GN=COL3A1 PE=1 SV=2	Collagen type III alpha 1	COL3A1	COL3A1	Collagen type III alpha 1
473	9129	tr|F1RYZ0|F1RYZ0_PIG	F1RYZ0	RPLP2	200	59	4	4		16.1295	77.6382	0	0	0	0	0	0	0	19.5998	0	0	26.9593	4.30165	22.0623	41.0189	2.15082	63.8723	53.9877	100	66.5532	64.00:-:-:-:-:-:-:-:64.00:-:-:64.00:64.00:64.00:64.00:64.00:64.00:64.00:64.00:64.00:64.00	11693	60S acidic ribosomal protein P2 OS=Sus scrofa GN=RPLP2 PE=1 SV=1	60S acidic ribosomal protein P2	RPLP2	RPLP2	60S acidic ribosomal protein P2
852	9153	tr|F1RZ01|F1RZ01_PIG	F1RZ01	CHID1	200	9	3	3		0	0	0	100	0	0	81.1623	0	0	99.2855	0	0	17.8782	0	35.7564	0	47.8148	0	98.5672	64.2349	0	-:-:64.00:-:-:64.00:-:-:64.00:-:-:-:64.00:-:64.00:-:64.00:64.00:-:-:64.00	44553	Chitinase domain containing 1 OS=Sus scrofa GN=CHID1 PE=1 SV=1	Chitinase domain containing 1	CHID1	CHID1	Chitinase domain containing 1
853	9230	tr|F1RZ28|F1RZ28_PIG	F1RZ28	RPS10	200	24	3	3	Deamidation (NQ)	0	35.36	50.197	0	0	0	0	0	0	0	0	0	17.68	49.7643	0	69.856	0	87.6197	82.1521	100	87.9834	64.00:64.00:-:-:-:-:-:-:-:-:-:64.00:-:64.00:-:64.00:64.00:64.00:64.00:-:64.00	18932	ribosomal protein S10 OS=Sus scrofa GN=RPS10 PE=1 SV=1	ribosomal protein S10	RPS10	RPS10	ribosomal protein S10
730	8898	tr|F1RZD0|F1RZD0_PIG	F1RZD0	FKBP7	200	15	3	3		0	72.0308	0	74.9503	0	0	66.0757	0	0	100	0	0	9.2981	0	0	0	0	18.5962	88.6116	0	56.8664	64.00:-:64.00:-:-:64.00:-:-:64.00:-:-:-:-:-:-:64.00:64.00:-:64.00:-:64.00	25629	FK506 binding protein 7 OS=Sus scrofa GN=FKBP7 PE=4 SV=1	FK506 binding protein 7	FKBP7	FKBP7	FK506 binding protein 7
1240	10355	tr|F1RZH4|F1RZH4_PIG	F1RZH4	RPS15A	200	16	2	2		0	81.2904	0	92.2702	0	14.5559	83.7819	0	0	90.4597	0	0	85.6852	0	0	29.1119	87.2498	79.8773	82.8851	100	86.1291	64.00:-:64.00:-:64.00:64.00:-:-:64.00:-:-:-:-:64.00:64.00:64.00:64.00:64.00:64.00:-:64.00	14288	40S ribosomal protein S15a-like OS=Sus scrofa PE=1 SV=1	40S ribosomal protein S15a-like	LOC100514137	RPS15A	40S ribosomal protein S15a-like
787	9198	tr|F1RZJ8|F1RZJ8_PIG	F1RZJ8	FGFR1	200	4	3	3	HexNAcylation (N)	82.262	0	0	82.7799	0	33.0376	88.1628	0	0	100	0	0	70.9831	80.2951	0	0	66.0752	0	90.2893	83.0312	67.4238	-:-:64.00:-:64.00:64.00:-:-:64.00:-:-:64.00:-:-:64.00:-:64.00:64.00:64.00:64.00:64.00	91664	Fibroblast growth factor receptor OS=Sus scrofa GN=FGFR1 PE=3 SV=3	Fibroblast growth factor receptor	FGFR1	FGFR1	Fibroblast growth factor receptor
506	9378	tr|F1S081|F1S081_PIG	F1S081	ITGA6	20.04	4	2	2		0	0	0	0	0	0	0	0	0	0	0	0	0	0	0	0	0	100	0	0	0	-:-:-:-:-:-:-:-:-:-:-:-:-:-:-:64.00:-:-:-:-:-	124568	Integrin subunit alpha 6 OS=Sus scrofa GN=ITGA6 PE=1 SV=2	Integrin subunit alpha 6	ITGA6	ITGA6	Integrin subunit alpha 6
50	8336	tr|F1S0J8|F1S0J8_PIG	F1S0J8	KRT19	200	86	31	21	Oxidation (M); Deamidation (NQ); Pyro-glu from Q	0	100	56.246	0	0	0	0	0	82.805	8.34364	0	0	54.3835	45.1844	0	89.1331	16.6873	94.5799	0	78.8235	0	64.00:64.00:-:-:-:-:-:64.00:64.00:-:-:64.00:-:64.00:64.00:64.00:-:64.00:-:-:64.00	44213	Keratin 19 OS=Sus scrofa GN=KRT19 PE=1 SV=1	Keratin 19	KRT19	KRT19	Keratin 19
70	8653	tr|F1S0J9|F1S0J9_PIG	F1S0J9	KRT1-T14	200	77	23	7	Carbamidomethylation; Deamidation (NQ); Phosphorylation (STY)	0	100	7.71127	0	0	0	0	0	51.3315	0	0	0	44.5601	0	0	46.883	0	65.5391	0	15.4225	0	64.00:64.00:-:-:-:-:-:64.00:-:-:-:-:-:64.00:-:64.00:-:64.00:-:-:64.00	10692	Uncharacterized protein OS=Sus scrofa PE=3 SV=1	obsolete	KRT1-T14	KRT1-T14	Keratin, uncertain	Uniprot listed as obsolete, NIH Smart Blast associates with keratin type I cytoskeletal 14
57	8458	tr|F1S0K1|F1S0K1_PIG	F1S0K1	KRT13	200	27	17	5	Deamidation (NQ); Pyro-glu from Q	0	33.6867	0	0	0	20.5218	0	38.8228	98.1377	0	46.0073	100	10.2609	42.3204	0	58.2906	0	0	0	0	0	64.00:-:-:-:64.00:-:64.00:64.00:-:64.00:64.00:64.00:-:64.00:-:-:-:-:-:-:64.00	49194	Keratin 13 OS=Sus scrofa GN=KRT13 PE=1 SV=1	Keratin 13	KRT13	KRT13	Keratin 13
65	8508	tr|F1S0K2|F1S0K2_PIG	F1S0K2	KRT15	109.69	25	15	3	Oxidation (M); Deamidation (NQ)	16.9942	82.1342	0	0	0	0	0	0	0	0	0	0	0	66.9083	0	62.01	48.8406	33.9884	64.0913	100	0	64.00:-:-:-:-:-:-:-:-:-:-:64.00:-:64.00:64.00:64.00:64.00:64.00:-:64.00:-	49417	Keratin 15 OS=Sus scrofa GN=KRT15 PE=1 SV=1	Keratin 15	KRT15	KRT15	Keratin 15
298	9008	tr|F1S0K8|F1S0K8_PIG	F1S0K8	KRT36	29.73	9	4	2		0	5.85991	0	100	21.8743	0	92.5984	0	0	93.6022	0.967388	0	85.095	0	52.2778	57.8865	36.442	1.93478	93.2629	0	98.1491	0.39:0:40.62:1.00:0:27.94:0:0:34.46:0.23:0:0:4.43:6.35:1.89:0.50:52.31:0:20.56:0:22.37	38139	Keratin 36 OS=Sus scrofa GN=KRT36 PE=1 SV=2	Keratin 36	KRT36	KRT36	Keratin 36
9	8328	tr|F1S0L1|F1S0L1_PIG	F1S0L1	KRT14	200	78	87	58	Carbamidomethylation; Oxidation (M); Deamidation (NQ); Phosphorylation (STY)	23.8914	100	52.8195	20.6766	18.2227	0	0	0	84.1281	9.11136	0	0	43.1164	35.1289	30.4414	93.2947	35.524	96.1918	25.325	88.9283	0	64.00:10.89:1.03:1.00:0:0:0:57.64:0.46:0:0:3.54:2.69:64.00:3.83:64.00:2.71:64.00:0:1.99:7.55	51501	Keratin 14 OS=Sus scrofa GN=KRT14 PE=1 SV=2	Keratin 14	KRT14	KRT14	Keratin 14
793	9112	tr|F1S0M9|F1S0M9_PIG	F1S0M9	FKBP10	200	17	3	3		0	0	0	61.5331	0	0	0	0	0	73.7285	0	0	0	0	0	0	0	0	57.9507	100	28.9753	-:-:64.00:-:-:-:-:-:64.00:-:-:-:-:-:-:-:64.00:64.00:64.00:-:-	34189	Peptidylprolyl isomerase OS=Sus scrofa PE=1 SV=2	Peptidylprolyl isomerase	FKBP10	FKBP10	Peptidylprolyl isomerase
653	8633	tr|F1S0R4|F1S0R4_PIG	F1S0R4	ATP6V1C1	200	26	8	8		0	83.0968	57.2185	0	0	71.9624	73.5937	81.1999	100	0	84.4638	98.2461	19.2149	55.2323	38.4298	59.9767	0	63.2678	0	74.6739	68.1351	64.00:64.00:-:-:64.00:64.00:64.00:64.00:-:64.00:64.00:64.00:64.00:64.00:-:64.00:-:64.00:64.00:-:64.00	44033	V-type proton ATPase subunit C OS=Sus scrofa GN=ATP6V1C1 PE=1 SV=2	V-type proton ATPase subunit C	ATP6V1C1	ATP6V1C1	V-type proton ATPase subunit C
560	9797	tr|F1S1A9|F1S1A9_PIG	F1S1A9	APOA2	200	17	2	2	Deamidation (NQ)	0	0	0	47.0316	0	0	12.6429	0	60.7544	19.1251	26.4956	37.3063	6.32143	0	0	0	0	0	47.3409	92.5948	100	-:-:64.00:-:-:64.00:-:64.00:64.00:64.00:64.00:-:-:-:-:-:64.00:64.00:64.00:-:64.00	11113	Apolipoprotein A-II OS=Sus scrofa GN=APOA2 PE=1 SV=1	Apolipoprotein A-II	APOA2	APOA2	Apolipoprotein A-II
625	8784	tr|F1S1D6|F1S1D6_PIG	F1S1D6	ATP6V0A1	200	7	5	5		65.5312	100	32.7656	0	0	0	0	0	0	0	0	0	0	94.7812	0	89.7145	0	92.7085	0	0	0	64.00:64.00:-:-:-:-:-:-:-:-:-:64.00:-:64.00:-:64.00:-:-:-:64.00:-	95595	V-type proton ATPase subunit a OS=Sus scrofa GN=ATP6V0A1 PE=1 SV=2	V-type proton ATPase subunit a	ATP6V0A1	ATP6V0A1	V-type proton ATPase subunit a
237	8436	tr|F1S1G7|F1S1G7_PIG	F1S1G7	AOC2	200	20	12	9		35.5403	0	0	89.5362	0	0	69.5235	0	15.2819	95.6633	0	0	0	7.64094	76.3532	38.3055	84.1751	60.0526	100	83.776	0	-:-:64.00:-:-:64.00:-:64.00:64.00:-:-:64.00:64.00:64.00:64.00:64.00:64.00:64.00:-:64.00:-	83630	Amine oxidase OS=Sus scrofa GN=AOC2 PE=3 SV=1	Amine oxidase	AOC2	AOC2	Amine oxidase
17	8367	tr|F1S2B6|F1S2B6_PIG	F1S2B6	BGN	200	66	44	17	Carbamidomethylation; Oxidation (M); Deamidation (NQ); Phosphorylation (STY)	0	0	0	64.6219	0	0	32.311	0	0	87.9952	0	0	0	0	0	0	0	0	100	97.9483	88.0282	-:-:64.00:-:-:64.00:-:-:64.00:-:-:-:-:-:-:-:64.00:64.00:64.00:-:-	41775	Biglycan OS=Sus scrofa GN=BGN PE=1 SV=1	Biglycan	BGN	BGN	Biglycan
1140	9881	tr|F1S2Q3|F1S2Q3_PIG	F1S2Q3	TMED10	200	9	2	2		0	45.6403	0	0	0	0	0	0	0	0	0	0	0	0	0	17.866	0	8.93299	22.0939	100	59.6522	64.00:-:-:-:-:-:-:-:-:-:-:-:-:64.00:-:64.00:64.00:64.00:64.00:-:-	24911	Transmembrane p24 trafficking protein 10 OS=Sus scrofa GN=TMED10 PE=1 SV=2	Transmembrane p24 trafficking protein 10	TMED10	TMED10	Transmembrane p24 trafficking protein 10
1209	9387	tr|F1S340|F1S340_PIG	F1S340	SRI	27.31	11	2	2		92.0506	63.5499	32.7283	0	0	7.99921	0	0	37.9654	0	0	0	0	100	0	15.9984	0	50.6742	0	77.0561	0	64.00:64.00:-:-:64.00:-:-:64.00:-:-:-:64.00:-:64.00:-:64.00:-:64.00:-:64.00:-	21733	Sorcin isoform 2 OS=Sus scrofa GN=SRI PE=1 SV=1	Sorcin isoform 2	SRI	SRI	Sorcin isoform 2
1310	9307	tr|F1S3E0|F1S3E0_PIG	F1S3E0	TMED9	41.48	6	2	2		0	0	0	0	0	0	0	0	0	0	0	0	0	0	0	4.66533	0	9.33066	0	100	0	-:-:-:-:-:-:-:-:-:-:-:-:-:64.00:-:64.00:-:64.00:-:-:-	28462	Transmembrane p24 trafficking protein 9 OS=Sus scrofa GN=TMED9 PE=1 SV=2	Transmembrane p24 trafficking protein 9	TMED9	TMED9	Transmembrane p24 trafficking protein 9
385	9147	tr|F1S3G7|F1S3G7_PIG	F1S3G7	COL5A3	200	2	2	2		0	0	0	96.702	0	0	57.116	0	0	100	0	0	28.8139	0	0	14.407	0	0	69.0111	80.7142	77.6527	-:-:64.00:-:-:64.00:-:-:64.00:-:-:-:-:64.00:-:-:64.00:64.00:64.00:-:64.00	158185	collagen type V alpha 3 chain OS=Sus scrofa GN=COL5A3 PE=4 SV=2	collagen type V alpha 3 chain	COL5A3	COL5A3	collagen type V alpha 3 chain
281	8496	tr|F1S3J7|F1S3J7_PIG	F1S3J7	PAPLN	200	11	12	7	Deamidation (NQ)	28.8	71.2548	64.0857	75.199	0	57.5999	71.3546	73.3259	92.3999	75.7189	73.8448	93.0886	69.42	0	0	0	67.1502	79.3053	88.2102	100	95.769	64.00:64.00:64.00:-:64.00:64.00:64.00:64.00:64.00:64.00:64.00:-:-:-:64.00:64.00:64.00:64.00:64.00:64.00:64.00	140807	papilin, proteoglycan like sulfated glycoprotein OS=Sus scrofa GN=PAPLN PE=1 SV=2	papilin, proteoglycan like sulfated glycoprotein	PAPLN	PAPLN	papilin, proteoglycan like sulfated glycoprotein
960	9128	tr|F1S3U9|F1S3U9_PIG	F1S3U9	PRDX1	200	16	3	3		67.3251	65.5029	70.1377	0	0	67.2475	0	0	0	71.234	0	0	0	74.8385	64.9399	72.7068	32.4699	0	71.0521	100	79.5695	64.00:64.00:-:-:64.00:-:-:-:64.00:-:-:64.00:64.00:64.00:64.00:-:64.00:64.00:64.00:64.00:-	21966	Peroxiredoxin 1 OS=Sus scrofa GN=PRDX1 PE=1 SV=2	Peroxiredoxin 1	PRDX1	PRDX1	Peroxiredoxin 1
769	9135	tr|F1S418|F1S418_PIG	F1S418	PRDX3	36.54	13	3	2		0	100	73.6315	0	12.9466	0	0	0	85.9113	0	0	0	62.6513	25.8931	0	50.2297	0	62.018	0	0	0	64.00:22.43:0:1.00:0:0:0:18.51:0:0:0:1.88:0:9.61:0:24.33:0:0:0:0:18.22	28471	Peroxiredoxin 3 OS=Sus scrofa GN=PRDX3 PE=1 SV=1	Peroxiredoxin 3	PRDX3	PRDX3	Peroxiredoxin 3
550	8765	tr|F1S441|F1S441_PIG	F1S441	CANX	200	17	7	6		0.615455	88.6203	55.3482	0	77.6437	1.23091	49.7522	0	0	0	0	0	52.0314	3.22631	45.3859	73.9184	39.8302	68.3452	30.8362	100	71.011	1.49:0.20:0:1.00:0.04:0.21:0:0:0:0:0:0.02:0.19:0.88:0.14:0.84:0.14:1.49:0.34:0.03:0.27	67597	Calnexin OS=Sus scrofa GN=CANX PE=1 SV=1	Calnexin	CANX	CANX	Calnexin
430	8609	tr|F1S4N8|F1S4N8_PIG	F1S4N8	VIT	200	19	7	7	Deamidation (NQ)	0	0	0	78.4984	0	0	68.3942	0	0	95.1892	0	0	26.3042	61.5273	0	0	0	0	52.6084	57.6299	100	-:-:64.00:-:-:64.00:-:-:64.00:-:-:64.00:-:-:-:-:64.00:64.00:64.00:-:64.00	61701	Vitrin OS=Sus scrofa GN=VIT PE=4 SV=2	Vitrin	VIT	VIT	Vitrin
261	8827	tr|F1S571|F1S571_PIG	F1S571	COL11A1	200	3	5	4	Deamidation (NQ)	0	70.1325	0	80.8317	0	36.4105	64.6997	0	43.4602	69.9582	0	0	56.4112	33.7145	0	16.8573	0	55.8573	69.9196	93.3806	100	64.00:-:64.00:-:64.00:64.00:-:64.00:64.00:-:-:64.00:-:64.00:-:64.00:64.00:64.00:64.00:-:64.00	158575	Collagen type XI alpha 1 chain OS=Sus scrofa GN=COL11A1 PE=4 SV=2	Collagen type XI alpha 1 chain	COL11A1	COL11A1	Collagen type XI alpha 1 chain
503	9017	tr|F1S5J5|F1S5J5_PIG	F1S5J5	HABP2	200	8	5	5		0	0	0	88.2606	0	0	73.585	0	0	82.3844	0	0	65.4196	49.2155	0	0	63.7531	24.6077	77.5254	75.8771	100	-:-:64.00:-:-:64.00:-:-:64.00:-:-:64.00:-:-:64.00:64.00:64.00:64.00:64.00:-:64.00	61865	hyaluronan binding protein 2 OS=Sus scrofa GN=HABP2 PE=1 SV=2	hyaluronan binding protein 2	HABP2	HABP2	hyaluronan binding protein 2
259	8607	tr|F1S5P1|F1S5P1_PIG	F1S5P1	COL17A1	87.19	8	7	4	Deamidation (NQ)	0	88.5122	0	0	61.4985	0	0	0	74.5821	35.5302	0	17.7651	0	38.53	0	63.179	95.8755	66.2315	65.5189	83.786	100	1.90:0:0:1.00:0:0:0:0.37:0.46:0:0.08:0.45:0:1.12:2.53:1.54:1.70:0.94:1.45:0:0	108573	Collagen type XVII alpha 1 chain OS=Sus scrofa PE=4 SV=2	Collagen type XVII alpha 1 chain	COL17A1	COL17A1	Collagen type XVII alpha 1 chain
346	8757	tr|F1S682|F1S682_PIG	F1S682	QSOX1	200	7	4	4		16.352	0	7.18499	63.7318	3.5925	0	61.607	54.9684	86.3475	71.6414	61.4563	100	0	69.6384	0	36.014	0	0	57.87	0	0	0:0.81:64.00:1.00:0:55.54:39.17:64.00:64.00:42.28:64.00:64.00:0:11.11:0:0:64.00:0:0:3.15:0	81478	Sulfhydryl oxidase OS=Sus scrofa GN=QSOX1 PE=1 SV=2	Sulfhydryl oxidase	QSOX1	QSOX1	Sulfhydryl oxidase
310	8808	tr|F1S6B5|F1S6B5_PIG	F1S6B5	FMOD	200	21	5	5	Deamidation (NQ); Pyro-glu from Q; Phosphorylation (STY)	0	0	0	10.9243	37.924	0	70.8435	0	0	48.6954	82.4103	0	0	42.8134	0	5.46215	28.8317	38.3456	83.3872	100	82.0296	0:0:0.10:1.00:0:11.93:0:0:2.35:23.41:0:1.31:0:0.08:0.44:1.39:59.43:64.00:16.40:0:0	43590	Fibromodulin OS=Sus scrofa GN=FMOD PE=1 SV=2	Fibromodulin	FMOD	FMOD	Fibromodulin
913	9820	tr|F1S6Q7|F1S6Q7_PIG	F1S6Q7	ATP5D	200	38	3	3	Deamidation (NQ); Pyro-glu from Q	21.7204	85.3573	61.2511	85.0782	0	0	0	0	0	94.3779	0	0	73.9954	70.7514	0	43.4407	0	74.9372	81.1793	100	82.9997	64.00:64.00:64.00:-:-:-:-:-:64.00:-:-:64.00:-:64.00:-:64.00:64.00:64.00:64.00:64.00:64.00	17475	ATP synthase subunit delta mitochondrial OS=Sus scrofa GN=ATP5D PE=1 SV=1	ATP synthase subunit delta mitochondrial	ATP5D	ATP5D	ATP synthase subunit delta mitochondrial
571	8974	tr|F1S6R7|F1S6R7_PIG	F1S6R7	PTBP1	200	16	4	4		0	64.4882	0	32.2441	0	0	0	0	75.1562	0	0	0	0	0	0	0	0	64.9742	77.681	100	85.4714	64.00:-:64.00:-:-:-:-:64.00:-:-:-:-:-:-:-:64.00:64.00:64.00:64.00:-:-	59706	Polypyrimidine tract-binding protein 1 OS=Sus scrofa GN=PTBP1 PE=1 SV=2	Polypyrimidine tract-binding protein 1	PTBP1	PTBP1	Polypyrimidine tract-binding protein 1
402	8983	tr|F1S707|F1S707_PIG	F1S707	TNN	200	14	5	5	Deamidation (NQ)	0	0	0	0	0	0	0	0	38.2757	0	35.3234	32.7813	0	0	0	0	0	16.3906	83.3209	100	92.9748	-:-:-:-:-:-:-:64.00:-:64.00:64.00:-:-:-:-:64.00:64.00:64.00:64.00:-:-	51613	tenascin N OS=Sus scrofa GN=LOC102163961 PE=4 SV=2	tenascin N	LOC102163961	TNN	tenascin N
460	8655	tr|F1S708|F1S708_PIG	F1S708	TNN	200	10	8	8	Deamidation (NQ)	0	12.4813	0	24.9626	0	0	0	57.5791	81.7797	0	0	81.0761	0	32.365	0	0	0	0	78.136	100	71.3966	64.00:-:64.00:-:-:-:64.00:64.00:-:-:64.00:64.00:-:-:-:-:64.00:64.00:64.00:-:-	141654	Tenascin N OS=Sus scrofa GN=TNN PE=4 SV=2	Tenascin N	TNN	TNN	Tenascin N
685	8971	tr|F1S814|F1S814_PIG	F1S814	PGM1	13.5	8	2	2	Deamidation (NQ)	0	0	100	0	0	0	0	0	0	0	0	0	0	0	0	0	0	0	0	0	0	-:64.00:-:-:-:-:-:-:-:-:-:-:-:-:-:-:-:-:-:-:-	61620	Phosphoglucomutase 1 OS=Sus scrofa GN=PGM1 PE=1 SV=2	Phosphoglucomutase 1	PGM1	PGM1	Phosphoglucomutase 1
712	9481	tr|F1S868|F1S868_PIG	F1S868	RSPO4	200	5	2	2		0	36.6101	45.279	100	45.6849	0	71.9032	35.7671	0	78.4845	48.732	55.6209	42.9573	14.1238	2.67296	0	5.34592	0	0	0	0	0.48:0.61:27.34:1.00:0:4.48:0.51:0:8.01:0.78:0.55:0.12:0.06:0:0.07:0:0:0:0:0:0.82	24334	R-spondin 4 OS=Sus scrofa GN=RSPO4 PE=4 SV=2	R-spondin 4	RSPO4	RSPO4	R-spondin 4
443	8924	tr|F1S8L9|F1S8L9_PIG	F1S8L9	HNRNPU	200	8	4	4	Deamidation (NQ)	0	70.8273	0	79.1645	0	0	47.1588	0	0	59.0993	0	0	49.6213	0	0	48.7695	23.5794	69.0044	63.0411	100	96.7163	64.00:-:64.00:-:-:64.00:-:-:64.00:-:-:-:-:64.00:64.00:64.00:64.00:64.00:64.00:-:64.00	86839	Heterogeneous nuclear ribonucleoprotein U OS=Sus scrofa GN=HNRNPU PE=1 SV=2	Heterogeneous nuclear ribonucleoprotein U	HNRNPU	HNRNPU	Heterogeneous nuclear ribonucleoprotein U
526	8740	tr|F1S8Y5|F1S8Y5_PIG	F1S8Y5	PGAM1	124.48	29	6	5	Oxidation (M); Deamidation (NQ)	0	81.5084	100	0	0	29.1893	0	14.5947	63.9568	0	39.7126	62.2779	0	0	0	0	0	0	0	0	0	64.00:64.00:-:-:64.00:-:64.00:64.00:-:64.00:64.00:-:-:-:-:-:-:-:-:-:-	29301	Phosphoglycerate mutase OS=Sus scrofa GN=PGAM1 PE=1 SV=2	Phosphoglycerate mutase	PGAM1	PGAM1	Phosphoglycerate mutase
912	8998	tr|F1S935|F1S935_PIG	F1S935	RPL18A	200	11	3	3		0	71.6102	0	0	0	0	0	0	0	0	0	0	0	0	0	51.9762	0	59.2711	87.4055	100	25.9881	64.00:-:-:-:-:-:-:-:-:-:-:-:-:64.00:-:64.00:64.00:64.00:64.00:-:-	26047	Ribosomal protein L18a OS=Sus scrofa GN=RPL18A PE=1 SV=2	Ribosomal protein L18a	RPL18A	RPL18A	Ribosomal protein L18a
658	9220	tr|F1S9A4|F1S9A4_PIG	F1S9A4	NUCB2	200	10	3	3	Deamidation (NQ)	55.9935	65.814	71.0621	100	37.0486	69.0532	0	0	93.944	93.72	0	99.9319	72.8991	57.6981	48.5891	18.5243	51.7697	46.8724	61.4046	61.1276	81.3198	6.99:7.47:64.00:1.00:19.93:0:0:15.87:61.22:0:28.40:3.95:2.27:0.27:2.69:2.75:8.92:2.81:11.83:4.97:13.24	50022	Nucleobindin 2 OS=Sus scrofa GN=NUCB2 PE=1 SV=1	Nucleobindin 2	NUCB2	NUCB2	Nucleobindin 2
1079	9069	tr|F1S9K5|F1S9K5_PIG	F1S9K5	EPRS	37.66	2	2	2		0	0	0	0	0	0	0	0	0	0	0	0	0	0	0	0	0	0	50	100	0	-:-:-:-:-:-:-:-:-:-:-:-:-:-:-:-:64.00:64.00:-:-:-	170136	Glutamyl-prolyl-tRNA synthetase OS=Sus scrofa GN=EPRS PE=1 SV=1	Glutamyl-prolyl-tRNA synthetase	EPRS	EPRS	Glutamyl-prolyl-tRNA synthetase
229	8414	tr|F1S9Q3|F1S9Q3_PIG	F1S9Q3	HSPA1L	140.85	28	13	3	Oxidation (M); Deamidation (NQ)	0	71.0332	58.551	40.1585	0	5.36215	64.1122	0	0	0	0	0	0	29.2128	0	10.7243	0	0	0	74.8776	100	64.00:64.00:64.00:-:64.00:64.00:-:-:-:-:-:64.00:-:64.00:-:-:-:64.00:64.00:-:-	71210	Heat shock 70 kDa protein 1-like OS=Sus scrofa GN=HSPA1L PE=1 SV=2	Heat shock 70 kDa protein 1-like	HSPA1L	HSPA1L	Heat shock 70 kDa protein 1-like
500	9115	tr|F1S9Y8|F1S9Y8_PIG	F1S9Y8	DYNCH	200	4	4	3		0	8.66614	0	17.3323	0	0	0	0	0	0	0	0	0	0	0	91.4707	0	42.5315	87.8252	100	95.0113	64.00:-:64.00:-:-:-:-:-:-:-:-:-:-:64.00:-:64.00:64.00:64.00:64.00:-:-	163669	Uncharacterized protein OS=Sus scrofa PE=1 SV=2	obsolete	DYNCH	DYNCH	Dynein	Uniprot listed as obsolete, NIH Smart Blast associates with cytoplasmic dynein heavy chain
845	9100	tr|F1SA40|F1SA40_PIG	F1SA40	ATP6V1D	13.26	16	2	2		0	100	0	0	0	0	0	0	0	0	0	0	50	0	0	0	0	0	0	0	0	64.00:-:-:-:-:-:-:-:-:-:-:-:-:-:-:-:-:-:-:-:64.00	28253	ATPase H+ transporting V1 subunit D OS=Sus scrofa GN=ATP6V1D PE=1 SV=1	ATPase H+ transporting V1 subunit D	ATP6V1D	ATP6V1D	ATPase H+ transporting V1 subunit D
741	9000	tr|F1SAK6|F1SAK6_PIG	F1SAK6	ATP5L	200	49	4	4		10.4882	100	0	20.9764	0	0	0	0	61.8337	0	0	0	33.7361	61.761	0	57.0629	0	62.5081	0	68.1143	61.358	64.00:-:64.00:-:-:-:-:64.00:-:-:-:64.00:-:64.00:-:64.00:-:64.00:64.00:64.00:64.00	11331	ATP synthase membrane subunit g OS=Sus scrofa GN=ATP5L PE=1 SV=1	ATP synthase membrane subunit g	ATP5L	ATP5L	ATP synthase membrane subunit g
1110	9699	tr|F1SBE5|F1SBE5_PIG	F1SBE5	PTGIS	32.71	8	2	2		0	0	0	0	0	0	0	0	0	0	0	0	0	0	0	0	0	0	50	100	0	-:-:-:-:-:-:-:-:-:-:-:-:-:-:-:-:64.00:64.00:-:-:-	57997	Prostaglandin I2 synthase OS=Sus scrofa GN=PTGIS PE=1 SV=1	Prostaglandin I2 synthase	PTGIS	PTGIS	Prostaglandin I2 synthase
410	8731	tr|F1SBN7|F1SBN7_PIG	F1SBN7	ATP5F1	200	20	5	5	Deamidation (NQ)	45.1703	100	0	72.0653	0	0	67.0045	0	72.166	67.1571	22.5852	54.1469	50.7875	73.8439	0	73.8019	0	78.0211	0	0	0	64.00:-:64.00:-:-:64.00:-:64.00:64.00:64.00:64.00:64.00:-:64.00:-:64.00:-:-:-:64.00:64.00	28627	ATP synthase H+ transporting mitochondrial Fo complex subunit B1 OS=Sus scrofa GN=ATP5F1 PE=1 SV=1	ATP synthase H+ transporting mitochondrial Fo complex subunit B1	ATP5F1	ATP5F1	ATP synthase H+ transporting mitochondrial Fo complex subunit B1
126	8405	tr|F1SBR6|F1SBR6_PIG	F1SBR6	OLFML3	200	46	18	18	Carbamidomethylation; Oxidation (M); Deamidation (NQ); Pyro-glu from Q	24.5688	0	46.7354	100	12.2844	0	91.9538	0	0	96.6932	0	0	75.6932	0	0	41.8919	61.9785	29.5178	95.2379	86.3905	93.6681	0:13.20:64.00:1.00:0:64.00:0:0:64.00:0:0:0:0:14.62:64.00:6.18:64.00:64.00:64.00:3.71:64.00	45926	Olfactomedin like 3 OS=Sus scrofa GN=OLFML3 PE=1 SV=1	Olfactomedin like 3	OLFML3	OLFML3	Olfactomedin like 3
574	8730	tr|F1SBX2|F1SBX2_PIG	F1SBX2	SEMA3E	200	7	4	4		0	0	0	95.4798	0	0	78.0962	0	0	100	0	0	56.0547	29.0393	0	26.2824	0	13.1412	0	0	0	-:-:64.00:-:-:64.00:-:-:64.00:-:-:64.00:-:64.00:-:64.00:-:-:-:-:64.00	84923	Semaphorin 3E OS=Sus scrofa GN=SEMA3E PE=3 SV=2	Semaphorin 3E	SEMA3E	SEMA3E	Semaphorin 3E
1211	9842	tr|F1SBX4|F1SBX4_PIG	F1SBX4	SEMA3D	200	5	2	2		19.4484	75.1562	61.663	98.4362	0	70.0691	82.1573	0	0	99.7332	0	0	77.9244	0	9.72419	40.1324	36.4598	78.1591	85.9001	100	77.4845	64.00:64.00:64.00:-:64.00:64.00:-:-:64.00:-:-:-:64.00:64.00:64.00:64.00:64.00:64.00:64.00:64.00:64.00	48676	Semaphorin 3D OS=Sus scrofa PE=4 SV=2	Semaphorin 3D	SEMA3D	SEMA3D	Semaphorin 3D
297	8605	tr|F1SC20|F1SC20_PIG	F1SC20	A1BG	200	26	6	6	Deamidation (NQ)	72.8816	80.1129	86.1899	56.5705	42.3401	0	0	0	0	72.7677	0	0	85.5101	77.5644	23.1366	48.4726	11.5683	72.1138	76.6184	100	85.4593	17.14:20.23:2.59:1.00:0:0:0:0:10.94:0:0:14.33:0.21:1.73:0.08:14.21:22.85:46.84:14.27:14.10:29.75	54397	Alpha-1B-glycoprotein OS=Sus scrofa GN=A1BG PE=1 SV=1	Alpha-1B-glycoprotein	A1BG	A1BG	Alpha-1B-glycoprotein
716	8987	tr|F1SC47|F1SC47_PIG	F1SC47	ALDH18A1	200	8	4	4		0	0	0	0	0	0	0	0	0	0	0	0	0	0	0	0	0	0	4.17066	100	2.08533	-:-:-:-:-:-:-:-:-:-:-:-:-:-:-:-:64.00:64.00:64.00:-:-	87086	Delta-1-pyrroline-5-carboxylate synthase OS=Sus scrofa GN=ALDH18A1 PE=1 SV=1	Delta-1-pyrroline-5-carboxylate synthase	ALDH18A1	ALDH18A1	Delta-1-pyrroline-5-carboxylate synthase
352	8634	tr|F1SC82|F1SC82_PIG	F1SC82	MYOF	64	5	7	6		0	100	0	0	0	0	0	0	0	0	0	0	0	0	0	48.3736	0	96.7471	0	0	0	64.00:-:-:-:-:-:-:-:-:-:-:-:-:64.00:-:64.00:-:-:-:-:-	231511	Uncharacterized protein OS=Sus scrofa PE=1 SV=2	Myoferlin	MYOF	MYOF	Myoferlin
110	8389	tr|F1SCC6|F1SCC6_PIG	F1SCC6	SERPINA38	200	44	17	12	Carbamidomethylation; Oxidation (M); Deamidation (NQ)	77.7776	44.923	85.2537	18.9356	6.21745	39.8809	17.6987	43.9654	99.2592	0	45.0118	100	36.1289	95.8177	86.7705	65.6997	96.6278	63.5016	3.10873	75.3484	15.7706	2.96:7.83:1.26:1.00:5.69:1.21:3.19:4.91:0:2.23:5.84:15.45:12.91:7.13:16.62:8.39:1.37:4.44:0.63:12.36:2.53	46997	serpin A3-8 OS=Sus scrofa GN=LOC100153899 PE=1 SV=2	serpin A3-8	LOC100153899	SERPINA38	serpin A3-8
123	8462	tr|F1SCC7|F1SCC7_PIG	F1SCC7	SERPINA36	200	36	15	3	Oxidation (M); Deamidation (NQ); Pyro-glu from Q	60.6357	69.8545	0	17.2851	0	36.5818	8.64253	0	0	0	0	0	41.812	100	64.9855	55.675	77.4121	64.1207	0	73.4896	48.1187	64.00:-:64.00:-:64.00:64.00:-:-:-:-:-:64.00:64.00:64.00:64.00:64.00:-:64.00:64.00:64.00:64.00	46677	serpin A3-6 OS=Sus scrofa GN=LOC100156325 PE=1 SV=1	serpin A3-6	LOC100156325	SERPINA36	serpin A3-6
71	8371	tr|F1SCD0|F1SCD0_PIG	F1SCD0	SERPINA38	200	56	25	14	Oxidation (M); Deamidation (NQ); Pyro-glu from Q; HexNAcylation (N)	84.3013	89.0334	74.0764	55.8669	46.7407	23.3704	69.2044	66.5858	96.0891	54.1656	88.0739	100	71.0496	94.238	89.8059	75.2124	98.3376	75.4618	55.2501	91.0747	63.7694	6.50:2.32:1.30:1.00:0.63:2.45:2.47:2.66:1.40:4.66:3.71:8.52:7.71:4.16:10.87:5.32:2.27:4.06:1.06:7.56:3.11	46641	serpin A3-8 OS=Sus scrofa GN=LOC396685 PE=1 SV=1	serpin A3-8	LOC396685	SERPINA38	serpin A3-8
318	8520	tr|F1SCE3|F1SCE3_PIG	F1SCE3	SERPINA5	200	35	10	10	Oxidation (M)	78.4138	39.9326	57.9322	84.129	64.9521	17.4206	84.4076	48.4684	35.6049	75.2617	71.6722	76.4957	72.863	48.2798	98.8471	34.8411	100	67.5703	75.989	88.2083	96.7166	0.19:0.41:2.64:1.00:0.11:2.67:0.36:0.04:1.82:0.96:0.58:0.32:7.40:0.18:7.44:1.57:2.92:1.95:3.11:2.80:1.56	45793	Serpin family A member 5 OS=Sus scrofa GN=SERPINA5 PE=1 SV=1	Serpin family A member 5	SERPINA5	SERPINA5	Serpin family A member 5
505	8922	tr|F1SDQ5|F1SDQ5_PIG	F1SDQ5	EMILIN1	200	5	4	3		0	40.9849	0	74.6001	0	0	46.2753	0	0	69.9639	0	0	19.7023	53.2742	0	39.4046	0	41.7568	68.2343	100	87.1342	64.00:-:64.00:-:-:64.00:-:-:64.00:-:-:64.00:-:64.00:-:64.00:64.00:64.00:64.00:-:64.00	106561	Elastin microfibril interfacer 1 OS=Sus scrofa GN=EMILIN1 PE=1 SV=1	Elastin microfibril interfacer 1	EMILIN1	EMILIN1	Elastin microfibril interfacer 1
360	8610	tr|F1SDR7|F1SDR7_PIG	F1SDR7	YWHAB	200	32	7	3	Oxidation (M)	0	77.0297	100	0	0	44.3841	0	0	0	0	0	0	22.1921	0	0	99.6012	0	0	0	83.4293	0	64.00:64.00:-:-:64.00:-:-:-:-:-:-:-:-:64.00:-:-:-:64.00:-:-:64.00	28112	Tyrosine 3-monooxygenase tryptophan 5-monooxygenase activation protein beta OS=Sus scrofa GN=YWHAB PE=1 SV=1	Tyrosine 3-monooxygenase tryptophan 5-monooxygenase activation protein beta	YWHAB	YWHAB	Tyrosine 3-monooxygenase tryptophan 5-monooxygenase activation protein beta
333	8747	tr|F1SDX9|F1SDX9_PIG	F1SDX9	PRDX2	200	28	5	4		41.85	92.8451	88.2559	35.3079	7.70894	92.6239	29.2287	0	0	37.3313	0	49.7348	80.822	55.8112	41.3413	43.8538	15.4179	17.731	59.1752	100	87.5355	60.93:35.31:3.34:1.00:64.00:2.45:0:0:4.33:0:2.38:9.76:5.28:6.51:1.35:2.23:19.86:49.27:25.34:6.91:37.68	21880	Peroxiredoxin 2 OS=Sus scrofa GN=PRDX2 PE=1 SV=2	Peroxiredoxin 2	PRDX2	PRDX2	Peroxiredoxin 2
847	8975	tr|F1SE25|F1SE25_PIG	F1SE25	SLC20A2	200	16	4	4		0	100	0	0	0	0	0	0	77.5208	0	0	0	0	33.7721	0	0	0	67.5442	0	0	0	64.00:-:-:-:-:-:-:64.00:-:-:-:64.00:-:-:-:64.00:-:-:-:-:-	42594	Phosphate transporter OS=Sus scrofa PE=1 SV=2	Phosphate transporter	SLC20A2	SLC20A2	Phosphate transporter
465	8621	tr|F1SEH4|F1SEH4_PIG	F1SEH4	HTRA1	200	20	7	7	Deamidation (NQ)	0	60.9294	0	52.5232	40.0876	58.2989	37.4597	0	0	41.1188	0	0	0	18.7298	0	45.052	51.2869	58.5777	54.7183	77.62	100	5.06:0:2.43:1.00:9.09:0.67:0:0:1.07:0:0:0.14:0:1.62:2.38:6.47:5.25:11.79:64.00:0:0	55583	HtrA serine peptidase 1 OS=Sus scrofa GN=HTRA1 PE=1 SV=2	HtrA serine peptidase 1	HTRA1	HTRA1	HtrA serine peptidase 1
321	8495	tr|F1SEN1|F1SEN1_PIG	F1SEN1	ANXA8	200	46	12	12	Oxidation (M); Deamidation (NQ)	20.6913	92.1357	100	70.4607	0	63.6422	42.1804	0	0	82.9105	0	0	84.3061	73.1899	0	97.4727	0	54.4581	41.3827	96.1801	0	64.00:64.00:64.00:-:64.00:64.00:-:-:64.00:-:-:64.00:-:64.00:-:64.00:64.00:64.00:-:64.00:64.00	36729	Annexin OS=Sus scrofa GN=ANXA8 PE=1 SV=1	Annexin	ANXA8	ANXA8	Annexin
884	9090	tr|F1SEN2|F1SEN2_PIG	F1SEN2	GLUD1	141.22	7	3	3		0	47.449	5.81371	0	0	0	0	0	0	0	0	0	0	11.6274	0	0	0	21.4157	0	100	0	64.00:64.00:-:-:-:-:-:-:-:-:-:64.00:-:-:-:64.00:-:64.00:-:-:-	61308	Glutamate dehydrogenase 1 mitochondrial OS=Sus scrofa GN=GLUD1 PE=1 SV=1	Glutamate dehydrogenase 1 mitochondrial	GLUD1	GLUD1	Glutamate dehydrogenase 1 mitochondrial
347	9199	tr|F1SEV8|F1SEV8_PIG	F1SEV8	EEF1D	200	7	4	2		0	68.4433	27.2634	0	14.4976	0	0	0	0	0	0	0	0	0	0	7.24879	0	42.4738	46.1191	92.4368	100	15.36:1.24:0:1.00:0:0:0:0:0:0:0:0:0:0.72:0:5.99:8.22:31.38:45.21:0:0	70158	eukaryotic translation elongation factor 1 delta OS=Sus scrofa GN=EEF1D PE=1 SV=2	eukaryotic translation elongation factor 1 delta	EEF1D	EEF1D	eukaryotic translation elongation factor 1 delta
595	8954	tr|F1SF43|F1SF43_PIG	F1SF43	GJA1	131.82	20	5	5	Oxidation (M); Deamidation (NQ); Pyro-glu from Q	0	100	1.34364	0	47.5177	0	0	43.9051	0	0	0	0	2.68729	16.265	0	20.0804	0	57.9147	0	0	0	13.26:0.06:0:1.00:0:0:0.79:0:0:0:0:0.17:0:0.25:0:2.31:0:0:0:0:0.09	43077	Gap junction protein OS=Sus scrofa GN=GJA1 PE=3 SV=1	Gap junction protein	GJA1	GJA1	Gap junction protein
15	8339	tr|F1SFA7|F1SFA7_PIG	F1SFA7	COL1A2	200	40	63	29	Carbamidomethylation; Oxidation (M); Deamidation (NQ); Pyro-glu from Q; HexNAcylation (N); Phosphorylation (STY)	22.7246	14.7217	41.7259	85.2011	34.8864	7.36084	82.1397	54.6484	77.9691	82.6651	50.0502	78.5145	79.6611	43.8921	34.7463	27.5459	77.6767	65.7424	86.433	100	96.9521	0.10:1.28:64.00:1.00:0.11:64.00:7.51:22.60:64.00:3.14:27.66:2.25:0.97:0.49:64.00:33.82:64.00:64.00:64.00:0.35:64.00	129160	Collagen alpha 2I chain OS=Sus scrofa GN=COL1A2 PE=1 SV=1	Collagen alpha 2I chain	COL1A2	COL1A2	Collagen alpha 2I chain
458	8842	tr|F1SFF3|F1SFF3_PIG	F1SFF3	NID2	200	9	5	5	Deamidation (NQ)	0	24.0356	42.8511	90.3642	0	0	67.3186	0	0	100	0	0	0	61.5724	0	42.389	12.0178	28.2274	74.2096	73.605	0	64.00:64.00:64.00:-:-:64.00:-:-:64.00:-:-:64.00:-:64.00:64.00:64.00:64.00:64.00:-:-:-	151765	Nidogen 2 OS=Sus scrofa GN=NID2 PE=1 SV=2	Nidogen 2	NID2	NID2	Nidogen 2
227	8648	tr|F1SFI5|F1SFI5_PIG	F1SFI5	HRG	200	17	11	11		55.349	81.9519	74.4539	100	25.6173	66.0205	92.741	0	63.8475	97.7589	0	72.3303	85.2321	69.4416	56.2294	51.2346	65.978	70.1914	86.9508	87.4122	78.5723	64.00:32.50:64.00:1.00:50.72:64.00:0:5.50:64.00:0:12.62:30.40:11.64:8.44:24.05:49.46:64.00:64.00:33.86:13.82:64.00	61536	Histidine rich glycoprotein OS=Sus scrofa GN=HRG PE=1 SV=2	Histidine rich glycoprotein	HRG	HRG	Histidine rich glycoprotein
14	8382	tr|F1SFI7|F1SFI7_PIG	F1SFI7	AHSG	200	63	43	43	Carbamidomethylation; Oxidation (M); Deamidation (NQ); Pyro-glu from Q; Phosphorylation (STY)	53.6821	67.3266	66.9484	92.8755	26.662	56.1984	86.627	0	56.4029	89.8742	54.0703	67.6479	82.6282	58.2918	55.0048	53.3239	62.7203	57.5672	85.1802	88.1932	100	40.52:28.46:64.00:1.00:31.76:64.00:0:4.18:64.00:8.66:14.03:17.60:14.36:13.34:28.06:25.20:64.00:64.00:64.00:16.22:64.00	38431	Alpha-2-HS-glycoprotein OS=Sus scrofa GN=AHSG PE=1 SV=2	Alpha-2-HS-glycoprotein	AHSG	AHSG	Alpha-2-HS-glycoprotein
398	8878	tr|F1SFU5|F1SFU5_PIG	F1SFU5	S100A7L2	200	72	5	4	Carbamidomethylation; Oxidation (M); Deamidation (NQ)	85.2225	0	0	0	0	0	0	0	0	0	0	56.3709	0	100	60.6109	53.9776	0	0	0	13.3723	26.7445	-:-:-:-:-:-:-:-:-:-:64.00:64.00:64.00:64.00:-:-:-:64.00:64.00:64.00:-	11581	S100 calcium binding protein A7 like 2 OS=Sus scrofa GN=S100A7L2 PE=4 SV=2	S100 calcium binding protein A7 like 2	S100A7L2	S100A7L2	S100 calcium binding protein A7 like 2
1301	9853	tr|F1SFV3|F1SFV3_PIG	F1SFV3	S100A14	46.77	21	2	2		44.0511	0	0	41.7885	0	0	88.8681	91.2169	100	48.4737	94.4274	92.3323	20.8943	90.2779	0	96.8187	0	97.5345	0	87.9611	95.6854	-:-:64.00:-:-:64.00:64.00:64.00:64.00:64.00:64.00:64.00:-:64.00:-:64.00:-:64.00:64.00:64.00:64.00	11444	S100 calcium binding protein A14 OS=Sus scrofa GN=S100A14 PE=1 SV=1	S100 calcium binding protein A14	S100A14	S100A14	S100 calcium binding protein A14
307	8649	tr|F1SFZ8|F1SFZ8_PIG	F1SFZ8	TLN1	200	6	8	7	Deamidation (NQ)	62.785	72.3267	78.2781	0	55.5928	0	0	74.8938	100	27.7964	84.0057	90.3462	0	65.8	75.8625	67.3606	81.6742	0	72.8765	85.9384	85.4201	7.13:11.01:0:1.00:0:0:10.89:64.00:0.03:23.35:23.32:3.20:12.74:4.72:24.84:0:13.44:22.45:20.25:3.12:0	269465	Talin 1 OS=Sus scrofa GN=TLN1 PE=1 SV=2	Talin 1	TLN1	TLN1	Talin 1
568	9139	tr|F1SG41|F1SG41_PIG	F1SG41	ALDH1L2	200	5	2	2		0	0	0	0	0	0	0	0	0	1.04447	0	0	16.5865	0	0	2.08894	0	0	77.5151	100	81.5153	-:-:-:-:-:-:-:-:64.00:-:-:-:-:64.00:-:-:64.00:64.00:64.00:-:64.00	102704	10-formyltetrahydrofolate dehydrogenase OS=Sus scrofa GN=ALDH1L2 PE=1 SV=2	10-formyltetrahydrofolate dehydrogenase	ALDH1L2	ALDH1L2	10-formyltetrahydrofolate dehydrogenase
149	8431	tr|F1SGG2|F1SGG2_PIG	F1SGG2	KRT8	108.4	23	14	8		0	100	0	0	0	21.5795	0	0	86.4226	0	0	0	0	0	0	0	0	43.1589	0	75.752	0	64.00:-:-:-:64.00:-:-:64.00:-:-:-:-:-:-:-:64.00:-:64.00:-:-:-	54427	Keratin 8 type II OS=Sus scrofa GN=KRT8 PE=1 SV=1	Keratin 8 type II	KRT8	KRT8	Keratin 8 type II
55	8511	tr|F1SGG3|F1SGG3_PIG	F1SGG3	KRT1	200	16	20	11	Oxidation (M); Deamidation (NQ)	48.109	91.9742	97.3805	56.1995	46.5052	24.1109	50.7193	22.3379	64.7369	59.467	29.3784	62.1356	0.210169	61.5571	71.0757	60.2552	100	67.2911	0.420338	99.1668	96.4607	4.01:3.50:1.17:1.00:0.91:0.97:0.42:0.46:1.52:0.36:0.49:1.46:2.26:1.70:5.62:2.71:0.32:2.90:2.53:1.32:0.20	65249	Keratin 1 OS=Sus scrofa GN=KRT1 PE=1 SV=1	Keratin 1	KRT1	KRT1	Keratin 1
4	8337	tr|F1SGG6|F1SGG6_PIG	F1SGG6	KRT5	200	80	114	74	Carbamidomethylation; Oxidation (M); Deamidation (NQ); Pyro-glu from Q; HexNAcylation (N); Phosphorylation (STY)	28.5817	95.805	56.0028	42.5891	21.4843	6.74972	38.8472	13.4994	84.7136	40.9779	17.7953	29.5144	56.5135	27.5994	42.429	88.0663	42.4335	100	43.3552	89.7831	34.5238	64.00:12.83:5.34:1.00:0.53:3.81:0.47:63.12:5.40:0.47:0.59:1.50:6.14:64.00:5.76:64.00:10.26:64.00:1.46:2.33:20.83	63479	Keratin 5 OS=Sus scrofa GN=KRT5 PE=1 SV=2	Keratin 5	KRT5	KRT5	Keratin 5
16	8347	tr|F1SGG9|F1SGG9_PIG	F1SGG9	KRT6A	200	67	56	27	Carbamidomethylation; Oxidation (M); Deamidation (NQ); Pyro-glu from Q; HexNAcylation (N)	17.4469	100	53.8062	28.369	25.3868	0	7.33367	15.1842	68.894	6.75348	22.2837	0	40.0854	33.8046	41.9104	57.0395	22.502	58.3878	3.37674	30.3004	0	40.03:2.70:0.98:1.00:0:0.33:0.56:2.35:0.38:0.55:0:1.36:2.30:5.44:0.80:7.35:0.49:0.63:0:0.83:2.07	60070	keratin, type II cytoskeletal 6A OS=Sus scrofa GN=LOC100737483 PE=1 SV=2	keratin, type II cytoskeletal 6A	LOC100737483	KRT6A	keratin, type II cytoskeletal 6A
759	9103	tr|F1SGH5|F1SGH5_PIG	F1SGH5	PDHB	70.23	10	3	3		0	100	0	0	0	0	0	0	0	0	0	0	0	0	0	8.62655	0	4.31328	0	0	0	64.00:-:-:-:-:-:-:-:-:-:-:-:-:64.00:-:64.00:-:-:-:-:-	39273	Pyruvate dehydrogenase E1 component subunit beta OS=Sus scrofa GN=PDHB PE=1 SV=1	Pyruvate dehydrogenase E1 component subunit beta	PDHB	PDHB	Pyruvate dehydrogenase E1 component subunit beta
74	8479	tr|F1SGI7|F1SGI7_PIG	F1SGI7	KRT75	200	20	23	4	Carbamidomethylation; Deamidation (NQ); Pyro-glu from Q	92.0792	100	93.9443	49.2984	81.7811	14.4131	28.8262	0	0	40.489	51.1882	0	62.987	87.0464	92.7198	99.3282	92.3159	84.3038	47.5388	66.5744	61.9065	4.63:1.92:0.04:1.00:0.02:0.02:0:0:0.02:0.04:0:1.43:2.69:5.38:2.43:1.70:0.06:0.12:0.07:3.23:0.17	65109	Keratin 75 OS=Sus scrofa GN=KRT75 PE=1 SV=2	Keratin 75	KRT75	KRT75	Keratin 75
520	8638	tr|F1SGJ3|F1SGJ3_PIG	F1SGJ3	FLNB	200	14	5	5		0	98.9254	1.25475	2.5095	0	11.6777	0	0	100	0	58.3918	0	0	9.62926	0	58.7929	0	68.3613	0	25.3637	0	64.00:64.00:64.00:-:64.00:-:-:64.00:-:64.00:-:64.00:-:64.00:-:64.00:-:64.00:-:-:-	64441	Uncharacterized protein OS=Sus scrofa PE=1 SV=2	Filamin B	FLNB	FLNB	Filamin B
1329	9614	tr|F1SGR0|F1SGR0_PIG	F1SGR0	EIF3M	146.12	10	2	2		0	0	0	0	0	0	0	0	0	0	0	0	0	0	0	0	0	0	0	100	50	-:-:-:-:-:-:-:-:-:-:-:-:-:-:-:-:-:64.00:64.00:-:-	42516	Eukaryotic translation initiation factor 3 subunit M OS=Sus scrofa GN=EIF3M PE=1 SV=1	Eukaryotic translation initiation factor 3 subunit M	EIF3M	EIF3M	Eukaryotic translation initiation factor 3 subunit M
178	8398	tr|F1SH33|F1SH33_PIG	F1SH33	SERPIN1	200	50	17	17	Oxidation (M); Deamidation (NQ); Pyro-glu from Q	55.325	32.0044	0	0	0	0	0	0	0	0	0	0	0	42.0227	59.9184	10.1006	26.4546	20.2013	52.6098	68.7463	100	64.00:-:-:-:-:-:-:-:-:-:-:64.00:64.00:64.00:64.00:64.00:64.00:64.00:64.00:64.00:-	46440	Serpin family I member 1 OS=Sus scrofa GN=SERPINI1 PE=3 SV=1	Serpin family I member 1	SERPIN1	SERPIN1	Serpin family I member 1
924	8943	tr|F1SHD7|F1SHD7_PIG	F1SHD7	NDUFS1	99.2	6	3	3		0	100	0	41.9359	0	0	0	0	0	0	0	0	0	0	0	84.6934	0	83.8718	0	0	0	64.00:-:64.00:-:-:-:-:-:-:-:-:-:-:64.00:-:64.00:-:-:-:-:-	81089	NADH:ubiquinone oxidoreductase core subunit S1 OS=Sus scrofa GN=NDUFS1 PE=1 SV=2	NADH:ubiquinone oxidoreductase core subunit S1	NDUFS1	NDUFS1	NADH:ubiquinone oxidoreductase core subunit S1
147	8379	tr|F1SHL9|F1SHL9_PIG	F1SHL9	PKM	200	39	19	19	Carbamidomethylation; Oxidation (M)	24.6985	90.9468	83.0715	0	1.01425	80.4732	0	0	51.3067	0	18.8978	52.0329	78.12	2.0285	41.8808	41.0245	27.372	48.47	66.1103	100	75.2353	64.00:64.00:0:1.00:64.00:0:0:4.90:0:1.86:5.93:0.93:11.00:11.35:4.39:22.31:64.00:64.00:37.69:5.10:64.00	58723	Pyruvate kinase OS=Sus scrofa GN=PKM PE=1 SV=2	Pyruvate kinase	PKM	PKM	Pyruvate kinase
727	8937	tr|F1SHR3|F1SHR3_PIG	F1SHR3	ATP6V1E1	200	23	5	5	Deamidation (NQ)	62.1283	100	81.3024	0	61.5312	78.3403	0	0	89.7747	0	0	0	0	57.2232	74.9636	58.838	82.8313	0	0	87.3988	28.6116	34.50:4.16:0:1.00:9.71:0:0:3.76:0:0:0:0.58:3.56:0.82:7.10:0:0:5.82:0.02:1.33:0	26123	ATPase H+ transporting V1 subunit E1 OS=Sus scrofa GN=ATP6V1E1 PE=1 SV=1	ATPase H+ transporting V1 subunit E1	ATP6V1E1	ATP6V1E1	ATPase H+ transporting V1 subunit E1
223	8540	tr|F1SI77|F1SI77_PIG	F1SI77	CKMT1A	200	32	12	8	Carbamidomethylation; Oxidation (M)	0.643251	94.1178	50.9949	87.3871	1.2865	58.186	81.9626	63.884	100	95.0373	75.8728	88.0003	61.5679	0	0	76.3002	0	77.1464	56.2585	57.1524	0	64.00:10.89:64.00:1.00:50.74:64.00:34.73:64.00:64.00:46.74:42.21:0:0:64.00:0:64.00:35.73:12.02:0:1.21:30.91	46935	creatine kinase, mitochondrial 1A OS=Sus scrofa GN=LOC100519994 PE=1 SV=1	creatine kinase, mitochondrial 1A	LOC100519994	CKMT1A	creatine kinase, mitochondrial 1A
1319	9900	tr|F1SIE0|F1SIE0_PIG	F1SIE0	MTCH2	26.61	8	2	2		0	100	0	0	0	0	0	0	0	0	0	0	0	0	0	64.1105	0	49.0543	0	24.5272	0	64.00:-:-:-:-:-:-:-:-:-:-:-:-:64.00:-:64.00:-:64.00:-:-:-	33404	Mitochondrial carrier 2 OS=Sus scrofa GN=MTCH2 PE=1 SV=1	Mitochondrial carrier 2	MTCH2	MTCH2	Mitochondrial carrier 2
1081	9371	tr|F1SIF2|F1SIF2_PIG	F1SIF2	NDUFS3	25.21	10	2	2		0	88.8089	0	0	0	0	0	0	0	0	0	0	0	44.4045	0	100	0	92.271	0	0	88.9358	64.00:-:-:-:-:-:-:-:-:-:-:64.00:-:64.00:-:64.00:-:-:64.00:-:-	30201	NADH:ubiquinone oxidoreductase core subunit S3 OS=Sus scrofa GN=NDUFS3 PE=1 SV=1	NADH:ubiquinone oxidoreductase core subunit S3	NDUFS3	NDUFS3	NADH:ubiquinone oxidoreductase core subunit S3
758	8958	tr|F1SIG7|F1SIG7_PIG	F1SIG7	SCRN1	200	10	3	3		0	0	33.7082	100	26.6426	52.3411	47.3345	0	0	76.0306	0	0	66.4402	0	0	8.94471	17.8894	0	25.6036	0	0	0:0.96:64.00:1.00:9.09:2.91:0:0:19.26:0:0:0:0:0.37:0.54:0:1.42:0:0:0:10.69	47212	Secernin 1 OS=Sus scrofa GN=SCRN1 PE=1 SV=2	Secernin 1	SCRN1	SCRN1	Secernin 1
361	8852	tr|F1SJ34|F1SJ34_PIG	F1SJ34	COX5A	200	51	7	7	Deamidation (NQ)	30.7722	78.0379	0	0	0	0	0	0	69.1369	27.8632	0	0	44.7969	64.1493	0	63.856	0	59.4395	13.9316	71.3222	100	64.00:-:-:-:-:-:-:64.00:64.00:-:-:64.00:-:64.00:-:64.00:64.00:64.00:64.00:64.00:64.00	16748	Cytochrome c oxidase subunit 5A OS=Sus scrofa GN=COX5A PE=1 SV=1	Cytochrome c oxidase subunit 5A	COX5A	COX5A	Cytochrome c oxidase subunit 5A
1201	9621	tr|F1SJ93|F1SJ93_PIG	F1SJ93	RCN2	21.24	12	2	2		0	100	0	0	0	0	1.47986	0	0	0	97.1885	0	0	0	0	0	0	0	2.95972	79.8294	0	64.00:-:-:-:-:64.00:-:-:-:64.00:-:-:-:-:-:-:64.00:64.00:-:-:-	36740	Reticulocalbin 2 OS=Sus scrofa GN=RCN2 PE=1 SV=2	Reticulocalbin 2	RCN2	RCN2	Reticulocalbin 2
168	8481	tr|F1SJB5|F1SJB5_PIG	F1SJB5	ANXA1	200	45	14	4	Deamidation (NQ)	70.7655	35.3828	77.3691	83.3907	0	0	0	0	0	78.746	0	0	71.5857	98.8367	0	100	0	98.7026	97.1421	98.4012	0	64.00:64.00:64.00:-:-:-:-:-:64.00:-:-:64.00:-:64.00:-:64.00:64.00:64.00:-:64.00:64.00	38730	Annexin OS=Sus scrofa GN=ANXA1 PE=1 SV=2	Annexin A1	ANXA1	ANXA1	Annexin A1
442	8677	tr|F1SJJ5|F1SJJ5_PIG	F1SJJ5	RPL4	200	22	7	6		0	48.0382	0	10.823	0	0	0	0	0	47.0266	0	0	0	3.39769	0	6.79537	52.2042	39.0512	66.8021	90.0375	100	64.00:-:64.00:-:-:-:-:-:64.00:-:-:64.00:-:64.00:64.00:64.00:64.00:64.00:64.00:-:-	47919	60S ribosomal protein L4 OS=Sus scrofa GN=RPL4 PE=1 SV=2	60S ribosomal protein L4	RPL4	RPL4	60S ribosomal protein L4
680	9414	tr|F1SJM4|F1SJM4_PIG	F1SJM4	MME	200	5	3	3		2.99818	83.9023	0	0	0	0	0	0	0	0	0	0	0	0	0	0	0	5.99635	0	0	100	64.00:-:-:-:-:-:-:-:-:-:-:-:-:-:-:64.00:-:-:64.00:64.00:-	85811	Neprilysin OS=Sus scrofa GN=MME PE=1 SV=1	Neprilysin	MME	MME	Neprilysin
1100	9236	tr|F1SJS3|F1SJS3_PIG	F1SJS3	SCUBE1	85.49	4	2	2	Deamidation (NQ)	0	0	0	88.352	0	0	16.2089	0	0	100	0	0	39.884	0	0	32.4178	0	0	0	0	0	-:-:64.00:-:-:64.00:-:-:64.00:-:-:-:-:64.00:-:-:-:-:-:-:64.00	94087	Signal peptide CUB domain and EGF like domain containing 1 OS=Sus scrofa GN=SCUBE1 PE=4 SV=2	Signal peptide CUB domain and EGF like domain containing 1	SCUBE1	SCUBE1	Signal peptide CUB domain and EGF like domain containing 1
998	9548	tr|F1SJW8|F1SJW8_PIG	F1SJW8	SERPING1	23.35	6	2	2		0	11.7712	0	73.9153	0	0	0	0	0	53.779	0	0	52.8458	46.0219	0	0	32.2507	34.9742	23.5423	100	0	64.00:-:64.00:-:-:-:-:-:64.00:-:-:64.00:-:-:64.00:64.00:64.00:64.00:-:-:64.00	54526	Serpin family G member 1 OS=Sus scrofa GN=SERPING1 PE=1 SV=1	Serpin family G member 1	SERPING1	SERPING1	Serpin family G member 1
538	9280	tr|F1SJY6|F1SJY6_PIG	F1SJY6	CTNND1	200	4	3	3	Deamidation (NQ)	37.0375	67.2588	95.6126	0	7.44649	14.893	0	0	0	0	0	0	0	90.3307	53.0628	82.7943	72.5559	46.1251	0	100	86.5966	9.09:20.13:0:1.00:2.59:0:0:0:0:0:0:22.97:5.91:20.69:11.95:6.16:0:18.57:10.50:4.01:0	108133	Catenin delta 1 OS=Sus scrofa GN=CTNND1 PE=1 SV=2	Catenin delta 1	CTNND1	CTNND1	Catenin delta 1
534	8785	tr|F1SKF1|F1SKF1_PIG	F1SKF1	PLS1	200	12	4	2		0	0	0	69.0645	0	0	54.3873	0	0	67.8235	0	0	51.9146	0	0	0	0	25.9573	0	83.782	100	-:-:64.00:-:-:64.00:-:-:64.00:-:-:-:-:-:-:64.00:-:64.00:64.00:-:64.00	57283	Plastin 1 OS=Sus scrofa GN=PLS1 PE=1 SV=2	Plastin 1	PLS1	PLS1	Plastin 1
549	8794	tr|F1SKM0|F1SKM0_PIG	F1SKM0	UQCRC1	200	15	5	5	Deamidation (NQ)	66.0489	100	0	0	0	65.3673	32.6837	0	0	0	0	0	0	97.9241	0	86.4017	0	71.7563	0	84.7664	88.2675	64.00:-:-:-:64.00:64.00:-:-:-:-:-:64.00:-:64.00:-:64.00:-:64.00:64.00:64.00:-	52699	Ubiquinol-cytochrome c reductase core protein I OS=Sus scrofa GN=UQCRC1 PE=1 SV=1	Ubiquinol-cytochrome c reductase core protein I	UQCRC1	UQCRC1	Ubiquinol-cytochrome c reductase core protein I
201	8369	tr|F1SKM1|F1SKM1_PIG	F1SKM1	COL7A1	200	12	19	17	Oxidation (M)	27.2196	29.1474	12.0486	85.0537	68.0999	37.7367	86.098	87.9385	100	83.5793	66.1104	0	66.9286	0	31.1573	86.5651	6.02429	78.2355	66.0281	86.4938	95.8279	0.10:0.03:2.15:1.00:0.36:2.27:2.86:1.47:2.31:0.58:0:0:0.13:2.96:0.03:2.36:1.35:1.35:2.17:0.13:0.91	295200	Collagen type VII alpha 1 chain OS=Sus scrofa GN=COL7A1 PE=4 SV=1	Collagen type VII alpha 1 chain	COL7A1	COL7A1	Collagen type VII alpha 1 chain
260	8705	tr|F1SKM9|F1SKM9_PIG	F1SKM9	LGALS1	200	50	7	7	Carbamidomethylation; Deamidation (NQ)	51.5503	55.4774	25.0118	80.5317	48.1583	0	31.3555	0	0	81.6418	0	0	63.0935	57.154	45.7702	61.1954	12.5059	62.7044	89.6136	100	71.2065	1.63:0.08:14.44:1.00:0:0.19:0:0:18.60:0:0:1.93:0.80:3.34:0.04:4.82:57.82:46.24:3.53:1.68:3.60	14720	Galectin OS=Sus scrofa GN=LGALS1 PE=1 SV=1	Galectin	LGALS1	LGALS1	Galectin
641	8896	tr|F1SKR0|F1SKR0_PIG	F1SKR0	ACAN	200	3	4	4		28.01	56.0201	0	0	0	0	0	0	0	0	0	0	0	0	0	0	0	0	68.1514	100	78.0582	64.00:-:-:-:-:-:-:-:-:-:-:-:-:-:-:-:64.00:64.00:64.00:64.00:-	237572	Aggrecan core protein OS=Sus scrofa GN=ACAN PE=1 SV=2	Aggrecan core protein	ACAN	ACAN	Aggrecan core protein
908	8851	tr|F1SL07|F1SL07_PIG	F1SL07	NDUFA9	94.62	16	4	4		0	85.4249	0	0	0	0	100	0	0	93.8389	67.9795	0	0	0	0	59.952	0	75.309	0	0	29.976	64.00:-:-:-:-:64.00:-:-:64.00:64.00:-:-:-:64.00:-:64.00:-:-:64.00:-:-	42543	NADH:ubiquinone oxidoreductase subunit A9 OS=Sus scrofa GN=NDUFA9 PE=1 SV=2	NADH:ubiquinone oxidoreductase subunit A9	NDUFA9	NDUFA9	NADH:ubiquinone oxidoreductase subunit A9
489	8729	tr|F1SL54|F1SL54_PIG	F1SL54	COPB2	15.76	5	2	2		24.9955	76.3257	0	0	0	0	0	0	0	0	0	0	0	0	0	0	0	0	49.9909	100	79.4439	64.00:-:-:-:-:-:-:-:-:-:-:-:-:-:-:-:64.00:64.00:64.00:64.00:-	102346	Coatomer subunit beta' OS=Sus scrofa GN=COPB2 PE=1 SV=2	Coatomer subunit beta'	COPB2	COPB2	Coatomer subunit beta'
117	8362	tr|F1SLA0|F1SLA0_PIG	F1SLA0	ATP5B	200	52	18	18	Oxidation (M); Deamidation (NQ)	0	100	75.959	0	0	79.4697	0	0	84.9903	0	0	0	79.9697	0	0	79.7565	34.5085	90.4306	69.017	96.8203	87.2911	64.00:64.00:-:-:64.00:-:-:64.00:-:-:-:-:-:64.00:64.00:64.00:64.00:64.00:64.00:-:64.00	56336	ATP synthase subunit beta OS=Sus scrofa GN=ATP5B PE=1 SV=1	ATP synthase subunit beta	ATP5B	ATP5B	ATP synthase subunit beta
667	9531	tr|F1SLF0|F1SLF0_PIG	F1SLF0	SPR	22.45	15	2	2	Deamidation (NQ)	21.6086	69.3578	100	0	0	0	0	0	0	0	0	0	76.1499	0	0	0	0	0	43.2173	85.3473	0	64.00:64.00:-:-:-:-:-:-:-:-:-:-:-:-:-:-:64.00:64.00:-:64.00:64.00	28691	Sepiapterin reductase (7 8-dihydrobiopterin:NADP+ oxidoreductase) OS=Sus scrofa GN=SPR PE=1 SV=2	Sepiapterin reductase (7 8-dihydrobiopterin:NADP+ oxidoreductase)	SPR	SPR	Sepiapterin reductase (7 8-dihydrobiopterin:NADP+ oxidoreductase)
514	8702	tr|F1SLW8|F1SLW8_PIG	F1SLW8	A2ML1	200	6	6	5		100	0	0	0	0	0	0	0	0	0	0	0	0	93.9937	0	48.9577	0	24.4789	0	0	0	-:-:-:-:-:-:-:-:-:-:-:64.00:-:64.00:-:64.00:-:-:-:64.00:-	139038	Alpha-2-macroglobulin like 1 OS=Sus scrofa GN=A2ML1 PE=4 SV=2	Alpha-2-macroglobulin like 1	A2ML1	A2ML1	Alpha-2-macroglobulin like 1
862	9030	tr|F1SM78|F1SM78_PIG	F1SM78	MYL12B	200	23	3	3		0	71.1308	0	0	0	0	0	0	56.1945	0	0	0	99.2711	0	0	71.1181	63.5199	82.6592	88.345	100	28.0972	64.00:-:-:-:-:-:-:64.00:-:-:-:-:-:64.00:64.00:64.00:64.00:64.00:64.00:-:64.00	19779	Myosin light chain 12B OS=Sus scrofa GN=MYL12B PE=4 SV=2	Myosin light chain 12B	MYL12B	MYL12B	Myosin light chain 12B
338	8703	tr|F1SMC0|F1SMC0_PIG	F1SMC0	CAP1	200	27	7	6	Oxidation (M); Deamidation (NQ)	35.8496	25.2626	21.0265	24.2806	0	2.59765	0	20.9261	84.2405	5.19529	29.0095	64.1046	40.5336	52.4213	0	82.8633	37.5886	74.6451	59.3068	100	83.3157	64.00:64.00:64.00:-:64.00:-:64.00:64.00:64.00:64.00:64.00:64.00:-:64.00:64.00:64.00:64.00:64.00:64.00:64.00:64.00	40964	Adenylyl cyclase-associated protein OS=Sus scrofa PE=1 SV=1	Adenylyl cyclase-associated protein	CAP1	CAP1	Adenylyl cyclase-associated protein
253	8409	tr|F1SME1|F1SME1_PIG	F1SME1	C5	200	13	13	13	Deamidation (NQ)	0	68.0362	0	71.6764	0	0	36.6494	0	0	60.7846	0	0	0	83.8105	0	0	0	13.9619	27.9239	100	54.5699	64.00:-:64.00:-:-:64.00:-:-:64.00:-:-:64.00:-:-:-:64.00:64.00:64.00:64.00:-:-	180943	Complement C5a anaphylatoxin OS=Sus scrofa GN=C5 PE=1 SV=2	Complement C5a anaphylatoxin	C5	C5	Complement C5a anaphylatoxin
742	9231	tr|F1SMN1|F1SMN1_PIG	F1SMN1	CALU	200	12	3	3		0	0	0	0	0	0	0	0	0	0	0	0	0	0	0	0	0	0	50	100	0	-:-:-:-:-:-:-:-:-:-:-:-:-:-:-:-:64.00:64.00:-:-:-	37425	Calumenin OS=Sus scrofa GN=CALU PE=1 SV=2	Calumenin	CALU	CALU	Calumenin
531	9106	tr|F1SMN5|F1SMN5_PIG	F1SMN5	FLNC	200	1	2	2		0	91.9249	0	0	0	0	0	0	0	0	0	0	0	0	0	3.798	0	7.59601	0	100	57.5763	64.00:-:-:-:-:-:-:-:-:-:-:-:-:64.00:-:64.00:-:64.00:64.00:-:-	290411	Filamin C OS=Sus scrofa GN=FLNC PE=1 SV=1	Filamin C	FLNC	FLNC	Filamin C
445	8565	tr|F1SMW3|F1SMW3_PIG	F1SMW3	SERPINB5	200	28	9	9	Deamidation (NQ)	0	90.395	100	0	0	46.4539	0	0	0	12.6529	0	0	62.0171	52.4535	0	63.0191	79.9237	25.3058	41.8599	78.8532	51.8222	64.00:64.00:-:-:64.00:-:-:-:64.00:-:-:64.00:-:64.00:64.00:64.00:64.00:64.00:64.00:-:64.00	42131	Serpin family B member 5 OS=Sus scrofa GN=SERPINB5 PE=3 SV=1	Serpin family B member 5	SERPINB5	SERPINB5	Serpin family B member 5
1113	9381	tr|F1SMW8|F1SMW8_PIG	F1SMW8	SERPINB10	61.1	6	2	2		82.9099	0	0	0	0	0	0	0	0	0	0	0	0	100	0	41.455	0	0	0	0	0	-:-:-:-:-:-:-:-:-:-:-:64.00:-:64.00:-:-:-:-:-:64.00:-	45175	Serpin peptidase inhibitor clade B (ovalbumin) member 10 OS=Sus scrofa GN=SERPINB10 PE=3 SV=1	Serpin peptidase inhibitor clade B (ovalbumin) member 10	SERPINB10	SERPINB10	Serpin peptidase inhibitor clade B (ovalbumin) member 10
1226	9325	tr|F1SMZ6|F1SMZ6_PIG	F1SMZ6	HSPE1	43.26	25	2	2		45.0569	95.3087	91.4811	0	0	0	0	0	99.5363	0	0	0	90.1138	0	0	0	0	0	0	100	0	64.00:64.00:-:-:-:-:-:64.00:-:-:-:-:-:-:-:-:-:64.00:-:64.00:64.00	10960	heat shock protein family E (Hsp10) member 1 OS=Sus scrofa GN=HSPE1 PE=1 SV=1	heat shock protein family E (Hsp10) member 1	HSPE1	HSPE1	heat shock protein family E (Hsp10) member 1
364	8578	tr|F1SMZ7|F1SMZ7_PIG	F1SMZ7	HSPD1	200	23	9	9	Deamidation (NQ)	0	100	43.4239	0	0	27.0734	0	0	0	0	0	71.2186	0	81.7582	97.767	13.5367	0	67.5809	0	89.4971	0	64.00:64.00:-:-:64.00:-:-:-:-:-:64.00:64.00:64.00:64.00:-:64.00:-:64.00:-:-:-	61133	heat shock protein family D (Hsp60) member 1 OS=Sus scrofa GN=HSPD1 PE=1 SV=2	heat shock protein family D (Hsp60) member 1	HSPD1	HSPD1	heat shock protein family D (Hsp60) member 1
786	9184	tr|F1SMZ9|F1SMZ9_PIG	F1SMZ9	SF3B1	200	6	4	3		0	0	0	0	0	0	0	0	0	0	0	0	0	0	0	0	0	0	0	100	0	-:-:-:-:-:-:-:-:-:-:-:-:-:-:-:-:-:64.00:-:-:-	145743	Splicing factor 3b subunit 1 OS=Sus scrofa GN=SF3B1 PE=1 SV=2	Splicing factor 3b subunit 1	SF3B1	SF3B1	Splicing factor 3b subunit 1
728	9670	tr|F1SNJ2|F1SNJ2_PIG	F1SNJ2	PTN	200	15	2	2	Carbamidomethylation	39.352	48.521	0	100	0	0	97.9351	0	0	99.7407	0	0	78.2208	0	0	19.676	68.4952	46.6603	58.6517	77.1016	0	64.00:-:64.00:-:-:64.00:-:-:64.00:-:-:-:-:64.00:64.00:64.00:64.00:64.00:-:64.00:64.00	19122	Uncharacterized protein OS=Sus scrofa PE=4 SV=2	obsolete	PTN	PTN	obsolete	Uniprot listed as obsolete, NIH Smart Blast associates with Pleiotrophin precursor
545	8786	tr|F1SPF9|F1SPF9_PIG	F1SPF9	COPG1	200	20	5	5	Carbamidomethylation; Deamidation (NQ)	0	53.2027	0	0	0	0	83.6473	0	0	100	0	0	5.21443	0	0	0	0	0	10.4289	96.921	51.7808	64.00:-:-:-:-:64.00:-:-:64.00:-:-:-:-:-:-:-:64.00:64.00:64.00:-:64.00	52256	Uncharacterized protein OS=Sus scrofa PE=1 SV=2	Coatomer subunit gamma	COPG1	COPG1	Coatomer subunit gamma
488	8695	tr|F1SPG9|F1SPG9_PIG	F1SPG9	ESYT1	107.17	10	6	6		0	97.9541	65.615	0	0	32.8075	0	0	80.7665	0	0	100	0	0	90.9159	84.1699	0	95.3599	0	93.3407	0	64.00:64.00:-:-:64.00:-:-:64.00:-:-:64.00:-:64.00:64.00:-:64.00:-:64.00:-:-:-	122491	Extended synaptotagmin 1 OS=Sus scrofa GN=ESYT1 PE=1 SV=1	Extended synaptotagmin 1	ESYT1	ESYT1	Extended synaptotagmin 1
976	9362	tr|F1SPI1|F1SPI1_PIG	F1SPI1	TMEM43	72	10	2	2		0	0	0	0	0	0	0	0	0	0	0	0	0	0	0	34.2616	0	0	68.5233	100	0	-:-:-:-:-:-:-:-:-:-:-:-:-:64.00:-:-:64.00:64.00:-:-:-	44905	Transmembrane protein 43 OS=Sus scrofa GN=TMEM43 PE=1 SV=2	Transmembrane protein 43	TMEM43	TMEM43	Transmembrane protein 43
441	8587	tr|F1SPP8|F1SPP8_PIG	F1SPP8	CKAP4	200	16	6	6	Deamidation (NQ)	17.7206	0	0	41.6055	0	0	35.4413	0	0	36.7797	0	0	36.6313	51.5785	55.5796	75.1278	53.3942	0	73.63	100	82.2062	-:-:64.00:-:-:64.00:-:-:64.00:-:-:64.00:64.00:64.00:64.00:-:64.00:64.00:64.00:64.00:64.00	61459	Cytoskeleton associated protein 4 OS=Sus scrofa GN=CKAP4 PE=1 SV=2	Cytoskeleton associated protein 4	CKAP4	CKAP4	Cytoskeleton associated protein 4
299	8821	tr|F1SPX3|F1SPX3_PIG	F1SPX3	NTS	200	45	10	10	Deamidation (NQ); Pyro-glu from Q	32.3879	34.3578	0	0	45.5572	48.2815	52.5642	69.0659	81.5335	0	71.1875	100	0	29.2721	0	8.86124	30.0323	0	0	17.7225	40.1066	0.36:0:0:1.00:2.40:1.45:6.00:4.16:0:4.79:20.48:0.25:0:0.06:0.27:0:0:0.06:0.31:0.45:0	19857	Neurotensin OS=Sus scrofa GN=NTS PE=4 SV=1	Neurotensin	NTS	NTS	Neurotensin
47	8390	tr|F1SQ09|F1SQ09_PIG	F1SQ09	LUM	200	57	25	25	Oxidation (M); Deamidation (NQ); Phosphorylation (STY)	26.8173	44.4833	0	80.5705	22.4398	40.9139	78.1458	0	68.2949	86.8617	9.30001	61.0945	71.217	34.708	18.6	0	50.7735	52.7419	85.0953	96.8844	100	5.97:0:64.00:1.00:9.82:64.00:0:14.08:64.00:0.20:8.65:2.58:0.70:0:11.10:19.37:64.00:64.00:64.00:1.84:64.00	38779	Lumican OS=Sus scrofa GN=LUM PE=1 SV=1	Lumican	LUM	LUM	Lumican
457	9367	tr|F1SQ51|F1SQ51_PIG	F1SQ51	TP23	200	12	5	5	Phosphorylation (STY)	8.80834	17.6167	0	45.679	0	0	0	0	0	0	0	0	0	100	0	96.1162	0	0	0	0	0	64.00:-:64.00:-:-:-:-:-:-:-:-:64.00:-:64.00:-:-:-:-:-:64.00:-	34019	Uncharacterized protein OS=Sus scrofa PE=4 SV=2	Basic proline-rich protein	TP23	TP23	Basic proline-rich protein
946	9453	tr|F1SQN1|F1SQN1_PIG	F1SQN1	CCT4	16.1	4	2	2		0	6.74937	25.1298	0	0	0	0	0	0	0	0	0	13.4987	0	0	70.7517	0	47.5203	51.932	100	0	64.00:64.00:-:-:-:-:-:-:-:-:-:-:-:64.00:-:64.00:64.00:64.00:-:-:64.00	58057	T-complex protein 1 subunit delta OS=Sus scrofa GN=CCT4 PE=1 SV=1	T-complex protein 1 subunit delta	CCT4	CCT4	T-complex protein 1 subunit delta
577	9043	tr|F1SQW8|F1SQW8_PIG	F1SQW8	ARHGDIB	200	29	6	6	Oxidation (M)	0	19.7857	0	0	0	0	0	0	0	0	61.3511	0	39.5714	100	41.1117	76.3782	0	0	0	92.6352	0	64.00:-:-:-:-:-:-:-:-:64.00:-:64.00:64.00:64.00:-:-:-:64.00:-:-:64.00	22849	Rho GDP dissociation inhibitor (GDI) beta OS=Sus scrofa GN=ARHGDIB PE=1 SV=2	Rho GDP dissociation inhibitor (GDI) beta	ARHGDIB	ARHGDIB	Rho GDP dissociation inhibitor (GDI) beta
121	8701	tr|F1SRC8|F1SRC8_PIG	F1SRC8	CLEC3B	200	36	10	4	Carbamidomethylation; Deamidation (NQ)	0	0	11.5921	95.1708	25.1957	23.1841	92.2779	0	0	100	0	0	76.7985	65.9634	0	0	0	89.6577	89.8207	0	92.0889	0:0.19:64.00:1.00:1.62:64.00:0:0:64.00:0:0:32.86:0:0:0:64.00:64.00:0:64.00:0:64.00	22190	C-type lectin domain family 3 member B OS=Sus scrofa GN=CLEC3B PE=1 SV=1	C-type lectin domain family 3 member B	CLEC3B	CLEC3B	C-type lectin domain family 3 member B
82	8335	tr|F1SS24|F1SS24_PIG	F1SS24	FN1	200	29	37	37	Deamidation (NQ)	0	54.1311	0	93.5631	49.7594	91.2921	78.9949	22.0145	0	67.8764	0	0	84.5344	44.0291	0	0	62.891	55.8002	85.7836	100	95.1023	1.19:0:21.27:1.00:41.37:7.22:0.12:0:3.74:0:0:0.58:0:0:2.43:2.10:21.57:19.75:13.22:0:12.65	272272	Fibronectin 1 OS=Sus scrofa GN=FN1 PE=1 SV=1	Fibronectin 1	FN1	FN1	Fibronectin 1
258	8519	tr|F1SS26|F1SS26_PIG	F1SS26	THBS1	200	11	11	10	Deamidation (NQ); Pyro-glu from Q	7.7281	0	0	59.5283	0	2.20185	50.7905	0	0	59.2683	0	0	1.10093	15.5425	4.82064	55.4402	0	16.0969	59.7987	35.5935	100	-:-:64.00:-:64.00:64.00:-:-:64.00:-:-:64.00:64.00:64.00:-:64.00:64.00:64.00:64.00:64.00:64.00	129546	Thrombospondin 1 OS=Sus scrofa GN=THBS1 PE=1 SV=2	Thrombospondin 1	THBS1	THBS1	Thrombospondin 1
120	8345	tr|F1SSA6|F1SSA6_PIG	F1SSA6	MYH10	200	20	32	19	Deamidation (NQ); Phosphorylation (STY)	80.6672	34.7639	59.61	63.0526	49.7243	12.2198	0	0	0	0	0	100	24.4397	81.2611	0	71.8176	77.9104	33.4063	29.5064	69.0367	44.9787	0.31:1.21:2.06:1.00:0.15:0:0:0:0:0:8.52:7.33:0:4.71:6.14:0.45:0.39:1.78:0.34:10.03:0.18	216148	myosin-10 OS=Sus scrofa GN=MYH10 PE=1 SV=2	myosin-10	MYH10	MYH10	myosin-10
325	8802	tr|F1SSH8|F1SSH8_PIG	F1SSH8	OGDH	200	9	5	5		0	92.4831	0	100	0	9.13571	55.6024	0	0	46.4094	0	0	31.4645	0	0	18.2714	0	36.0726	48.2142	0	44.7419	64.00:-:64.00:-:64.00:64.00:-:-:64.00:-:-:-:-:64.00:-:64.00:64.00:-:64.00:-:64.00	115527	Oxoglutarate dehydrogenase OS=Sus scrofa GN=OGDH PE=1 SV=2	Oxoglutarate dehydrogenase	OGDH	OGDH	Oxoglutarate dehydrogenase
94	8773	tr|F1STC5|F1STC5_PIG	F1STC5	IGKC	200	91	11	11	Carbamidomethylation; Deamidation (NQ)	69.3656	83.1181	71.019	89.5414	59.7848	68.6441	83.9302	26.0293	67.05	93.8474	52.0587	74.4089	84.3554	76.3019	67.7726	61.3049	100	69.3386	80.4622	86.1495	73.5941	3.45:1.22:4.95:1.00:3.27:3.51:0.13:0.38:7.45:0.41:0.69:2.35:1.58:1.17:10.08:2.38:5.17:2.33:1.06:2.21:4.20	12050	Immunoglobulin kappa constant (Fragment) OS=Sus scrofa GN=IGKC PE=1 SV=3	Immunoglobulin kappa constant (Fragment)	IGKC	IGKC	Immunoglobulin kappa constant (Fragment)
512	8967	tr|F1SU03|F1SU03_PIG	F1SU03	HSPG2	200	4	3	3		0	0	0	0	0	0	0	0	0	0	0	0	0	0	0	0	0	44.3305	22.1653	100	95.2722	-:-:-:-:-:-:-:-:-:-:-:-:-:-:-:64.00:64.00:64.00:64.00:-:-	195010	Heparan sulfate proteoglycan 2 OS=Sus scrofa PE=1 SV=2	Heparan sulfate proteoglycan 2	HSPG2	HSPG2	Heparan sulfate proteoglycan 2
697	9050	tr|F1SU06|F1SU06_PIG	F1SU06	HP1BP3	200	6	3	3		0	70.8976	0	0	0	0	0	0	0	0	0	0	0	24.6815	0	49.363	0	71.9196	61.8898	100	82.1897	64.00:-:-:-:-:-:-:-:-:-:-:64.00:-:64.00:-:64.00:64.00:64.00:64.00:-:-	61034	Heterochromatin protein 1 binding protein 3 OS=Sus scrofa GN=HP1BP3 PE=1 SV=1	Heterochromatin protein 1 binding protein 3	HP1BP3	HP1BP3	Heterochromatin protein 1 binding protein 3
92	8497	tr|F1SUE2|F1SUE2_PIG	F1SUE2	OMD	200	33	13	12	Carbamidomethylation; Deamidation (NQ); Pyro-glu from Q; Phosphorylation (STY)	0	0	72.9101	100	0	50.7874	81.9768	25.3937	0	90.7159	0	0	75.0874	61.995	56.6377	86.3356	0	0	72.494	70.9496	99.1221	-:64.00:64.00:-:64.00:64.00:64.00:-:64.00:-:-:64.00:64.00:64.00:-:-:64.00:64.00:64.00:-:64.00	49308	Osteomodulin OS=Sus scrofa GN=OMD PE=1 SV=1	Osteomodulin	OMD	OMD	Osteomodulin
158	8536	tr|F1SUE4|F1SUE4_PIG	F1SUE4	ASPN	200	35	14	13	Deamidation (NQ)	0	0	7.95768	43.5708	0	0	0	0	0	51.2501	0	0	1.76221	3.52442	0	7.49099	0	20.2221	75.2323	97.0583	100	-:64.00:64.00:-:-:-:-:-:64.00:-:-:64.00:-:64.00:-:64.00:64.00:64.00:64.00:-:64.00	42446	Asporin OS=Sus scrofa GN=ASPN PE=1 SV=1	Asporin	ASPN	ASPN	Asporin
547	8918	tr|F1SUF2|F1SUF2_PIG	F1SUF2	HK1	146.54	3	2	2		0	100	0	0	0	0	0	0	0	0	0	0	0	0	0	6.35265	0	12.7053	0	0	0	64.00:-:-:-:-:-:-:-:-:-:-:-:-:64.00:-:64.00:-:-:-:-:-	83569	Hexokinase 1 OS=Sus scrofa GN=HK1 PE=1 SV=2	Hexokinase 1	HK1	HK1	Hexokinase 1
250	8564	tr|F1SUM3|F1SUM3_PIG	F1SUM3	SERPINH1	200	64	12	12	Oxidation (M); Deamidation (NQ)	0	46.1628	36.6687	0	18.3343	0	0	0	0	66.7427	0	64.5466	0	0	0	0	0	39.9879	80.5135	100	90.0944	9.82:3.12:0:1.00:0:0:0:0:64.00:0:16.55:0:0:0:0:8.97:64.00:64.00:64.00:0:0	24408	Serpin H1 OS=Sus scrofa PE=1 SV=1	Serpin, obsolete	SERPINH1	SERPINH1	Serpin, obsolete
955	8946	tr|F1SUW3|F1SUW3_PIG	F1SUW3	EFHD2	69.16	15	3	2		0	0	0	66.2015	0	0	0	0	76.3294	27.6438	0	0	0	88.1532	0	13.8219	0	0	0	0	100	-:-:64.00:-:-:-:-:64.00:64.00:-:-:64.00:-:64.00:-:-:-:-:64.00:-:-	26642	EF-hand domain family member D2 OS=Sus scrofa GN=EFHD2 PE=1 SV=1	EF-hand domain family member D2	EFHD2	EFHD2	EF-hand domain family member D2
207	9025	tr|F1SV22|F1SV22_PIG	F1SV22	MACF1	37.34	1	4	3	Oxidation (M); Deamidation (NQ); HexNAcylation (N)	0	0	0	0	0	0	90.0155	0	0	22.3879	44.7757	89.5425	0	0	0	0	0	0	0	100	0	-:-:-:-:-:64.00:-:-:64.00:64.00:64.00:-:-:-:-:-:-:64.00:-:-:-	829774	Microtubule-actin crosslinking factor 1 OS=Sus scrofa GN=MACF1 PE=1 SV=2	Microtubule-actin crosslinking factor 1	MACF1	MACF1	Microtubule-actin crosslinking factor 1
735	9053	tr|F1SVB0|F1SVB0_PIG	F1SVB0	CAPG	200	12	4	4		9.16639	38.3678	30.7086	0	0	18.3328	0	0	0	0	0	0	0	48.1846	0	0	0	53.9339	75.4025	100	64.0317	64.00:64.00:-:-:64.00:-:-:-:-:-:-:64.00:-:-:-:64.00:64.00:64.00:64.00:64.00:-	38942	Capping actin protein gelsolin like OS=Sus scrofa GN=CAPG PE=1 SV=1	Capping actin protein gelsolin like	CAPG	CAPG	Capping actin protein gelsolin like
376	8754	tr|F2Z4Z1|F2Z4Z1_PIG	F2Z4Z1	YWHAG	200	25	6	2	Carbamidomethylation; Oxidation (M)	64.0025	96.0979	96.3643	0	0	91.3418	0	0	0	32.0012	0	0	85.2313	0	0	79.2754	0	0	78.6902	90.3363	100	64.00:64.00:-:-:64.00:-:-:-:64.00:-:-:-:-:64.00:-:-:64.00:64.00:64.00:64.00:64.00	28303	Tyrosine 3-monooxygenase tryptophan 5-monooxygenase activation protein gamma OS=Sus scrofa GN=YWHAG PE=1 SV=1	Tyrosine 3-monooxygenase tryptophan 5-monooxygenase activation protein gamma	YWHAG	YWHAG	Tyrosine 3-monooxygenase tryptophan 5-monooxygenase activation protein gamma
663	8719	tr|F2Z543|F2Z543_PIG	F2Z543	PHB	200	32	6	6		0	100	0	61.9113	0	0	0	0	0	35.9422	0	0	27.327	0	0	20.371	10.1855	38.2956	24.3275	68.4248	23.0208	64.00:-:64.00:-:-:-:-:-:64.00:-:-:-:-:64.00:64.00:64.00:64.00:64.00:64.00:-:64.00	30096	prohibitin OS=Sus scrofa GN=PHB PE=1 SV=2	prohibitin	PHB	PHB	prohibitin
224	8580	tr|F2Z558|F2Z558_PIG	F2Z558	YWHAZ	200	40	8	5	Oxidation (M); Deamidation (NQ)	49.2717	100	93.6012	81.1813	17.5851	78.134	60.029	0	79.8723	35.9122	35.1702	0	86.5945	51.4525	0	60.7862	40.9779	70.3074	66.2328	91.0777	44.6188	59.53:31.34:22.18:1.00:43.68:7.44:0:6.17:2.52:1.60:0:5.01:0:9.85:3.06:20.27:18.49:21.31:1.88:6.39:33.91	28078	Tyrosine 3-monooxygenase tryptophan 5-monooxygenase activation protein zeta OS=Sus scrofa GN=YWHAZ PE=1 SV=2	Tyrosine 3-monooxygenase tryptophan 5-monooxygenase activation protein zeta	YWHAZ	YWHAZ	Tyrosine 3-monooxygenase tryptophan 5-monooxygenase activation protein zeta
1069	9268	tr|F2Z568|F2Z568_PIG	F2Z568	RPL38	200	36	3	3		0	61.857	0	0	0	0	0	0	0	0	0	0	0	0	0	0	0	57.3238	19.0612	100	38.1224	64.00:-:-:-:-:-:-:-:-:-:-:-:-:-:-:64.00:64.00:64.00:64.00:-:-	8218	Ribosomal protein L38 OS=Sus scrofa GN=RPL38 PE=1 SV=1	Ribosomal protein L38	RPL38	RPL38	Ribosomal protein L38
205	8816	tr|F2Z579|F2Z579_PIG	F2Z579	HIST1H2BN	200	41	7	2	Oxidation (M); Deamidation (NQ); Pyro-glu from Q	0	80.2914	0	0	10.6851	5.34253	0	0	0	0	0	69.2854	45.9825	0	48.7463	69.5386	0	84.2273	78.705	100	91.4088	64.00:0:0:1.00:1.30:0:0:0:0:0:22.92:0:16.77:64.00:0:64.00:64.00:64.00:64.00:0:13.52	13922	Histone H2B OS=Sus scrofa GN=HIST1H2BN PE=3 SV=1	Histone H2B	HIST1H2BN	HIST1H2BN	Histone H2B
194	8381	tr|F2Z5B1|F2Z5B1_PIG	F2Z5B1	SERPINB1	200	55	19	18	Oxidation (M); Deamidation (NQ)	75.209	0	0	58.7838	0	0	0	0	0	0	0	0	0	94.5056	0	75.4975	25.2417	50.4834	69.4415	100	92.437	-:-:64.00:-:-:-:-:-:-:-:-:64.00:-:64.00:64.00:64.00:64.00:64.00:64.00:64.00:-	42571	Leukocyte elastase inhibitor OS=Sus scrofa GN=SERPINB1 PE=1 SV=1	Leukocyte elastase inhibitor	SERPINB1	SERPINB1	Leukocyte elastase inhibitor
888	9735	tr|F2Z5B4|F2Z5B4_PIG	F2Z5B4	HNRNPA3	29.58	8	2	2		0	64.3384	0	0	0	0	0	0	0	0	41.1102	0	0	8.47491	0	16.9498	0	65.0483	51.8361	100	73.358	64.00:-:-:-:-:-:-:-:-:64.00:-:64.00:-:64.00:-:64.00:64.00:64.00:64.00:-:-	39652	Heterogeneous nuclear ribonucleoprotein A3 OS=Sus scrofa GN=HNRNPA3 PE=1 SV=1	Heterogeneous nuclear ribonucleoprotein A3	HNRNPA3	HNRNPA3	Heterogeneous nuclear ribonucleoprotein A3
231	8599	tr|F2Z5B6|F2Z5B6_PIG	F2Z5B6	TPM1	200	32	11	2	Deamidation (NQ)	47.4707	57.8766	44.3903	58.79	13.1748	52.7815	56.1466	0	49.1674	71.2377	0	40.8934	45.5019	38.0673	40.1607	39.1199	26.3496	47.1654	64.997	100	86.8961	55.23:11.47:58.84:1.00:64.00:45.74:0:7.14:64.00:0:3.82:8.93:12.11:11.95:3.13:31.88:64.00:64.00:64.00:30.55:19.72	32695	Tropomyosin alpha-1 chain OS=Sus scrofa GN=TPM1 PE=1 SV=1	Tropomyosin alpha-1 chain	TPM1	TPM1	Tropomyosin alpha-1 chain
95	8380	tr|F2Z5C1|F2Z5C1_PIG	F2Z5C1	ANXA5	200	74	20	19	Carbamidomethylation; Oxidation (M); Deamidation (NQ)	0	75.9478	79.1247	77.3215	26.8163	53.6326	61.181	0	70.0258	76.1941	0	0	69.8614	0	0	76.0467	57.3192	79.6759	81.3665	100	86.693	64.00:64.00:64.00:1.00:24.58:21.74:0:15.05:64.00:0:0:0:0:64.00:16.59:64.00:64.00:64.00:64.00:0:57.43	33157	Annexin OS=Sus scrofa GN=ANXA5 PE=1 SV=2	Annexin A5	ANXA5	ANXA5	Annexin A5
789	8999	tr|F2Z5C7|F2Z5C7_PIG	F2Z5C7	RPS3A	200	11	3	2		0	100	0	0	0	0	0	0	0	4.3147	0	0	0	0	0	8.6294	0	52.6068	37.429	76.4367	0	64.00:-:-:-:-:-:-:-:64.00:-:-:-:-:64.00:-:64.00:64.00:64.00:-:-:-	29945	40S ribosomal protein S3a OS=Sus scrofa GN=RPS3A PE=1 SV=1	40S ribosomal protein S3a	RPS3A	RPS3A	40S ribosomal protein S3a
64	8354	tr|F2Z5E2|F2Z5E2_PIG	F2Z5E2	SERPINC1	200	60	31	29	Carbamidomethylation; Oxidation (M); Deamidation (NQ)	21.4293	20.2	30.8299	75.249	3.8667	56.9783	75.2422	76.1869	100	61.4478	85.8071	88.3181	52.6517	36.5731	26.0979	1.93335	27.5371	4.11785	44.7463	57.3424	65.2951	2.45:3.54:64.00:1.00:58.29:64.00:64.00:64.00:39.52:64.00:64.00:7.19:4.09:0.94:4.21:1.37:20.89:15.05:24.08:3.87:22.26	52404	Serpin peptidase inhibitor clade C (antithrombin) member 1 OS=Sus scrofa GN=SERPINC1 PE=1 SV=1	Serpin peptidase inhibitor clade C (antithrombin) member 1	SERPINC1	SERPINC1	Serpin peptidase inhibitor clade C (antithrombin) member 1
1176	9586	tr|F2Z5E6|F2Z5E6_PIG	F2Z5E6	RPS5	200	24	2	2		0	0	0	0	0	0	0	0	0	0	0	0	0	0	0	0	0	0	50	100	0	-:-:-:-:-:-:-:-:-:-:-:-:-:-:-:-:64.00:64.00:-:-:-	22876	Ribosomal protein S5 OS=Sus scrofa GN=RPS5 PE=1 SV=1	Ribosomal protein S5	RPS5	RPS5	Ribosomal protein S5
764	9108	tr|F2Z5F5|F2Z5F5_PIG	F2Z5F5	RPS8	200	13	2	2		0	70.1098	0	99.8444	0	0	0	0	0	90.7671	0	0	61.1226	24.4299	0	48.8598	84.891	71.0939	91.5391	100	85.4366	64.00:-:64.00:-:-:-:-:-:64.00:-:-:64.00:-:64.00:64.00:64.00:64.00:64.00:64.00:-:64.00	24173	40S ribosomal protein S8 OS=Sus scrofa GN=RPS8 PE=1 SV=2	40S ribosomal protein S8	RPS8	RPS8	40S ribosomal protein S8
315	9192	tr|F2Z5G3|F2Z5G3_PIG	F2Z5G3	CALM2	200	31	5	5	Deamidation (NQ)	80.3613	93.0591	87.0592	86.0693	75.9112	56.4247	0	71.2566	66.4753	78.9887	28.2124	0	86.8786	88.4843	82.4486	80.5291	66.3438	79.4805	87.4598	93.6082	100	5.93:2.19:2.64:1.00:0.22:0:0.57:0.09:1.39:0.02:0:3.62:2.05:1.79:0.31:2.01:5.56:3.55:7.04:2.07:3.35	16838	Calmodulin 2 OS=Sus scrofa GN=CALM2 PE=1 SV=1	Calmodulin 2	CALM2	CALM2	Calmodulin 2
860	48499	tr|F2Z5G5|F2Z5G5_PIG	F2Z5G5	ACTR1A	27.46	13	2	2		0	0	0	51.3706	14.829	63.9023	100	55.1833	57.7905	64.9314	38.0642	0	0	0	0	0	0	29.6581	0	57.4429	50.8796	0:0:6.46:1.00:29.93:64.00:9.07:2.76:16.08:2.36:0:0:0:0:0:3.07:0:5.24:3.50:0:0	42614	ARP1 actin-related protein 1 homolog A centractin alpha OS=Sus scrofa GN=ACTR1A PE=1 SV=1	ARP1 actin-related protein 1 homolog A centractin alpha	ACTR1A	ACTR1A	ARP1 actin-related protein 1 homolog A centractin alpha
965	8902	tr|F2Z5H6|F2Z5H6_PIG	F2Z5H6	ATP6V0D1	146.99	17	4	4		0	100	13.6127	0	0	0	0	0	0	33.0524	0	0	0	66.0967	0	87.6161	27.2254	66.889	0	0	0	64.00:64.00:-:-:-:-:-:-:64.00:-:-:64.00:-:64.00:64.00:64.00:-:-:-:-:-	40329	V-type proton ATPase subunit OS=Sus scrofa GN=ATP6V0D1 PE=1 SV=1	V-type proton ATPase subunit	ATP6V0D1	ATP6V0D1	V-type proton ATPase subunit
107	8867	tr|F2Z5L5|F2Z5L5_PIG	F2Z5L5	HIST1H2A	13.47	59	16	2	Oxidation (M); Deamidation (NQ)	0	0	0	0	0	0	0	0	0	0	0	0	0	0	50	0	100	0	0	0	0	-:-:-:-:-:-:-:-:-:-:-:-:64.00:-:64.00:-:-:-:-:-:-	13988	Histone H2A OS=Sus scrofa GN=LOC100625850 PE=1 SV=1	Histone H2A	LOC100625850	HIST1H2A	Histone H2A
470	9338	tr|F2Z5M3|F2Z5M3_PIG	F2Z5M3	EIF5A	200	23	3	3		39.1056	85.1443	59.1522	53.382	16.078	0	0	8.039	17.366	50.4169	0	0	74.8619	59.5626	0	54.5912	0	55.7468	65.5314	100	87.3866	64.00:10.99:10.05:1.00:0:0:0.56:0.27:9.62:0:0:15.89:0:13.81:0:18.85:40.68:64.00:53.81:5.79:48.61	16832	Eukaryotic translation initiation factor 5A OS=Sus scrofa GN=EIF5A PE=1 SV=1	Eukaryotic translation initiation factor 5A	EIF5A	EIF5A	Eukaryotic translation initiation factor 5A
265	8825	tr|F2Z5P1|F2Z5P1_PIG	F2Z5P1	HIST1H2A	200	54	6	4	Deamidation (NQ)	54.134	0	67.9523	0	51.3579	0	0	0	12.9642	0	0	0	0	48.7722	56.405	25.9283	59.8931	83.5655	67.0725	100	85.8405	0:2.43:0:1.00:0:0:0:0.02:0:0:0:0.71:1.49:0.13:1.85:18.74:5.48:25.95:7.85:1.57:0	13377	Histone H2A OS=Sus scrofa GN=LOC100512448 PE=1 SV=1	Histone H2A	LOC100512448	HIST1H2A	Histone H2A
956	9494	tr|F2Z5Q6|F2Z5Q6_PIG	F2Z5Q6	RPS6	200	7	2	2		0	0	58.3544	0	0	0	0	0	0	0	0	0	50.7671	25.3836	0	74.1079	0	71.9724	66.4029	100	69.6734	-:64.00:-:-:-:-:-:-:-:-:-:64.00:-:64.00:-:64.00:64.00:64.00:64.00:-:64.00	28421	40S ribosomal protein S6 OS=Sus scrofa GN=RPS6 PE=1 SV=2	40S ribosomal protein S6	RPS6	RPS6	40S ribosomal protein S6
771	9067	tr|F6Q5P0|F6Q5P0_PIG	F6Q5P0	RPS13	200	24	3	3		0	69.2524	0	0	0	0	0	0	0	0	0	0	0	53.1475	0	78.2605	0	78.0499	66.5258	100	26.5737	64.00:-:-:-:-:-:-:-:-:-:-:64.00:-:64.00:-:64.00:64.00:64.00:64.00:-:-	17479	40S ribosomal protein S13 OS=Sus scrofa GN=RPS13 PE=1 SV=2	40S ribosomal protein S13	RPS13	RPS13	40S ribosomal protein S13
1273	9876	tr|G3FNU5|G3FNU5_PIG	G3FNU5	ITGB	39.25	3	2	2		0	0	0	0	0	0	0	0	0	0	0	0	0	0	0	0	0	0	0	100	50	-:-:-:-:-:-:-:-:-:-:-:-:-:-:-:-:-:64.00:64.00:-:-	88340	Integrin beta OS=Sus scrofa PE=2 SV=1	Integrin beta	ITGB	ITGB	Integrin beta
791	9113	tr|G5CXC8|G5CXC8_PIG	G5CXC8	DMP1	200	7	3	3	Phosphorylation (STY)	0	0	0	0	0	0	4.7575	0	0	9.51499	0	0	0	0	0	0	0	0	56.2628	42.1586	100	-:-:-:-:-:64.00:-:-:64.00:-:-:-:-:-:-:-:64.00:64.00:64.00:-:-	45679	Dentin matrix protein 1 (Fragment) OS=Sus scrofa GN=DMP1 PE=4 SV=1	Dentin matrix protein 1 (Fragment)	DMP1	DMP1	Dentin matrix protein 1 (Fragment)
108	8357	tr|G9F6X8|G9F6X8_PIG	G9F6X8	P4HB	200	57	23	23	Deamidation (NQ); Pyro-glu from Q	22.6774	76.864	45.3548	73.7069	63.7312	66.3484	75.1484	91.1912	97.6227	74.0442	91.923	100	73.518	78.235	0	0	46.3027	65.0555	79.5597	89.0124	85.8574	4.85:0.06:3.13:1.00:2.73:3.76:35.51:21.71:3.81:26.36:34.27:5.94:0:0:0.09:1.60:12.17:13.56:8.61:0.02:3.53	56399	Protein disulfide-isomerase OS=Sus scrofa PE=2 SV=1	Protein disulfide-isomerase	P4HB	P4HB	Protein disulfide-isomerase
464	8696	tr|G9F6X9|G9F6X9_PIG	G9F6X9	DPYSL2	200	12	5	5	Deamidation (NQ)	0	68.1536	0	0	0	0	0	0	0	0	0	0	0	17.7285	0	35.457	0	0	69.2184	100	73.619	64.00:-:-:-:-:-:-:-:-:-:-:64.00:-:64.00:-:-:64.00:64.00:64.00:-:-	62323	Dihydropyrimidinase-like 2 OS=Sus scrofa PE=2 SV=1	Dihydropyrimidinase-like 2	DPYSL2	DPYSL2	Dihydropyrimidinase-like 2
857	9007	tr|I3L555|I3L555_PIG	I3L555	ACPT	200	16	4	4		0	83.6932	48.2615	84.8848	23.7101	0	77.4521	47.4202	75.1502	83.3132	55.5297	73.1051	73.8321	0	0	49.8536	73.8179	84.9583	86.1387	89.9053	100	64.00:5.97:64.00:1.00:0:64.00:8.42:28.15:64.00:11.99:27.04:0:0:11.81:64.00:64.00:64.00:64.00:64.00:0:64.00	40830	Acid phosphatase testicular OS=Sus scrofa GN=ACPT PE=3 SV=1	Acid phosphatase testicular	ACPT	ACPT	Acid phosphatase testicular
815	9391	tr|I3L5B2|I3L5B2_PIG	I3L5B2	RPS7	200	17	2	2		0	53.0383	85.5095	83.355	55.3095	0	37.3573	0	0	54.2898	18.6787	0	65.9123	0	67.6277	78.5789	37.5901	90.7396	84.7311	93.4765	100	0.71:8.39:9.38:1.00:0:0.18:0:0:0.90:0.03:0:0:2.83:7.87:0.20:28.29:18.96:12.91:21.77:0:2.42	22127	Ribosomal protein S7 OS=Sus scrofa GN=RPS7 PE=1 SV=1	Ribosomal protein S7	RPS7	RPS7	Ribosomal protein S7
153	8543	tr|I3L5C4|I3L5C4_PIG	I3L5C4	KRT74	200	21	13	3	Carbamidomethylation; Deamidation (NQ)	2.60047	58.1149	35.6538	86.318	46.143	0	82.1229	5.20094	0	77.8419	62.2549	80.4386	64.8544	21.6587	56.6804	49.037	37.5867	75.2918	7.80101	31.2266	100	1.76:0.34:9.27:1.00:0:7.18:0.08:0:6.52:1.69:2.24:0.20:1.85:1.27:0.55:7.67:0.15:0.20:11.65:0.09:2.97	57813	Keratin 74 type II OS=Sus scrofa GN=KRT74 PE=3 SV=1	Keratin 74 type II	KRT74	KRT74	Keratin 74 type II
133	8375	tr|I3L5D5|I3L5D5_PIG	I3L5D5	AHNAK	200	21	20	20		41.8277	71.8036	58.9426	83.0365	20.4749	0	82.2991	0	66.9247	100	0	0	68.3618	53.2734	45.9313	64.3262	40.9498	65.231	55.3486	92.8111	94.5307	64.00:19.57:64.00:1.00:0:64.00:0:15.98:64.00:0:0:16.52:9.56:53.92:5.76:64.00:34.44:64.00:64.00:8.47:64.00	135902	neuroblast differentiation-associated protein OS=Sus scrofa GN=AHNAK PE=1 SV=1	neuroblast differentiation-associated protein	AHNAK	AHNAK	neuroblast differentiation-associated protein
745	9798	tr|I3L5L1|I3L5L1_PIG	I3L5L1	RAP1B	200	12	2	2	Deamidation (NQ)	0	93.0716	0	0	0	0	0	0	85.5285	30.6603	0	0	0	0	0	61.3206	0	62.654	68.4902	100	99.7235	64.00:-:-:-:-:-:-:64.00:64.00:-:-:-:-:64.00:-:64.00:64.00:64.00:64.00:-:-	20825	RAP1B, member of RAS oncogene family OS=Sus scrofa GN=RAP1B PE=1 SV=1	RAP1B, member of RAS oncogene family	RAP1B	RAP1B	RAP1B, member of RAS oncogene family
794	9583	tr|I3L5R6|I3L5R6_PIG	I3L5R6	S100B	200	40	2	2		4.36001	54.8977	100	70.2451	0	0	0	0	0	11.5704	0	0	90.7089	22.8747	16.1887	8.25446	2.18	28.8693	32.414	91.8245	72.1372	64.00:64.00:64.00:-:-:-:-:-:64.00:-:-:64.00:64.00:64.00:64.00:64.00:64.00:64.00:64.00:64.00:64.00	10627	S100 calcium binding protein B OS=Sus scrofa GN=S100B PE=1 SV=1	S100 calcium binding protein B	S100B	S100B	S100 calcium binding protein B
692	9296	tr|I3L5Y0|I3L5Y0_PIG	I3L5Y0	P4HA2	40.65	8	2	2		0	0	0	77.5659	0	0	66.9892	0	19.3659	82.3748	8.72596	0	17.4519	0	0	0	0	0	70.3946	87.5275	100	-:-:64.00:-:-:64.00:-:64.00:64.00:64.00:-:-:-:-:-:-:64.00:64.00:64.00:-:64.00	59504	Prolyl 4-hydroxylase subunit alpha 2 OS=Sus scrofa GN=P4HA2 PE=4 SV=1	Prolyl 4-hydroxylase subunit alpha 2	P4HA2	P4HA2	Prolyl 4-hydroxylase subunit alpha 2
455	9124	tr|I3L651|I3L651_PIG	I3L651	FGB	200	8	4	3	Phosphorylation (STY)	11.2886	73.1578	0	0	0	0	0	0	71.1224	0	0	0	22.5771	55.8773	0	38.0585	0	47.8056	43.7329	95.8927	100	64.00:-:-:-:-:-:-:64.00:-:-:-:64.00:-:64.00:-:64.00:64.00:64.00:64.00:64.00:64.00	56402	Fibrinogen beta chain OS=Sus scrofa PE=4 SV=1	Fibrinogen beta chain	FGB	FGB	Fibrinogen beta chain
1244	9540	tr|I3L6K3|I3L6K3_PIG	I3L6K3	PTX	15.97	23	2	2	Carbamidomethylation; Deamidation (NQ); HexNAcylation (N)	0	0	0	100	0	0	0	0	0	85.9386	0	0	0	0	0	0	0	0	42.9693	0	0	-:-:64.00:-:-:-:-:-:64.00:-:-:-:-:-:-:-:64.00:-:-:-:-	25178	Pentaxin OS=Sus scrofa GN=CRP PE=1 SV=1	Pentaxin	PTX	PTX	Pentaxin
854	9264	tr|I3L6Q5|I3L6Q5_PIG	I3L6Q5	HIST1H1B	51.54	11	2	2		0	0	0	0	0	0	0	0	0	0	0	14.8114	0	0	0	7.40569	0	70.8096	39.799	100	53.7505	-:-:-:-:-:-:-:-:-:-:64.00:-:-:64.00:-:64.00:64.00:64.00:64.00:-:-	20343	Histone cluster 1 H1 family member b OS=Sus scrofa GN=HIST1H1B PE=1 SV=1	Histone cluster 1 H1 family member b	HIST1H1B	HIST1H1B	Histone cluster 1 H1 family member b
940	9437	tr|I3L7S4|I3L7S4_PIG	I3L7S4	CALD1	200	5	2	2		48.5102	92.7298	39.2342	0	0	0	0	0	0	0	0	0	0	16.1445	59.6666	32.2891	0	86.1568	64.1585	100	79.5332	64.00:64.00:-:-:-:-:-:-:-:-:-:64.00:64.00:64.00:-:64.00:64.00:64.00:64.00:64.00:-	59939	Caldesmon 1 OS=Sus scrofa GN=CALD1 PE=1 SV=1	Caldesmon 1	CALD1	CALD1	Caldesmon 1
809	8955	tr|I3L7T8|I3L7T8_PIG	I3L7T8	ATPsynD	200	52	5	5	Deamidation (NQ)	0	100	0	63.5858	0	0	0	0	0	57.7562	0	0	0	66.6571	0	0	28.8781	92.1992	63.3627	0	0	64.00:-:64.00:-:-:-:-:-:64.00:-:-:64.00:-:-:64.00:64.00:64.00:-:-:-:-	10738	Uncharacterized protein OS=Sus scrofa PE=1 SV=1	obsolete	ATPsynD	ATPsynD	ATP synthase subunit d, mitochondrial	Uniprot listed as obsolete, NIH Smart Blast associates with ATP synthase subunit d
827	9290	tr|I3L812|I3L812_PIG	I3L812	TPP1	128.42	6	2	2		0	0	0	100	0	0	32.4181	0	0	77.5904	0	0	0	0	0	86.6145	0	11.5774	0	23.1547	0	-:-:64.00:-:-:64.00:-:-:64.00:-:-:-:-:64.00:-:64.00:-:64.00:-:-:-	62100	Tripeptidyl peptidase 1 OS=Sus scrofa GN=TPP1 PE=1 SV=1	Tripeptidyl peptidase 1	TPP1	TPP1	Tripeptidyl peptidase 1
652	8809	tr|I3L816|I3L816_PIG	I3L816	HNRNPH1	200	16	5	3		0	90.6581	0	77.5811	0	0	21.5067	0	0	0	0	0	0	8.02778	0	4.01389	0	68.8472	49.8597	100	63.7067	64.00:-:64.00:-:-:64.00:-:-:-:-:-:64.00:-:64.00:-:64.00:64.00:64.00:64.00:-:-	46313	Heterogeneous nuclear ribonucleoprotein H1 OS=Sus scrofa GN=HNRNPH1 PE=1 SV=1	Heterogeneous nuclear ribonucleoprotein H1	HNRNPH1	HNRNPH1	Heterogeneous nuclear ribonucleoprotein H1
436	8601	tr|I3L8F7|I3L8F7_PIG	I3L8F7	NES	200	5	7	7		8.96308	50.6475	31.1769	44.5717	0	40.2464	31.8527	74.7053	0	2.21436	80.7825	44.1029	0	7.69009	33.9007	0.837158	60.3829	59.162	1.67432	83.5462	100	64.00:64.00:64.00:-:64.00:64.00:64.00:-:64.00:64.00:64.00:64.00:64.00:64.00:64.00:64.00:64.00:64.00:64.00:64.00:-	176427	nestin OS=Sus scrofa GN=NES PE=1 SV=1	nestin	NES	NES	nestin
418	8796	tr|I3LBK9|I3LBK9_PIG	I3LBK9	DNAJC3	200	14	5	5		0	0	0	99.7353	0	0	77.2112	0	0	95.8902	0	0	55.6119	0	0	27.806	65.6272	0	93.4286	100	0	-:-:64.00:-:-:64.00:-:-:64.00:-:-:-:-:64.00:64.00:-:64.00:64.00:-:-:64.00	57678	DnaJ heat shock protein family OS=Sus scrofa GN=DNAJC3 PE=1 SV=1	DnaJ heat shock protein family	DNAJC3	DNAJC3	DnaJ heat shock protein family
893	9374	tr|I3LCI0|I3LCI0_PIG	I3LCI0	CYC1	36.12	9	2	2		0	100	9.87483	19.7497	0	0	0	0	44.4993	0	0	0	0	0	0	65.2538	0	65.8975	0	61.4758	0	64.00:64.00:64.00:-:-:-:-:64.00:-:-:-:-:-:64.00:-:64.00:-:64.00:-:-:-	32768	cytochrome c1, heme protein, mitochondrial OS=Sus scrofa GN=LOC100525869 PE=1 SV=1	cytochrome c1, heme protein, mitochondrial	LOC100525869	CYC1	cytochrome c1, heme protein, mitochondrial
476	8947	tr|I3LCK1|I3LCK1_PIG	I3LCK1	LRRC15	200	13	5	5	Deamidation (NQ)	0	38.7107	0	0	0	0	0	0	0	0	0	0	0	0	0	0	0	0	77.4213	100	92.1453	64.00:-:-:-:-:-:-:-:-:-:-:-:-:-:-:-:64.00:64.00:64.00:-:-	64451	Leucine rich repeat containing 15 OS=Sus scrofa GN=LRRC15 PE=4 SV=1	Leucine rich repeat containing 15	LRRC15	LRRC15	Leucine rich repeat containing 15
763	8836	tr|I3LDF4|I3LDF4_PIG	I3LDF4	ADA	200	16	4	4		90.1572	0	39.9137	56.902	65.7195	82.2902	91.3757	90.4848	79.2571	54.3436	100	83.964	0	96.6883	18.3954	52.2583	36.7909	0	83.0803	0	0	0:0.16:0.53:1.00:4.65:3.26:3.54:0.51:0.54:3.96:0.76:4.53:0.08:0.52:0.20:0:3.80:0:0:4.57:0	40838	Adenosine deaminase OS=Sus scrofa GN=ADA PE=1 SV=1	Adenosine deaminase	ADA	ADA	Adenosine deaminase
362	8774	tr|I3LDK1|I3LDK1_PIG	I3LDK1	KRT86	89.01	11	5	2	Deamidation (NQ)	0	0	88.0695	88.2698	0	0	0	0	0	0	19.7147	0	50.3287	0	98.0391	4.26744	52.6232	8.53489	48.516	97.6087	100	-:64.00:64.00:-:-:-:-:-:-:64.00:-:-:64.00:64.00:64.00:64.00:64.00:64.00:64.00:-:64.00	54380	keratin type II cuticular Hb6 OS=Sus scrofa PE=1 SV=1	keratin type II cuticular Hb6	KRT86	KRT86	keratin type II cuticular Hb6
89	8516	tr|I3LDM6|I3LDM6_PIG	I3LDM6	KRT3	52.98	19	18	4	Carbamidomethylation; Deamidation (NQ); Phosphorylation (STY)	0	0	0	100	0	0	68.3534	0	0	86.5313	0	0	57.0526	0	0	28.0724	14.0362	0	65.1193	0	71.8639	-:-:64.00:-:-:64.00:-:-:64.00:-:-:-:-:64.00:64.00:-:64.00:-:64.00:-:64.00	65138	Keratin 3 OS=Sus scrofa GN=KRT3 PE=1 SV=1	Keratin 3	KRT3	KRT3	Keratin 3
22	8449	tr|I3LDS3|I3LDS3_PIG	I3LDS3	KRT10	200	23	19	7	Oxidation (M); Deamidation (NQ); Pyro-glu from Q	63.7694	86.7408	100	43.0488	66.5764	59.354	43.6019	52.8572	73.266	19.3098	58.7966	68.1498	54.044	74.5151	83.7633	70.3581	95.2372	55.7413	38.6196	57.3709	67.1442	3.10:5.21:0.19:1.00:1.22:0.20:0.40:0.38:0.05:0.40:0.32:1.45:2.92:1.36:5.66:0.68:0.26:0.27:0.48:1.05:0.44	57993	Keratin 10 OS=Sus scrofa GN=KRT10 PE=1 SV=1	Keratin 10	KRT10	KRT10	Keratin 10
200	8813	tr|I3LE39|I3LE39_PIG	I3LE39	HIST2B	200	41	7	2	Oxidation (M); Deamidation (NQ); Pyro-glu from Q	0	58.5667	0	0	0	0	0	0	21.0363	0	0	0	0	0	0	42.0725	0	62.3307	60.1489	100	76.8404	64.00:-:-:-:-:-:-:64.00:-:-:-:-:-:64.00:-:64.00:64.00:64.00:64.00:-:-	14010	Uncharacterized protein OS=Sus scrofa PE=3 SV=1	obsolete	HIST2B	HIST2B	Histone, uncertain	Uniprot listed as obsolete, NIH Smart Blast associates with Histone H2B
177	8517	tr|I3LEE6|I3LEE6_PIG	I3LEE6	PCOLCE	200	39	12	12	Carbamidomethylation; Deamidation (NQ)	0	7.95419	22.0339	100	46.6673	0	73.8046	0	0	80.33	0	0	56.0706	0	20.1936	0	54.6238	15.9084	91.2809	55.7255	75.3554	0.06:0.12:31.93:1.00:0:5.34:0:0:9.73:0:0:0:0.16:0:1.58:0.16:31.71:0.90:3.30:0:1.84	49991	Procollagen C-endopeptidase enhancer OS=Sus scrofa GN=PCOLCE PE=1 SV=1	Procollagen C-endopeptidase enhancer	PCOLCE	PCOLCE	Procollagen C-endopeptidase enhancer
1036	9565	tr|I3LER5|I3LER5_PIG	I3LER5	COX4I1	144.23	14	3	3		0	100	0	0	0	0	0	0	0	49.5805	0	0	0	0	0	22.0693	0	44.1386	0	0	0	64.00:-:-:-:-:-:-:-:64.00:-:-:-:-:64.00:-:64.00:-:-:-:-:-	19641	Cytochrome c oxidase subunit 4 isoform 1 mitochondrial OS=Sus scrofa GN=COX4I1 PE=1 SV=1	Cytochrome c oxidase subunit 4 isoform 1 mitochondrial	COX4I1	COX4I1	Cytochrome c oxidase subunit 4 isoform 1 mitochondrial
869	10350	tr|I3LF19|I3LF19_PIG	I3LF19	CLD	36.59	11	2	2		0	7.20551	0	87.331	16.2198	0	81.325	68.4679	89.6621	37.0077	85.042	100	0	19.2795	50.7214	3.60275	0	0	67.5848	0	0	0.52:0:46.00:1.00:0:32.68:18.00:15.58:3.16:31.01:32.29:1.05:6.84:0.52:0:0:27.31:0:0:0:0	13336	Uncharacterized protein OS=Sus scrofa PE=4 SV=1	obsolete	CLD	CLD	Chloride anion echanger	Uniprot listed as obsolete, NIH Smart Blast associates with cyclophilin-type peptidyl-prolyl cis-trans isomerase
774	8997	tr|I3LFL4|I3LFL4_PIG	I3LFL4	RPL18	200	20	3	3		0	70.4281	0	67.4153	0	23.5587	49.9182	0	47.1175	73.9451	0	0	0	0	0	53.6944	0	64.4001	65.1776	100	79.0468	64.00:-:64.00:-:64.00:64.00:-:64.00:64.00:-:-:-:-:64.00:-:64.00:64.00:64.00:64.00:-:-	19257	ribosomal protein L18 OS=Sus scrofa GN=LOC100738912 PE=4 SV=1	ribosomal protein L18	LOC100738912	RPL18	ribosomal protein L18
1320	10146	tr|I3LG67|I3LG67_PIG	I3LG67	MARCKS	24.31	28	2	2		36.0455	0	0	0	0	0	0	0	0	0	0	0	100	44.9105	12.7166	6.35829	0	0	92.8224	49.9261	70.5975	-:-:-:-:-:-:-:-:-:-:-:64.00:64.00:64.00:-:-:64.00:64.00:64.00:64.00:64.00	17739	Uncharacterized protein OS=Sus scrofa PE=1 SV=1	obsolete	MARCKS	MARCKS	Myristoylated alanine-rich C-kinase substrate	Uniprot lists as obsolete, NIH Smart Blast associates with myristoylated alanine rich protein kinase C substrate
266	8598	tr|I3LGC2|I3LGC2_PIG	I3LGC2	RRBP1	200	5	5	5		0	56.3845	0	0	0	0	0	0	0	19.7054	0	0	0	48.4387	0	39.4107	0	59.3127	52.3631	100	92.7062	64.00:-:-:-:-:-:-:-:64.00:-:-:64.00:-:64.00:-:64.00:64.00:64.00:64.00:-:-	161294	Uncharacterized protein OS=Sus scrofa PE=1 SV=1	Ribosome binding protein 1	RRBP1	RRBP1	Ribosome binding protein 1
463	8632	tr|I3LGN8|I3LGN8_PIG	I3LGN8	PKP1	200	16	5	5		0	86.5182	0	0	0	0	0	0	0	0	0	0	0	0	35.5072	71.0143	0	90.9332	0	100	0	64.00:-:-:-:-:-:-:-:-:-:-:-:64.00:64.00:-:64.00:-:64.00:-:-:-	51575	plakophilin 1 OS=Sus scrofa GN=PKP1 PE=1 SV=1	plakophilin 1	PKP1	PKP1	plakophilin 1
504	9292	tr|I3LH49|I3LH49_PIG	I3LH49	QPCT	200	10	3	2		72.8653	78.0257	82.3079	60.2088	71.5972	0	0	100	0	55.1209	65.9872	0	0	74.9098	77.3681	73.0535	80.8992	25.9214	51.8428	0	0	2.55:3.83:0.12:1.00:0:0:64.00:0:0.06:0.25:0:1.54:2.61:1.37:4.44:0.02:0.05:0:0:1.55:0	35707	Glutaminyl-peptide cyclotransferase OS=Sus scrofa PE=4 SV=1	Glutaminyl-peptide cyclotransferase	QPCT	QPCT	Glutaminyl-peptide cyclotransferase
354	8492	tr|I3LHZ6|I3LHZ6_PIG	I3LHZ6	DHX9	77.48	15	13	8	Deamidation (NQ)	0	5.82019	0	0	0	50.5851	18.0928	0	0	0	0	0	0	0	0	28.5739	0	44.0422	11.6404	100	57.5559	64.00:-:-:-:64.00:64.00:-:-:-:-:-:-:-:64.00:-:64.00:64.00:64.00:64.00:-:-	140448	DExH-box helicase 9 OS=Sus scrofa GN=DHX9 PE=1 SV=1	DExH-box helicase 9	DHX9	DHX9	DExH-box helicase 9
724	8985	tr|I3LI24|I3LI24_PIG	I3LI24	GNB2L1	200	14	4	4		50.1875	68.8833	0	0	22.1996	0	0	0	0	0	0	0	0	44.3993	56.0002	61.6621	0	50.4938	77.5497	100	70.8633	21.80:0:0:1.00:0:0:0:0:0:0:0:4.08:10.18:16.38:0:9.54:64.00:64.00:13.58:8.71:0	35203	Receptor of activated protein C kinase 1 OS=Sus scrofa GN=GNB2L1 PE=4 SV=1	Receptor of activated protein C kinase 1	GNB2L1	GNB2L1	Receptor of activated protein C kinase 1
708	8776	tr|I3LI44|I3LI44_PIG	I3LI44	COTL1	200	27	4	4		0	63.3345	74.5078	0	29.6778	61.6056	43.2189	60.484	100	22.3184	81.0826	0	39.1684	86.743	0	54.4358	11.1592	25.6953	0	66.2403	82.5275	3.97:4.81:0:1.00:8.24:1.55:3.86:6.12:0.70:6.65:0:11.72:0:3.28:0.40:1.12:0:2.56:5.15:0:1.50	15438	Coactosin like F-actin binding protein 1 OS=Sus scrofa GN=COTL1 PE=1 SV=1	Coactosin like F-actin binding protein 1	COTL1	COTL1	Coactosin like F-actin binding protein 1
327	8645	tr|I3LIE3|I3LIE3_PIG	I3LIE3	MYH14	200	5	9	3		0	67.9575	0	0	0	0	0	29.7407	91.0052	79.5798	78.1821	100	0	0	0	59.4813	0	71.9751	0	0	0	64.00:-:-:-:-:-:64.00:64.00:64.00:64.00:64.00:-:-:64.00:-:64.00:-:-:-:-:-	186047	Myosin heavy chain 14 OS=Sus scrofa GN=MYH14 PE=1 SV=1	Myosin heavy chain 14	MYH14	MYH14	Myosin heavy chain 14
868	9532	tr|I3LII0|I3LII0_PIG	I3LII0	NDUFA6	25.32	24	2	2		0	100	0	0	0	0	0	0	0	0	0	0	0	0	0	0	0	50	0	0	0	64.00:-:-:-:-:-:-:-:-:-:-:-:-:-:-:64.00:-:-:-:-:-	15146	NADH dehydrogenase [ubiquinone] 1 alpha subcomplex subunit 6 OS=Sus scrofa GN=LOC100156627 PE=3 SV=1	NADH dehydrogenase [ubiquinone] 1 alpha subcomplex subunit 6	LOC100156627	NDUFA6	NADH dehydrogenase [ubiquinone] 1 alpha subcomplex subunit 6
287	8530	tr|I3LII3|I3LII3_PIG	I3LII3	EEF2	200	15	9	9		0	39.8073	11.1687	100	0	5.58433	40.2075	16.3794	63.7942	51.2174	24.031	18.3509	40.0167	13.9874	0	0	55.7871	36.3979	56.9392	78.9941	77.6241	64.00:64.00:64.00:-:64.00:64.00:64.00:64.00:64.00:64.00:64.00:64.00:-:-:64.00:64.00:64.00:64.00:64.00:-:64.00	95354	Eukaryotic translation elongation factor 2 OS=Sus scrofa GN=EEF2 PE=1 SV=1	Eukaryotic translation elongation factor 2	EEF2	EEF2	Eukaryotic translation elongation factor 2
335	8672	tr|I3LIL4|I3LIL4_PIG	I3LIL4	MYO1C	200	6	4	4		0	0	0	0	0	0	0	0	0	0	0	0	0	25.1413	0	85.7302	0	50.2826	68.4793	100	74.9073	-:-:-:-:-:-:-:-:-:-:-:64.00:-:64.00:-:64.00:64.00:64.00:64.00:-:-	122030	Myosin IC OS=Sus scrofa GN=MYO1C PE=1 SV=1	Myosin IC	MYO1C	MYO1C	Myosin IC
276	8674	tr|I3LIN8|I3LIN8_PIG	I3LIN8	H2AFY	200	26	10	5	Oxidation (M); Deamidation (NQ)	0	15.4531	0	0	0	0	0	0	0	0	0	0	0	30.9063	0	60.5128	0	89.2921	0	100	80.2566	64.00:-:-:-:-:-:-:-:-:-:-:64.00:-:64.00:-:64.00:-:64.00:64.00:-:-	39101	Core histone macro-H2A OS=Sus scrofa GN=H2AFY PE=1 SV=1	Core histone macro-H2A	H2AFY	H2AFY	Core histone macro-H2A
1376	9654	tr|I3LJA6|I3LJA6_PIG	I3LJA6	FGA	58.18	16	2	2		76.8057	26.0399	0	52.0798	0	0	0	0	0	68.4154	0	0	0	100	95.1938	80.2734	0	0	0	0	0	64.00:-:64.00:-:-:-:-:-:64.00:-:-:64.00:64.00:64.00:-:-:-:-:-:64.00:-	23446	Fibrinogen C Terminus OS=Sus scrofa PE=1 SV=1	Fibrinogen C Terminus	FGA	FGA	Fibrinogen C Terminus
161	8749	tr|I3LJX2|I3LJX2_PIG	I3LJX2	COL1A1	200	31	7	6	Deamidation (NQ)	40.521	52.5171	66.4313	71.7377	40.3881	38.6084	66.4754	29.1297	51.04	69.9597	28.0913	54.1928	66.922	51.0436	58.819	14.0456	58.1463	52.2933	77.0968	95.2868	100	2.11:4.30:8.54:1.00:1.70:5.76:0.41:0.55:8.74:0.26:0.80:1.93:3.83:0.15:3.42:3.24:22.86:28.14:38.29:1.26:6.91	20284	Uncharacterized protein OS=Sus scrofa PE=1 SV=1	obsolete	COL1A1	COL1A1	Collagen type I alpha 1	Uniprot listed as obsolete, NIH Smart Blast associates with collagen alpha-1(I) chain
906	9509	tr|I3LK33|I3LK33_PIG	I3LK33	RPL15	110.2	10	2	2		0	69.2887	0	0	0	0	0	0	6.6388	0	0	0	0	32.93	0	18.7766	0	52.5578	3.3194	100	28.3437	64.00:-:-:-:-:-:-:64.00:-:-:-:64.00:-:64.00:-:64.00:64.00:64.00:64.00:-:-	24146	Ribosomal protein L15 OS=Sus scrofa GN=LOC100620439 PE=1 SV=1	Ribosomal protein L15	LOC100620439	RPL15	Ribosomal protein L15
172	8571	tr|I3LK59|I3LK59_PIG	I3LK59	ENO1	200	30	8	5	Deamidation (NQ)	52.8767	99.3677	98.4496	0	32.6967	91.8169	0	0	92.3449	0	66.9992	83.2606	88.554	0	16.3484	83.4043	55.0902	68.877	79.7878	100	85.2631	64.00:64.00:0:1.00:64.00:0:0:24.67:0:9.03:14.21:0:0.28:52.59:5.16:21.79:56.60:64.00:26.70:5.93:64.00	38082	Enolase 1 OS=Sus scrofa GN=ENO1 PE=1 SV=1	Enolase 1	ENO1	ENO1	Enolase 1
1312	10107	tr|I3LK80|I3LK80_PIG	I3LK80	ELANE	42.96	14	2	2	Oxidation (M); Deamidation (NQ)	0	0	3.9169	0	0	0	77.8742	0	0	0	0	0	0	0	7.83381	100	0	0	0	0	0	-:64.00:-:-:-:64.00:-:-:-:-:-:-:64.00:64.00:-:-:-:-:-:-:-	28761	Elastase neutrophil expressed OS=Sus scrofa GN=ELANE PE=1 SV=1	Elastase neutrophil expressed	ELANE	ELANE	Elastase neutrophil expressed
492	8887	tr|I3LKF3|I3LKF3_PIG	I3LKF3	FSCN	200	12	5	4		37.5413	57.7437	58.719	49.1048	0	54.2066	0	0	11.9961	5.99807	51.9895	50.1271	34.3209	50.7294	27.3368	41.8154	59.0827	0	76.4212	100	86.6538	64.00:64.00:64.00:-:64.00:-:-:64.00:64.00:64.00:64.00:64.00:64.00:64.00:64.00:-:64.00:64.00:64.00:64.00:64.00	53234	Fascin OS=Sus scrofa GN=LOC100625519 PE=3 SV=1	Fascin	LOC100625519	FSCN	Fascin
602	9323	tr|I3LKR7|I3LKR7_PIG	I3LKR7	ACPP	200	13	3	3		69.8757	100	80.3422	0	79.9161	0	54.4258	0	0	21.4455	0	0	49.5394	42.8909	79.4779	0	48.3531	0	0	0	0	3.53:0.65:0:1.00:0:0.14:0:0:0.02:0:0:0.07:0.95:0:0.10:0:0:0:0:0.62:0.12	25235	Uncharacterized protein OS=Sus scrofa PE=3 SV=1	obsolete	ACPP	ACPP	Testicular acid phosphatase precursor	Uniprot listed as obsolete, NIH Smart Blast associates with prostatic acid phosphatase precursor
447	8718	tr|I3LLD8|I3LLD8_PIG	I3LLD8	HSPG2	200	23	7	7	Phosphorylation (STY)	0	15.0229	0	95.3318	0	0	41.323	0	0	78.0323	0	0	0	37.2059	17.3783	100	16.538	7.51146	57.6608	63.9862	77.9642	64.00:-:64.00:-:-:64.00:-:-:64.00:-:-:64.00:64.00:64.00:64.00:64.00:64.00:64.00:64.00:-:-	54529	heparan sulfate proteoglycan 2 OS=Sus scrofa GN=LOC100626701 PE=1 SV=1	heparan sulfate proteoglycan 2	LOC100626701	HSPG2	heparan sulfate proteoglycan 2
471	8857	tr|I3LLI8|I3LLI8_PIG	I3LLI8	14-3-3	200	21	6	5		0	92.7044	99.0575	35.9867	0	99.8638	0	0	95.0036	0	0	100	69.8393	0	0	79.0965	0	0	17.9933	88.391	65.2719	64.00:64.00:64.00:-:64.00:-:-:64.00:-:-:64.00:-:-:64.00:-:-:64.00:64.00:64.00:-:64.00	26672	Uncharacterized protein OS=Sus scrofa PE=1 SV=1	obsolete	14-3-3	14-3-3	14-3-3 protein	Uniprot listed as obsolete, NIH Smart Blast associates with 14-3-3 protein
76	8505	tr|I3LLY8|I3LLY8_PIG	I3LLY8	KRT79	13.28	19	18	2	Deamidation (NQ); Phosphorylation (STY)	0	0	0	0	0	0	0	0	0	0	0	0	0	0	0	0	0	0	0	100	0	-:-:-:-:-:-:-:-:-:-:-:-:-:-:-:-:-:64.00:-:-:-	57902	Keratin 79 OS=Sus scrofa GN=KRT79 PE=1 SV=1	Keratin 79	KRT79	KRT79	Keratin 79
202	8427	tr|I3LME4|I3LME4_PIG	I3LME4	LAMC2	200	19	14	14	Deamidation (NQ); Phosphorylation (STY)	0	60.2922	49.1927	24.7452	9.81778	38.1377	38.5689	41.6591	63.3125	100	59.0415	64.557	0	58.6724	19.6356	52.6105	24.9324	55.769	22.5955	64.419	27.4145	64.00:27.49:3.53:1.00:29.34:13.24:20.33:42.54:64.00:64.00:55.58:64.00:2.51:64.00:3.93:64.00:5.16:64.00:2.53:0:0	119190	laminin subunit gamma-2 OS=Sus scrofa GN=LOC100624264 PE=4 SV=1	laminin subunit gamma-2	LOC100624264	LAMC2	laminin subunit gamma-2
482	8717	tr|I3LMU6|I3LMU6_PIG	I3LMU6	RCN3	200	33	6	6	Deamidation (NQ)	0	0	0	72.3166	0	0	0	0	0	82.959	0	0	0	0	0	0	0	36.1583	94.0911	100	93.7046	-:-:64.00:-:-:-:-:-:64.00:-:-:-:-:-:-:64.00:64.00:64.00:64.00:-:-	37625	Reticulocalbin 3 OS=Sus scrofa GN=RCN3 PE=1 SV=1	Reticulocalbin 3	RCN3	RCN3	Reticulocalbin 3
242	8688	tr|I3LN42|I3LN42_PIG	I3LN42	GC	200	16	9	9	Deamidation (NQ)	33.7844	71.8813	67.7055	100	44.9085	52.7542	91.1629	0	0	99.2514	70.471	87.9748	96.2914	6.21383	0	46.81	55.6611	12.4277	69.7468	91.4547	74.2425	2.57:1.58:7.88:1.00:2.66:5.47:0:0:8.91:1.82:1.66:0.18:0:1.15:1.43:0.36:4.15:3.22:1.54:0.80:7.85	53469	GC vitamin D binding protein OS=Sus scrofa GN=GC PE=1 SV=1	GC vitamin D binding protein	GC	GC	GC vitamin D binding protein
103	8691	tr|I3LNT6|I3LNT6_PIG	I3LNT6	KRT77	200	14	9	3	Carbamidomethylation; Oxidation (M); Deamidation (NQ); Phosphorylation (STY)	32.2083	65.8395	100	0	56.2283	10.0555	42.0686	17.2804	0	35.224	37.0917	0	40.7092	43.5325	50.7501	47.262	70.0535	5.02774	0	0	0	1.32:4.36:0:1.00:0.25:0.45:0.17:0:0.39:0.28:0:0.50:0.77:0.72:1.70:0.14:0:0:0:0.43:0.49	62289	Keratin 77 OS=Sus scrofa GN=KRT77 PE=3 SV=1	Keratin 77	KRT77	KRT77	Keratin 77
603	8894	tr|I3LP78|I3LP78_PIG	I3LP78	RPL9	200	32	4	4	Deamidation (NQ)	0	73.6889	0	0	9.49031	69.2377	0	0	73.946	0	0	0	0	73.0632	67.1818	18.9806	0	75.0832	66.9422	100	80.7737	64.00:0:0:1.00:64.00:0:0:26.26:0:0:0:64.00:63.18:2.11:0:64.00:64.00:64.00:64.00:0:0	21863	Ribosomal protein L9 OS=Sus scrofa GN=RPL9 PE=1 SV=1	Ribosomal protein L9	RPL9	RPL9	Ribosomal protein L9
342	8681	tr|I3LPB5|I3LPB5_PIG	I3LPB5	CKB	200	52	8	6	Carbamidomethylation; Deamidation (NQ)	31.1906	91.5755	100	85.3245	16.7443	64.3135	90.7849	46.5942	0	84.0533	61.8974	0	81.7362	39.6042	0	8.37215	38.7722	18.7141	75.984	0	37.9109	50.05:57.16:34.76:1.00:25.58:46.50:4.82:0:37.84:7.47:0:3.04:0:0.68:3.04:1.50:37.72:0:1.48:2.75:33.07	20701	Uncharacterized protein OS=Sus scrofa PE=1 SV=1	Creatine kinase B-type	CKB	CKB	Creatine kinase B-type
1331	9632	tr|I3LPW0|I3LPW0_PIG	I3LPW0	NDUFB4	45.75	24	2	2		0	100	0	0	22.7916	29.828	76.9252	76.7266	0	9.18533	0	0	0	0	0	63.562	4.59266	69.0671	0	0	0	64.00:0:0:1.00:3.04:26.96:30.30:0:0.41:0:0:0:0:14.55:0.29:26.20:0:0:0:0:0	15096	NADH:ubiquinone oxidoreductase subunit B4 OS=Sus scrofa GN=NDUFB4 PE=1 SV=1	NADH:ubiquinone oxidoreductase subunit B4	NDUFB4	NDUFB4	NADH:ubiquinone oxidoreductase subunit B4
583	9246	tr|I3LQ17|I3LQ17_PIG	I3LQ17	PZP	36.07	2	3	2		50	0	0	0	0	0	0	0	0	0	0	0	0	0	0	0	0	0	0	100	0	-:-:-:-:-:-:-:-:-:-:-:-:-:-:-:-:-:64.00:-:64.00:-	167574	pregnancy zone protein OS=Sus scrofa PE=1 SV=1	pregnancy zone protein	PZP	PZP	pregnancy zone protein
115	8353	tr|I3LQ84|I3LQ84_PIG	I3LQ84	COL6A2	200	31	24	23	Carbamidomethylation; Deamidation (NQ)	0	0	0	0	0	0	62.4303	85.9767	100	0	88.9868	0	0	0	0	27.1219	0	54.2437	71.6053	91.2858	93.8741	-:-:-:-:-:64.00:64.00:64.00:-:64.00:-:-:-:64.00:-:64.00:64.00:64.00:64.00:-:-	106461	Collagen type VI alpha 2 chain OS=Sus scrofa GN=COL6A2 PE=1 SV=1	Collagen type VI alpha 2 chain	COL6A2	COL6A2	Collagen type VI alpha 2 chain
407	8588	tr|I3LQB3|I3LQB3_PIG	I3LQB3	ATP6V1H	200	23	8	7	Deamidation (NQ)	0	100	49.2138	19.9506	0	57.3131	0	0	88.8588	0	0	0	9.97528	0	0	68.7092	0	58.0317	0	0	0	64.00:64.00:64.00:-:64.00:-:-:64.00:-:-:-:-:-:64.00:-:64.00:-:-:-:-:64.00	54072	V-type proton ATPase subunit H OS=Sus scrofa GN=ATP6V1H PE=4 SV=1	V-type proton ATPase subunit H	ATP6V1H	ATP6V1H	V-type proton ATPase subunit H
801	9274	tr|I3LQH7|I3LQH7_PIG	I3LQH7	BLVRB	200	18	2	2	Deamidation (NQ)	13.7786	83.3386	83.3539	0	0	0	0	0	0	0	0	0	0	59.5202	6.88929	0	0	71.1942	46.1111	100	95.9484	64.00:64.00:-:-:-:-:-:-:-:-:-:64.00:64.00:-:-:64.00:64.00:64.00:64.00:64.00:-	22300	Biliverdin reductase B OS=Sus scrofa GN=BLVRB PE=1 SV=1	Biliverdin reductase B	BLVRB	BLVRB	Biliverdin reductase B
700	8822	tr|I3LQN4|I3LQN4_PIG	I3LQN4	PHB2	85.5	15	3	3		94.2887	100	0	0	17.7484	0	0	0	0	0	0	0	0	92.4095	35.4967	0	0	94.2748	43.1402	0	0	64.00:0:0:1.00:0:0:0:0:0:0:0:64.00:3.99:0:0:64.00:11.33:0:0:64.00:0	33388	Prohibitin 2 OS=Sus scrofa GN=PHB2 PE=1 SV=1	Prohibitin 2	PHB2	PHB2	Prohibitin 2
134	8532	tr|I3LQN8|I3LQN8_PIG	I3LQN8	KRT4	200	20	13	3	Carbamidomethylation; Deamidation (NQ)	0	27.286	0	0	0	54.5721	0	0	0	0	0	0	0	100	82.5926	85.635	0	0	0	0	0	64.00:-:-:-:64.00:-:-:-:-:-:-:64.00:64.00:64.00:-:-:-:-:-:-:-	57113	Keratin 4 OS=Sus scrofa GN=KRT4 PE=1 SV=1	Keratin 4	KRT4	KRT4	Keratin 4
453	8643	tr|I3LQS0|I3LQS0_PIG	I3LQS0	HNRNPK	200	23	6	6	Deamidation (NQ)	6.45058	78.623	13.2093	3.22529	0	51.6059	42.1164	0	58.0757	0	0	0	0	16.4557	0	45.6188	0	55.3531	52.1833	100	94.3508	64.00:64.00:64.00:-:64.00:64.00:-:64.00:-:-:-:64.00:-:64.00:-:64.00:64.00:64.00:64.00:64.00:-	49257	Heterogeneous nuclear ribonucleoprotein K OS=Sus scrofa GN=HNRNPK PE=1 SV=1	Heterogeneous nuclear ribonucleoprotein K	HNRNPK	HNRNPK	Heterogeneous nuclear ribonucleoprotein K
1034	9099	tr|I3LR17|I3LR17_PIG	I3LR17	CORO1A	200	10	4	4		17.594	0	0	87.7711	0	0	84.3951	0	0	88.3128	0	0	78.8252	92.2636	0	35.188	72.7262	63.1916	83.1601	87.5042	100	-:-:64.00:-:-:64.00:-:-:64.00:-:-:64.00:-:64.00:64.00:64.00:64.00:64.00:64.00:64.00:64.00	43411	Coronin 1A OS=Sus scrofa GN=CORO1A PE=1 SV=1	Coronin 1A	CORO1A	CORO1A	Coronin 1A
329	8686	tr|I3LRH2|I3LRH2_PIG	I3LRH2	NCL	200	11	6	6		75.2457	71.7177	0	0	0	0	0	0	0	0	0	0	29.2761	69.1545	0	99.208	0	58.5522	70.0848	100	96.8896	64.00:-:-:-:-:-:-:-:-:-:-:64.00:-:64.00:-:64.00:64.00:64.00:64.00:64.00:64.00	78228	nucleolin OS=Sus scrofa GN=LOC100519984 PE=1 SV=1	nucleolin	LOC100519984	NCL	nucleolin
872	9356	tr|I3LRH7|I3LRH7_PIG	I3LRH7	DSC3	26.21	6	3	2		0	0	0	0	0	0	0	0	0	0	0	0	0	0	0	0	50	100	0	0	0	-:-:-:-:-:-:-:-:-:-:-:-:-:-:64.00:64.00:-:-:-:-:-	83148	Desmocollin 3 OS=Sus scrofa GN=DSC3 PE=4 SV=1	Desmocollin 3	DSC3	DSC3	Desmocollin 3
119	8533	tr|I3LRJ4|I3LRJ4_PIG	I3LRJ4	PROC	200	23	10	9	Carbamidomethylation; Deamidation (NQ); Pyro-glu from Q	47.4949	47.1508	23.5754	93.5828	63.4552	49.8669	92.5532	0	75.5155	97.3256	0	72.5073	79.5667	47.2765	64.6941	0	64.9049	66.235	90.4074	90.9336	100	0.15:0.02:20.91:1.00:0.46:18.60:0:0.90:36.31:0:0.76:0.16:1.12:0:1.08:1.81:26.80:9.11:22.99:0.23:5.41	51957	Vitamin K-dependent protein C OS=Sus scrofa GN=PROC PE=3 SV=1	Vitamin K-dependent protein C	PROC	PROC	Vitamin K-dependent protein C
478	8544	tr|I3LRK1|I3LRK1_PIG	I3LRK1	MYH14	200	27	7	6		64.2893	94.5941	0	0	0	0	0	0	0	0	0	0	0	100	0	74.2238	32.1447	86.1944	0	0	68.498	64.00:-:-:-:-:-:-:-:-:-:-:64.00:-:64.00:64.00:64.00:-:-:64.00:64.00:-	44568	Uncharacterized protein OS=Sus scrofa PE=1 SV=1	obsolete	MYH14	MYH14	Myosin Heavy Chain 14	Uniprot listed as obsolete, NIH Smart Blast associates with myosin-14
1102	9510	tr|I3LRR4|I3LRR4_PIG	I3LRR4	NDUFV3	23.63	9	2	2		0	72.2735	0	0	0	0	0	0	88.7722	0	0	100	0	60.583	0	0	0	30.2915	0	0	0	64.00:-:-:-:-:-:-:64.00:-:-:64.00:64.00:-:-:-:64.00:-:-:-:-:-	42456	NADH:ubiquinone oxidoreductase subunit V3 OS=Sus scrofa PE=1 SV=1	NADH:ubiquinone oxidoreductase subunit V3	NDUFV3	NDUFV3	NADH:ubiquinone oxidoreductase subunit V3
494	8885	tr|I3LRZ8|I3LRZ8_PIG	I3LRZ8	CLEC11A	200	16	4	4		0	0	0	85.3745	0	0	68.2931	0	0	83.1141	0	0	64.5016	0	0	0	32.2508	0	73.631	79.511	100	-:-:64.00:-:-:64.00:-:-:64.00:-:-:-:-:-:64.00:-:64.00:64.00:64.00:-:64.00	36027	C-type lectin domain containing 11A OS=Sus scrofa GN=CLEC11A PE=1 SV=1	C-type lectin domain containing 11A	CLEC11A	CLEC11A	C-type lectin domain containing 11A
323	8637	tr|I3LS72|I3LS72_PIG	I3LS72	COL6A1	200	17	9	9	Pyro-glu from Q	14.6946	54.0416	61.6316	0	0	0	0	0	0	0	0	0	54.9143	42.4088	29.3892	56.7848	0	56.2369	75.7227	95.4921	100	64.00:64.00:-:-:-:-:-:-:-:-:-:64.00:64.00:64.00:-:64.00:64.00:64.00:64.00:64.00:64.00	45101	Uncharacterized protein OS=Sus scrofa PE=1 SV=1	Collagen alpha-1 (VI) chain	COL6A1	COL6A1	Collagen alpha-1 (VI) chain
804	9293	tr|I3LSD3|I3LSD3_PIG	I3LSD3	RPL13	200	7	2	2		0	61.1316	0	0	0	0	0	0	0	0	0	0	0	0	0	26.304	0	52.608	54.9752	100	64.2655	64.00:-:-:-:-:-:-:-:-:-:-:-:-:64.00:-:64.00:64.00:64.00:64.00:-:-	24306	60S ribosomal protein L13 OS=Sus scrofa GN=RPL13 PE=1 SV=1	60S ribosomal protein L13	RPL13	RPL13	60S ribosomal protein L13
305	8708	tr|I3LSF8|I3LSF8_PIG	I3LSF8	COL11A1	200	43	7	7	Deamidation (NQ); Pyro-glu from Q	0	58.4176	0	81.3706	0	37.0204	81.4433	0	0	90.7335	41.9224	60.343	18.5102	48.9126	0	0	53.5977	40.0348	83.2839	67.7122	100	64.00:-:64.00:-:64.00:64.00:-:-:64.00:64.00:64.00:64.00:-:-:64.00:64.00:64.00:64.00:64.00:-:64.00	23541	Uncharacterized protein OS=Sus scrofa PE=4 SV=1	obsolete	COL11A1	COL11A1	Collagen type XI alpha 1 chain	Uniprot listed as obsolete, NIH Smart Blast associates with collagen alpha-1(XI) chain
406	8537	tr|I3LSM7|I3LSM7_PIG	I3LSM7	IMMT	200	11	6	6		0	100	25.8808	12.9404	0	0	0	0	0	0	0	0	0	58.3805	0	37.9942	0	66.2919	0	69.4475	0	64.00:64.00:64.00:-:-:-:-:-:-:-:-:64.00:-:64.00:-:64.00:-:64.00:-:-:-	81412	MICOS complex subunit MIC60 OS=Sus scrofa GN=IMMT PE=1 SV=1	MICOS complex subunit MIC60	IMMT	IMMT	MICOS complex subunit MIC60
280	8886	tr|I3LSV6|I3LSV6_PIG	I3LSV6	COL2A1	200	3	4	3	Deamidation (NQ)	0	0	0	81.1985	0	0	72.708	0	0	23.4275	0	0	1.75752	24.1387	0	3.51503	71.9377	4.94661	74.2786	84.1016	100	-:-:64.00:-:-:64.00:-:-:64.00:-:-:64.00:-:64.00:64.00:64.00:64.00:64.00:64.00:-:64.00	130107	Collagen type II alpha 1 chain OS=Sus scrofa GN=COL2A1 PE=1 SV=1	Collagen type II alpha 1 chain	COL2A1	COL2A1	Collagen type II alpha 1 chain
942	9051	tr|I3LT81|I3LT81_PIG	I3LT81	RPL17	200	22	3	3		25.3884	78.3099	0	0	0	0	0	0	0	0	0	0	0	84.4921	0	56.2711	0	71.4844	12.6942	100	33.9059	64.00:-:-:-:-:-:-:-:-:-:-:64.00:-:64.00:-:64.00:64.00:64.00:64.00:64.00:-	21388	60S ribosomal protein L17 OS=Sus scrofa GN=RPL17 PE=1 SV=1	60S ribosomal protein L17	RPL17	RPL17	60S ribosomal protein L17
522	9092	tr|I3LTH8|I3LTH8_PIG	I3LTH8	NPM1	200	14	3	3	Oxidation (M)	0	64.6773	0	0	0	0	0	0	0	0	0	0	0	0	0	6.95463	0	41.6594	3.47732	100	21.7698	64.00:-:-:-:-:-:-:-:-:-:-:-:-:64.00:-:64.00:64.00:64.00:64.00:-:-	31354	Nucleophosmin OS=Sus scrofa GN=NPM1 PE=1 SV=1	Nucleophosmin	NPM1	NPM1	Nucleophosmin
409	8668	tr|I3LU27|I3LU27_PIG	I3LU27	ECM2	200	35	9	8		0	0	0	70.2208	0	0	16.8195	0	0	69.3422	0	0	33.639	0	0	0	0	0	58.2469	62.1761	100	-:-:64.00:-:-:64.00:-:-:64.00:-:-:-:-:-:-:-:64.00:64.00:64.00:-:64.00	30696	Uncharacterized protein OS=Sus scrofa PE=4 SV=1	Extracellular matrix protein 2	ECM2	ECM2	Extracellular matrix protein 2
268	8372	tr|I3LU54|I3LU54_PIG	I3LU54	DSG3	200	22	16	16	Carbamidomethylation; Deamidation (NQ)	60.7984	69.9612	24.1534	79.4669	68.3916	0	50.4835	55.3899	0	48.3067	0	79.2657	0	100	71.3448	89.854	0	99.8348	0	81.0995	95.8555	0.96:0.03:1.83:1.00:0:0.24:0.38:0:0.24:0:0.62:8.07:1.21:4.79:0:12.20:0:1.18:3.20:0.74:0	106812	Desmoglein 3 OS=Sus scrofa GN=DSG3 PE=4 SV=1	Desmoglein 3	DSG3	DSG3	Desmoglein 3
382	8919	tr|I3LUH8|I3LUH8_PIG	I3LUH8	COL17A1	200	18	6	6	Deamidation (NQ); Phosphorylation (STY)	30.6601	82.8442	70.1723	95.9291	51.5444	48.8979	88.974	38.785	66.4699	100	59.5273	64.0339	84.0429	21.5051	37.6142	15.7069	62.89	14.8835	56.1958	69.7236	7.44174	2.89:1.29:4.69:1.00:1.75:3.56:0.58:0.45:6.37:0.88:0.47:0.28:0.57:0.27:1.43:0.33:1.81:0.98:0.09:0.56:3.42	36107	Collagen type XVII alpha 1 chain OS=Sus scrofa PE=4 SV=1	Collagen type XVII alpha 1 chain	COL17A1	COL17A1	Collagen type XVII alpha 1 chain
575	8673	tr|I3LUI4|I3LUI4_PIG	I3LUI4	TNC	200	15	6	6		0	0	0	0	0	0	0	0	0	0	0	0	0	0	0	0	0	0	32.9901	65.9802	100	-:-:-:-:-:-:-:-:-:-:-:-:-:-:-:-:64.00:64.00:64.00:-:-	50386	Tenascin OS=Sus scrofa PE=1 SV=1	Tenascin	TNC	TNC	Tenascin
12	8334	tr|I3LUR7|I3LUR7_PIG	I3LUR7	COL6A3	200	42	101	98	Oxidation (M); Deamidation (NQ); Pyro-glu from Q	15.1202	0	0	0	0	0	0	0	0	3.08241	0	0	0	57.7142	0	1.5412	0	32.7306	55.8205	84.4625	100	-:-:-:-:-:-:-:-:64.00:-:-:64.00:-:64.00:-:64.00:64.00:64.00:64.00:64.00:-	342391	Collagen type VI alpha 3 chain OS=Sus scrofa GN=COL6A3 PE=1 SV=1	Collagen type VI alpha 3 chain	COL6A3	COL6A3	Collagen type VI alpha 3 chain
673	9058	tr|I3LUZ5|I3LUZ5_PIG	I3LUZ5	KAZALD1	200	16	4	4		33.238	0	0	73.0719	0	0	0	0	0	80.7986	0	0	28.0727	61.3348	4.62344	9.24689	0	31.169	63.4682	88.4847	100	-:-:64.00:-:-:-:-:-:64.00:-:-:64.00:64.00:64.00:-:64.00:64.00:64.00:64.00:64.00:64.00	34140	Kazal-type serine peptidase inhibitor domain 1 OS=Sus scrofa GN=KAZALD1 PE=4 SV=1	Kazal-type serine peptidase inhibitor domain 1	KAZALD1	KAZALD1	Kazal-type serine peptidase inhibitor domain 1
233	8412	tr|I3LV27|I3LV27_PIG	I3LV27	LAMA3	200	9	9	9	Carbamidomethylation; Deamidation (NQ)	0	26.3339	45.4302	0	8.48573	60.4954	59.6192	75.5538	90.1719	0	79.2254	100	0	40.2004	16.9715	39.3424	0	40.6088	0	0	0	3.76:13.23:0:1.00:64.00:57.05:64.00:64.00:0:64.00:64.00:12.10:1.98:13.61:0:19.09:0:0:0:0:0	184354	laminin subunit alpha-3-like OS=Sus scrofa GN=LOC106504078 PE=4 SV=1	laminin subunit alpha-3-like	LOC106504078	LAMA3	laminin subunit alpha-3-like
646	8726	tr|I3LVH8|I3LVH8_PIG	I3LVH8	DSC2	200	8	5	4	Deamidation (NQ)	90.2805	93.1188	0	88.3726	16.9902	33.9804	91.4849	70.9368	87.5326	85.2162	88.0588	94.4486	72.404	100	94.7931	77.9288	90.6111	97.0033	66.4446	87.4727	88.1384	64.00:0:64.00:1.00:8.21:64.00:64.00:64.00:64.00:64.00:64.00:64.00:64.00:64.00:64.00:64.00:64.00:64.00:64.00:64.00:64.00	88250	desmocollin 2 OS=Sus scrofa GN=LOC100623651 PE=1 SV=1	desmocollin 2	LOC100623651	DSC2	desmocollin 2
711	9208	tr|I3LVI8|I3LVI8_PIG	I3LVI8	RPL7A	200	9	3	3		3.40108	64.5812	0	0	1.70054	0	0	0	0	0	0	0	0	81.7202	16.759	38.6298	0	45.017	45.2226	100	82.0741	22.43:0:0:1.00:0:0:0:0:0:0:0:55.69:2.14:7.25:0:12.74:14.47:64.00:30.12:1.37:0	30101	60S ribosomal protein L7a OS=Sus scrofa GN=LOC100525692 PE=1 SV=1	60S ribosomal protein L7a	LOC100525692	RPL7A	60S ribosomal protein L7a
836	9107	tr|I3LVL5|I3LVL5_PIG	I3LVL5	CRISP3	200	13	3	3	Oxidation (M); Pyro-glu from Q	35.739	51.784	0	100	0	0	0	0	0	0	0	0	94.3941	72.7601	0	64.468	68.3731	0	0	17.8695	0	64.00:-:64.00:-:-:-:-:-:-:-:-:64.00:-:64.00:64.00:-:-:64.00:-:64.00:64.00	27025	Cysteine rich secretory protein 3 OS=Sus scrofa GN=CRISP3 PE=1 SV=1	Cysteine rich secretory protein 3	CRISP3	CRISP3	Cysteine rich secretory protein 3
434	9567	tr|J9JIL4|J9JIL4_PIG	J9JIL4	BGLAP	200	15	3	3		0	0	0	70.0206	0	0	66.9023	0	0	72.8557	42.4318	52.1626	63.2421	37.8434	0	15.3754	54.9144	30.7507	67.3355	68.0702	100	-:-:64.00:-:-:64.00:-:-:64.00:64.00:64.00:64.00:-:64.00:64.00:64.00:64.00:64.00:64.00:-:64.00	10854	Osteocalcin OS=Sus scrofa GN=BGLAP PE=3 SV=1	Osteocalcin	BGLAP	BGLAP	Osteocalcin
637	9046	tr|J9JIL5|J9JIL5_PIG	J9JIL5	S100	200	70	5	5	Carbamidomethylation; Deamidation (NQ)	0	91.1671	90.0261	83.3672	67.4972	83.2598	71.6861	69.7097	89.5985	84.0658	72.4131	0	33.7486	94.5368	0	86.539	0	89.8232	83.7406	100	0	11.43:7.35:4.76:1.00:10.85:1.32:1.21:2.81:6.00:1.10:0:16.88:0:8.53:0:15.45:8.94:16.98:0:0:0.02	11049	Protein S100 OS=Sus scrofa GN=LOC100620367 PE=1 SV=1	Protein S100	LOC100620367	S100	Protein S100
371	8779	tr|K7GKE7|K7GKE7_PIG	K7GKE7	HP	200	21	6	6	Oxidation (M)	48.3683	82.5383	8.67691	32.3966	0	68.0693	42.4601	17.3538	72.7356	68.2965	72.9387	77.4029	85.3242	61.5093	0	70.2994	61.4265	44.4706	63.6547	100	79.2146	64.00:64.00:64.00:-:64.00:64.00:64.00:64.00:64.00:64.00:64.00:64.00:-:64.00:64.00:64.00:64.00:64.00:64.00:64.00:64.00	33699	Haptoglobin OS=Sus scrofa GN=HP PE=1 SV=1	Haptoglobin	HP	HP	Haptoglobin
294	9020	tr|K7GKF8|K7GKF8_PIG	K7GKF8	SRPX	200	8	3	3	Deamidation (NQ)	45.8535	0	0	100	29.4908	0	74.5605	0	0	62.4074	14.7454	0	50.2858	0	0	0	68.1077	88.0849	90.6382	92.2301	94.5175	0:0:64.00:1.00:0:14.82:0:0:8.01:0.25:0:0:0:0:10.81:56.44:64.00:26.53:29.53:3.56:3.66	48240	Sushi repeat containing protein X-linked (Fragment) OS=Sus scrofa GN=SRPX PE=1 SV=1	Sushi repeat containing protein X-linked (Fragment)	SRPX	SRPX	Sushi repeat containing protein X-linked (Fragment)
366	8603	tr|K7GKJ8|K7GKJ8_PIG	K7GKJ8	PGK1	200	28	7	5		45.9979	90.0203	100	0	0	26.1898	0	0	0	13.0949	0	0	79.8626	56.4254	0	42.8741	0	30.6247	56.7191	77.0235	72.7991	64.00:64.00:-:-:64.00:-:-:-:64.00:-:-:64.00:-:64.00:-:64.00:64.00:64.00:64.00:64.00:64.00	40203	Phosphoglycerate kinase (Fragment) OS=Sus scrofa GN=PGK1 PE=3 SV=1	Phosphoglycerate kinase (Fragment)	PGK1	PGK1	Phosphoglycerate kinase (Fragment)
676	8936	tr|K7GLK5|K7GLK5_PIG	K7GLK5	RPS16	200	31	4	4		17.8697	52.6151	0	0	0	0	0	0	0	0	0	0	0	0	0	0	0	35.7394	53.7706	100	74.5005	64.00:-:-:-:-:-:-:-:-:-:-:-:-:-:-:64.00:64.00:64.00:64.00:64.00:-	14533	40S ribosomal protein S16 OS=Sus scrofa GN=RPS16 PE=3 SV=1	40S ribosomal protein S16	RPS16	RPS16	40S ribosomal protein S16
1207	9330	tr|K7GLM2|K7GLM2_PIG	K7GLM2	NDUFB11	24.59	22	2	2		0	100	0	0	0	0	0	0	0	0	0	0	0	0	0	90.4168	0	45.2084	0	0	0	64.00:-:-:-:-:-:-:-:-:-:-:-:-:64.00:-:64.00:-:-:-:-:-	12649	NADH:ubiquinone oxidoreductase subunit B11 OS=Sus scrofa GN=NDUFB11 PE=1 SV=1	NADH:ubiquinone oxidoreductase subunit B11	NDUFB11	NDUFB11	NADH:ubiquinone oxidoreductase subunit B11
710	9227	tr|K7GLV7|K7GLV7_PIG	K7GLV7	S100	200	22	5	3		38.8263	0	0	0	0	0	0	0	0	0	0	0	0	100	0	19.4132	0	0	0	0	0	-:-:-:-:-:-:-:-:-:-:-:64.00:-:64.00:-:-:-:-:-:64.00:-	13959	Uncharacterized protein OS=Sus scrofa GN=LOC100621379 PE=1 SV=1	obsolete	S100	S100	S100 protein	Uniprot listed as obsolete, NIH Smart Blast associates with protein S100
772	9143	tr|K7GM72|K7GM72_PIG	K7GM72	SSR4	200	13	2	2		0	73.728	0	0	0	0	10.2569	0	0	0	0	0	20.5138	0	25.1781	50.2178	0	58.8003	67.3874	100	73.9054	64.00:-:-:-:-:64.00:-:-:-:-:-:-:64.00:64.00:-:64.00:64.00:64.00:64.00:-:64.00	17830	Signal sequence receptor subunit 4 (Fragment) OS=Sus scrofa GN=SSR4 PE=1 SV=1	Signal sequence receptor subunit 4 (Fragment)	SSR4	SSR4	Signal sequence receptor subunit 4 (Fragment)
639	9409	tr|K7GMM3|K7GMM3_PIG	K7GMM3	S100A10	200	33	3	2	Deamidation (NQ)	0	30.4348	0	55.4246	0	0	10.3313	0	0	0	0	0	35.2445	53.5357	0	9.31017	0	33.4903	4.65508	100	0	64.00:-:64.00:-:-:64.00:-:-:-:-:-:64.00:-:64.00:-:64.00:64.00:64.00:-:-:64.00	9396	Protein S100-A10 OS=Sus scrofa GN=S100A10 PE=3 SV=1	Protein S100-A10	S100A10	S100A10	Protein S100-A10
230	8491	tr|K7GMR8|K7GMR8_PIG	K7GMR8	SERPINE2	200	34	11	10	Oxidation (M)	57.262	46.0701	31.0358	62.7495	15.2974	0	30.5947	0	0	80.677	0	0	46.9794	95.1599	78.8204	78.5364	77.4123	53.9838	82.2356	100	91.7386	4.46:1.45:10.69:1.00:0:1.90:0:0:32.61:0:0:63.34:29.53:31.60:25.69:10.68:54.82:45.58:28.11:11.88:5.33	52392	Serpin family E member 2 (Fragment) OS=Sus scrofa GN=SERPINE2 PE=1 SV=1	Serpin family E member 2 (Fragment)	SERPINE2	SERPINE2	Serpin family E member 2 (Fragment)
363	8502	tr|K7GMS2|K7GMS2_PIG	K7GMS2	PLS3	200	12	7	4		63.9614	97.6897	85.516	94.8804	0	70.5814	52.5068	47.7835	80.5349	74.7082	0	0	58.3914	23.8917	0	0	0	0	100	93.3774	87.9912	64.00:64.00:64.00:-:64.00:64.00:64.00:64.00:64.00:-:-:64.00:-:-:-:-:64.00:64.00:64.00:64.00:64.00	70797	Plastin 3 OS=Sus scrofa GN=PLS3 PE=1 SV=1	Plastin 3	PLS3	PLS3	Plastin 3
1011	9173	tr|K7GN90|K7GN90_PIG	K7GN90	CD44	200	3	2	2		0	72.1884	22.2593	0	0	21.6464	0	0	0	0.835432	0	0	1.67086	21.0918	0	59.2296	0	29.3177	25.103	54.8954	100	64.00:64.00:-:-:64.00:-:-:-:64.00:-:-:64.00:-:64.00:-:64.00:64.00:64.00:64.00:-:64.00	81161	CD44 molecule (Indian blood group) OS=Sus scrofa GN=CD44 PE=1 SV=1	CD44 molecule (Indian blood group)	CD44	CD44	CD44 molecule (Indian blood group)
468	9283	tr|K7GP14|K7GP14_PIG	K7GP14	IBSP	200	9	5	5	Deamidation (NQ)	37.9919	69.0691	84.2366	61.3043	49.5134	15.2053	37.1102	34.8561	60.6867	30.4105	40.2371	64.5096	54.1047	50.6482	65.0309	48.4739	83.8888	36.6678	54.7597	62.7861	100	2.68:4.69:1.67:1.00:0.26:0.41:0.41:0.48:0.32:0.38:0.69:0.94:2.42:1.00:6.77:0.64:2.05:1.05:8.74:0.64:1.27	34691	Bone sialoprotein 2 OS=Sus scrofa GN=IBSP PE=4 SV=1	Bone sialoprotein 2	IBSP	IBSP	Bone sialoprotein 2
353	8575	tr|K7GP66|K7GP66_PIG	K7GP66	ITGB4	86.87	7	8	7		0	0	0	0	0	0	0	0	54.7125	0	0	21.3684	0	0	0	78.8631	0	93.3057	0	100	42.7369	-:-:-:-:-:-:-:64.00:-:-:64.00:-:-:64.00:-:64.00:-:64.00:64.00:-:-	195002	Integrin beta OS=Sus scrofa GN=ITGB4 PE=1 SV=1	Integrin beta	ITGB4	ITGB4	Integrin beta
7	9223	tr|K7GPB2|K7GPB2_PIG	K7GPB2	AMELXP56	200	69	32	8	Oxidation (M); Deamidation (NQ); HexNAcylation (N); Phosphorylation (STY)	88.4916	37.4382	53.7641	70.4321	75.1484	38.5994	100	52.4732	97.8422	48.0039	73.8358	96.4552	66.5632	68.99	86.3184	48.8262	79.3226	57.2186	0	16.0889	32.1778	0.02:0.08:0.54:1.00:0.06:8.94:0.11:2.17:0.07:0.57:2.21:0.49:2.84:0.09:1.37:0.24:0:0.02:0.02:4.47:0.43	8221	Uncharacterized protein OS=Sus scrofa GN=AMELX PE=4 SV=1	obsolete	AMELXP56	AMELXP56	LRAP precursor	Uniprot listed as obsolete, NIH Smart Blast associates with Amelogenin
1145	9299	tr|K7GPF5|K7GPF5_PIG	K7GPF5	CD248	89.22	4	3	3		0	51.7953	0	77.0806	0	0	0	0	0	48.0067	0	0	24.0034	100	0	62.272	0	0	0	0	0	64.00:-:64.00:-:-:-:-:-:64.00:-:-:64.00:-:64.00:-:-:-:-:-:-:64.00	82053	CD248 molecule OS=Sus scrofa GN=CD248 PE=4 SV=1	CD248 molecule	CD248	CD248	CD248 molecule
356	8788	tr|K7GPN9|K7GPN9_PIG	K7GPN9	VCAN	200	4	7	6		28.2192	45.3134	0	51.5759	0	0	43.2359	0	0	46.5979	0	0	9.64723	51.0597	20.1819	46.52	19.2945	27.2533	76.1586	100	94.4082	64.00:-:64.00:-:-:64.00:-:-:64.00:-:-:64.00:64.00:64.00:64.00:64.00:64.00:64.00:64.00:64.00:64.00	178419	Versican OS=Sus scrofa GN=VCAN PE=1 SV=1	Versican	VCAN	VCAN	Versican
493	9003	tr|K7GPW1|K7GPW1_PIG	K7GPW1	CFI	200	12	7	7	Deamidation (NQ)	78.6419	58.1703	88.7277	85.6557	76.7834	30.1493	50.9864	0	0	100	97.4548	15.0747	0	72.4943	93.7041	43.8467	80.3915	34.3158	52.0491	0	93.7708	0.47:0.92:1.12:1.00:0.42:0.36:0:0:2.08:1.26:0.04:0.76:1.71:0.36:1.04:0.34:0.68:0:0.81:1.33:0	66661	Complement factor I OS=Sus scrofa GN=CFI PE=1 SV=1	Complement factor I	CFI	CFI	Complement factor I
234	8455	tr|K7GQ48|K7GQ48_PIG	K7GQ48	A2M	200	12	10	10	Deamidation (NQ)	31.3756	72.5254	42.3325	82.8312	0	61.4697	73.7658	15.6878	0	65.3632	48.5133	57.216	89.5323	51.7555	39.4085	100	49.1252	68.7934	74.3302	93.3097	96.3169	64.00:64.00:64.00:-:64.00:64.00:64.00:-:64.00:64.00:64.00:64.00:64.00:64.00:64.00:64.00:64.00:64.00:64.00:64.00:64.00	154578	Alpha-2-macroglobulin (Fragment) OS=Sus scrofa GN=A2M PE=1 SV=1	Alpha-2-macroglobulin (Fragment)	A2M	A2M	Alpha-2-macroglobulin (Fragment)
390	8693	tr|K7GQW2|K7GQW2_PIG	K7GQW2	S100A8	200	50	7	6	Oxidation (M); Deamidation (NQ)	86.9591	32.8163	34.0661	0	0	4.75213	0	0	2.37607	0	0	0	0	100	13.7831	80.0892	40.6348	13.1061	52.5826	0	0	64.00:64.00:-:-:64.00:-:-:64.00:-:-:-:64.00:64.00:64.00:64.00:64.00:64.00:-:-:64.00:-	16967	S100 calcium binding protein A8 OS=Sus scrofa GN=S100A8 PE=1 SV=1	S100 calcium binding protein A8	S100A8	S100A8	S100 calcium binding protein A8
483	8964	tr|K7GQZ6|K7GQZ6_PIG	K7GQZ6	ATP6AP2	23.61	8	2	2	Deamidation (NQ)	0	0	0	0	0	100	0	0	0	0	0	0	0	0	0	0	0	0	0	0	0	-:-:-:-:64.00:-:-:-:-:-:-:-:-:-:-:-:-:-:-:-:-	35766	ATPase H+ transporting accessory protein 2 OS=Sus scrofa GN=ATP6AP2 PE=1 SV=1	ATPase H+ transporting accessory protein 2	ATP6AP2	ATP6AP2	ATPase H+ transporting accessory protein 2
668	8880	tr|K7GR72|K7GR72_PIG	K7GR72	SLC4A1	200	5	3	3	Deamidation (NQ)	0	0	0	0	0	0	0	0	0	0	0	0	0	3.48595	0	6.9719	0	62.537	0	100	0	-:-:-:-:-:-:-:-:-:-:-:64.00:-:64.00:-:64.00:-:64.00:-:-:-	103868	Anion exchange protein OS=Sus scrofa GN=SLC4A1 PE=1 SV=1	Anion exchange protein	SLC4A1	SLC4A1	Anion exchange protein
118	8342	tr|K7GRB4|K7GRB4_PIG	K7GRB4	PHEX	200	34	21	21	Deamidation (NQ); Pyro-glu from Q	0	0	0	99.7837	0	0	91.9655	0	0	100	0	0	87.1057	0	0	20.666	54.463	41.3321	92.8243	0	80.2868	-:-:64.00:-:-:64.00:-:-:64.00:-:-:-:-:64.00:64.00:64.00:64.00:-:64.00:-:64.00	86308	Phosphate regulating endopeptidase homolog X-linked OS=Sus scrofa GN=PHEX PE=4 SV=1	Phosphate regulating endopeptidase homolog X-linked	PHEX	PHEX	Phosphate regulating endopeptidase homolog X-linked
1056	9308	tr|K7GRW3|K7GRW3_PIG	K7GRW3	S100A4	200	43	3	3		4.8735	9.74699	16.7737	0	0	0	0	0	0	0	0	0	0	43.3517	0	49.0003	0	66.8504	87.3977	100	58.2462	64.00:64.00:-:-:-:-:-:-:-:-:-:64.00:-:64.00:-:64.00:64.00:64.00:64.00:64.00:-	7011	S100 calcium binding protein A4 (Fragment) OS=Sus scrofa GN=S100A4 PE=1 SV=6	S100 calcium binding protein A4 (Fragment)	S100A4	S100A4	S100 calcium binding protein A4 (Fragment)
528	9482	tr|K7GRY0|K7GRY0_PIG	K7GRY0	UBA1	200	5	3	3		0	0	0	97.7981	0	0	100	0	0	99.3521	0	0	76.2447	0	0	0	34.7614	7.84814	25.8599	15.6963	31.8728	-:-:64.00:-:-:64.00:-:-:64.00:-:-:-:-:-:64.00:64.00:64.00:64.00:64.00:-:64.00	107489	Ubiquitin like modifier activating enzyme 1 (Fragment) OS=Sus scrofa GN=UBA1 PE=1 SV=1	Ubiquitin like modifier activating enzyme 1 (Fragment)	UBA1	UBA1	Ubiquitin like modifier activating enzyme 1 (Fragment)
271	8388	tr|K7GSR6|K7GSR6_PIG	K7GSR6	NT5E	200	36	15	15	Deamidation (NQ)	0	100	20.9611	0	0	0	0	0	0	41.9222	0	0	46.5307	0	0	78.022	0	82.0732	0	62.3228	0	64.00:64.00:-:-:-:-:-:-:64.00:-:-:-:-:64.00:-:64.00:-:64.00:-:-:64.00	62881	5'-nucleotidase ecto OS=Sus scrofa GN=NT5E PE=1 SV=1	5'-nucleotidase ecto	NT5E	NT5E	5'-nucleotidase ecto
267	8525	tr|K7GT00|K7GT00_PIG	K7GT00	COL14A1	200	8	8	8		67.3459	81.8978	0	0	0	0	0	29.0349	0	0	0	73.7176	0	74.938	76.5647	75.3457	0	58.0699	85.4543	100	97.915	64.00:-:-:-:-:-:64.00:-:-:-:64.00:64.00:64.00:64.00:-:64.00:64.00:64.00:64.00:64.00:-	179887	Collagen type XIV alpha 1 chain (Fragment) OS=Sus scrofa GN=COL14A1 PE=1 SV=1	Collagen type XIV alpha 1 chain (Fragment)	COL14A1	COL14A1	Collagen type XIV alpha 1 chain (Fragment)
744	9454	tr|K7GT48|K7GT48_PIG	K7GT48	CDH2	200	6	2	2		0	0	0	81.2241	0	0	67.8914	44.6495	85.8336	88.2345	0	0	0	0	22.3247	0	0	0	79.0355	0	100	-:-:64.00:-:-:64.00:64.00:64.00:64.00:-:-:-:64.00:-:-:-:64.00:-:64.00:-:-	43612	Cadherin 2 (Fragment) OS=Sus scrofa GN=CDH2 PE=1 SV=1	Cadherin 2 (Fragment)	CDH2	CDH2	Cadherin 2 (Fragment)
431	8725	tr|K7ZJP7|K7ZJP7_PIG	K7ZJP7	IGHM	200	19	5	4		36.3272	58.543	35.2618	0	0	0	0	0	0	0	0	0	0	45.4146	0	15.2	0	0	65.0865	100	30.4001	64.00:64.00:-:-:-:-:-:-:-:-:-:64.00:-:64.00:-:-:64.00:64.00:64.00:64.00:-	49283	IgM heavy chain constant region (Fragment) OS=Sus scrofa GN=IGHM PE=4 SV=1	IgM heavy chain constant region (Fragment)	IGHM	IGHM	IgM heavy chain constant region (Fragment)
851	8876	tr|K7ZRK0|K7ZRK0_PIG	K7ZRK0	IGHA	200	21	5	5		100	78.4176	76.4215	0	57.6072	53.21	38.6977	19.3488	0	43.5485	0	0	61.7099	96.7995	75.6302	0	63.4791	0	44.1894	83.6672	0	2.86:1.85:0:1.00:1.50:0.28:0.11:0:0.44:0:0:8.42:2.78:0:1.30:0:0.70:2.18:0:14.44:1.23	36614	IgA heavy chian constant region (Fragment) OS=Sus scrofa GN=IGHA PE=4 SV=1	IgA heavy chian constant region (Fragment)	IGHA	IGHA	IgA heavy chian constant region (Fragment)
399	8843	tr|K9IVL7|K9IVL7_PIG	K9IVL7	LRP1	200	1	4	3	Deamidation (NQ)	93.1416	36.6543	56.2746	0	0	0	0	0	0	0	0	0	0	46.7774	0	93.9619	0	18.3272	86.7615	100	0	64.00:64.00:-:-:-:-:-:-:-:-:-:64.00:-:64.00:-:64.00:64.00:64.00:-:64.00:-	504967	Prolow-density lipoprotein receptor-related protein 1 OS=Sus scrofa GN=LRP1 PE=2 SV=1	Prolow-density lipoprotein receptor-related protein 1	LRP1	LRP1	Prolow-density lipoprotein receptor-related protein 1
78	8333	tr|K9IVP5|K9IVP5_PIG	K9IVP5	MYH9	200	26	42	3	Deamidation (NQ); Pyro-glu from Q	0	41.2482	0	49.0521	0	0	48.312	0	0	51.5291	0	15.7033	52.7626	48.1936	0	31.4066	35.7822	32.5677	58.4932	86.2468	100	64.00:-:64.00:-:-:64.00:-:-:64.00:-:64.00:64.00:-:64.00:64.00:64.00:64.00:64.00:64.00:-:64.00	226452	N-myosin-9 OS=Sus scrofa GN=MYH9 PE=2 SV=1	N-myosin-9	MYH9	MYH9	N-myosin-9
83	8346	tr|K9IVQ6|K9IVQ6_PIG	K9IVQ6	PLEC	200	24	63	61	Deamidation (NQ)	42.3314	92.4793	65.797	91.7632	8.61513	65.7103	90.3518	0	59.4708	89.8438	41.9477	65.133	79.4981	56.5401	4.30756	60.7621	66.9133	66.0624	82.3053	100	89.0047	45.14:9.32:42.69:1.00:28.64:39.74:0:2.76:45.49:3.12:4.19:8.44:0.80:12.51:14.44:20.26:49.14:36.33:20.86:6.16:27.72	402918	Plectin (Fragment) OS=Sus scrofa GN=PLEC PE=2 SV=1	Plectin (Fragment)	PLEC	PLEC	Plectin (Fragment)
898	9372	tr|K9IVR7|K9IVR7_PIG	K9IVR7	WDR1	14.52	5	2	2		0	0	62.6654	0	0	2.42215	0	0	0	0	0	0	73.7669	0	0	0	0	0	4.84431	100	43.3112	-:64.00:-:-:64.00:-:-:-:-:-:-:-:-:-:-:-:64.00:64.00:64.00:-:64.00	66187	WD repeat-containing protein 1 OS=Sus scrofa GN=WDR1 PE=2 SV=1	WD repeat-containing protein 1	WDR1	WDR1	WD repeat-containing protein 1
1324	10173	tr|K9IVW4|K9IVW4_PIG	K9IVW4	MTPN	16.94	25	2	2	Deamidation (NQ)	19.4589	0	2.81769	0	0	6.03931	0	0	0	0	33.0275	100	0	22.5278	0	68.4287	0	5.63537	0	0	0	-:64.00:-:-:64.00:-:-:-:-:64.00:64.00:64.00:-:64.00:-:64.00:-:-:-:64.00:-	12895	Myotrophin OS=Sus scrofa GN=MTPN PE=2 SV=1	Myotrophin	MTPN	MTPN	Myotrophin
285	8883	tr|K9IW91|K9IW91_PIG	K9IW91	GCN1L1	200	2	4	4	Deamidation (NQ)	38.0182	0	0	0	0	0	74.4259	0	83.8596	0	0	100	0	19.0091	0	0	0	0	0	56.8006	56.4968	-:-:-:-:-:64.00:-:64.00:-:-:64.00:64.00:-:-:-:-:-:64.00:64.00:64.00:-	292739	GCN1 general control of amino-acid synthesis 1-like 1 OS=Sus scrofa GN=GCN1L1 PE=2 SV=1	GCN1 general control of amino-acid synthesis 1-like 1	GCN1L1	GCN1L1	GCN1 general control of amino-acid synthesis 1-like 1
839	9369	tr|K9IWA3|K9IWA3_PIG	K9IWA3	ATP6AP1	200	14	4	4	Phosphorylation (STY)	0	0	0	18.7735	0	0	6.22771	74.2077	96.6013	0	81.8244	100	0	0	0	12.4554	0	0	0	81.0805	24.7022	-:-:64.00:-:-:64.00:64.00:64.00:-:64.00:64.00:-:-:64.00:-:-:-:64.00:64.00:-:-	51507	V-type proton ATPase subunit S1 OS=Sus scrofa GN=ATP6AP1 PE=2 SV=1	V-type proton ATPase subunit S1	ATP6AP1	ATP6AP1	V-type proton ATPase subunit S1
215	8444	tr|K9IWF9|K9IWF9_PIG	K9IWF9	IQGAP1	18.65	9	10	2	Deamidation (NQ)	0	45.0007	0	100	22.5003	0	75.9722	0	0	0	0	0	74.8202	97.8687	0	0	0	0	49.145	96.3534	0	2.46:0:31.36:1.00:0:10.17:0:0:0:0:0:29.77:0:0:0:0:5.26:15.31:0:0:11.17	189217	Ras GTPase-activating-like protein IQGAP1 OS=Sus scrofa GN=IQGAP1 PE=2 SV=1	Ras GTPase-activating-like protein IQGAP1	IQGAP1	IQGAP1	Ras GTPase-activating-like protein IQGAP1
324	9395	tr|K9J4V0|K9J4V0_PIG	K9J4V0	SNRNP200	200	2	2	2		0	0	0	0	0	0	0	0	0	0	0	0	0	0	0	99.3833	0	0	18.4634	100	36.9269	-:-:-:-:-:-:-:-:-:-:-:-:-:64.00:-:-:64.00:64.00:64.00:-:-	244521	U5 small nuclear ribonucleoprotein 200 kDa helicase OS=Sus scrofa GN=SNRNP200 PE=2 SV=1	U5 small nuclear ribonucleoprotein 200 kDa helicase	SNRNP200	SNRNP200	U5 small nuclear ribonucleoprotein 200 kDa helicase
401	8445	tr|K9J6M1|K9J6M1_PIG	K9J6M1	IQGAP2	200	9	11	11		62.2306	91.0919	80.9723	100	31.1153	69.7216	92.928	75.7623	70.3761	90.7559	70.8802	97.7857	77.8172	79.2802	63.4643	83.2483	80.2771	0	88.9482	82.3985	80.8402	64.00:44.85:64.00:1.00:52.82:64.00:43.65:7.24:64.00:19.53:64.00:54.44:15.72:64.00:62.19:0:64.00:39.34:33.17:18.03:53.15	180962	Ras GTPase-activating-like protein IQGAP2 OS=Sus scrofa GN=IQGAP2 PE=2 SV=1	Ras GTPase-activating-like protein IQGAP2	IQGAP2	IQGAP2	Ras GTPase-activating-like protein IQGAP2
26	8392	tr|L8B0W9|L8B0W9_PIG	L8B0W9	IGHG	200	47	30	2	Carbamidomethylation; Oxidation (M); Deamidation (NQ)	0	0	0	91.1624	0	0	91.8461	0	0	100	52.4383	70.1944	64.8218	0	0	0	0	26.2191	94.3495	85.5009	0	-:-:64.00:-:-:64.00:-:-:64.00:64.00:64.00:-:-:-:-:64.00:64.00:64.00:-:-:64.00	51130	IgG heavy chain OS=Sus scrofa GN=IGHG PE=2 SV=1	IgG heavy chain	IGHG	IGHG	IgG heavy chain
18	8385	tr|L8B180|L8B180_PIG	L8B180	IGHG	200	56	31	7	Carbamidomethylation; Oxidation (M); Deamidation (NQ)	78.8452	86.5317	68.4782	0	84.935	70.275	0	0	34.2391	0	0	0	78.0285	69.1748	88.8195	70.3897	100	84.413	0	0	0	1.01:0.12:0:1.00:0.46:0:0:0.02:0:0:0:0.19:1.44:0.26:4.05:1.28:0:0:0:0.69:0.49	50818	IgG heavy chain OS=Sus scrofa GN=IGHG PE=2 SV=1	IgG heavy chain	IGHG	IGHG	IgG heavy chain
214	8397	tr|M3VH45|M3VH45_PIG	M3VH45	ANXA6	200	32	18	18	Deamidation (NQ)	32.6451	57.1678	44.9719	46.8373	0	51.8539	74.7183	69.2025	87.9256	62.457	74.2624	100	45.3573	12.8855	25.7709	32.5263	44.4196	49.9052	81.9353	97.0887	95.7079	64.00:64.00:64.00:-:64.00:64.00:64.00:64.00:64.00:64.00:64.00:64.00:64.00:64.00:64.00:64.00:64.00:64.00:64.00:64.00:64.00	75869	Annexin OS=Sus scrofa GN=ANXA6 PE=2 SV=1	Annexin A6	ANXA6	ANXA6	Annexin A6
927	9329	tr|M3VHA3|M3VHA3_PIG	M3VHA3	IDUA	74.69	6	2	2		93.2543	0	0	85.3544	0	0	0	0	0	79.5141	0	0	0	75.4021	100	0	0	0	37.249	0	74.4981	-:-:64.00:-:-:-:-:-:64.00:-:-:64.00:64.00:-:-:-:64.00:-:64.00:64.00:-	71610	Alpha-L-iduronidase OS=Sus scrofa GN=IDUA PE=2 SV=1	Alpha-L-iduronidase	IDUA	IDUA	Alpha-L-iduronidase
644	8801	tr|M3VK21|M3VK21_PIG	M3VK21	SLC25A12	200	8	4	4		0	68.9919	0	0	0	0	0	0	0	0	0	0	0	0	51.4999	0	0	25.75	0	100	91.6513	64.00:-:-:-:-:-:-:-:-:-:-:-:64.00:-:-:64.00:-:64.00:64.00:-:-	74769	Solute carrier family 25 (Aspartate glutamate carrier) member 12 OS=Sus scrofa GN=SLC25A12 PE=2 SV=1	Solute carrier family 25 (Aspartate glutamate carrier) member 12	SLC25A12	SLC25A12	Solute carrier family 25 (Aspartate glutamate carrier) member 12
426	70	O02668|ITIH2_PIG	O02668	ITIH2	200	10	6	6		0	0	0	77.4665	0	68.3252	0	0	0	71.5774	0	0	0	27.5155	0	0	0	0	55.0311	61.761	100	-:-:64.00:-:64.00:-:-:-:64.00:-:-:64.00:-:-:-:-:64.00:64.00:64.00:-:-	104622	Inter-alpha-trypsin inhibitor heavy chain H2 OS=Sus scrofa GN=ITIH2 PE=2 SV=1	Inter-alpha-trypsin inhibitor heavy chain H2	ITIH2	ITIH2	Inter-alpha-trypsin inhibitor heavy chain H2
225	22	O02705|HS90A_PIG	O02705	HSP90AA1	200	26	15	7	Carbamidomethylation	43.0342	87.1464	78.1863	69.6934	0	74.1296	18.9874	0	37.9748	0	0	0	61.9292	62.3109	52.9811	56.0916	66.3306	59.7045	76.1278	100	88.4627	64.00:64.00:64.00:-:64.00:64.00:-:64.00:-:-:-:64.00:64.00:64.00:64.00:64.00:64.00:64.00:64.00:64.00:64.00	84775	Heat shock protein HSP 90-alpha OS=Sus scrofa GN=HSP90AA1 PE=2 SV=3	Heat shock protein HSP 90-alpha	HSP90AA1	HSP90AA1	Heat shock protein HSP 90-alpha
135	19	O11780|BGH3_PIG	O11780	TGFBI	200	33	16	4	Deamidation (NQ)	0	62.4678	0	84.7219	0	0	65.9006	0	0	68.2378	0	0	15.8119	55.7936	46.7825	7.90597	77.1982	62.0689	91.272	54.6551	100	64.00:-:64.00:-:-:64.00:-:-:64.00:-:-:64.00:64.00:64.00:64.00:64.00:64.00:64.00:64.00:-:64.00	74462	Transforming growth factor-beta-induced protein ig-h3 OS=Sus scrofa GN=TGFBI PE=1 SV=1	Transforming growth factor-beta-induced protein ig-h3	TGFBI	TGFBI	Transforming growth factor-beta-induced protein ig-h3
843	178	O19062|CRP_PIG	O19062	CRP	200	17	2	2		19.4914	74.0451	62.1688	99.9595	0	0	99.9379	0	100	94.8481	38.9827	46.1166	45.0557	0	0	43.9126	56.6707	0	58.1094	60.1463	0	64.00:64.00:64.00:-:-:64.00:-:64.00:64.00:64.00:64.00:-:-:64.00:64.00:-:64.00:64.00:-:64.00:64.00	24925	C-reactive protein OS=Sus scrofa GN=CRP PE=2 SV=1	C-reactive protein	CRP	CRP	C-reactive protein
777	211	O97580|SUCB1_PIG	O97580	SUCLA2	31.96	4	2	2	Pyro-glu from Q	54.4915	100	94.3375	0	21.4691	10.7346	0	0	0	0	86.8112	0	0	52.9054	0	26.3043	69.2772	0	0	0	0	19.30:11.25:0:1.00:1.27:0:0:0:0:8.57:0:3.06:0:1.29:6.13:0:0:0:0:4.64:0	46259	Succinate--CoA ligase [ADP-forming] subunit beta mitochondrial (Fragment) OS=Sus scrofa GN=SUCLA2 PE=2 SV=1	Succinate--CoA ligase [ADP-forming] subunit beta mitochondrial (Fragment)	SUCLA2	SUCLA2	Succinate--CoA ligase [ADP-forming] subunit beta mitochondrial (Fragment)
10	5	O97939|ENAM_PIG	O97939	ENAM	200	46	74	74	Oxidation (M); Deamidation (NQ); Pyro-glu from Q; Phosphorylation (STY)	64.5799	45.9477	35.8013	0	41.9205	27.9056	54.8213	57.7499	82.2102	0	64.7463	100	34.6832	43.2206	69.8154	28.681	1.62919	39.0028	0	3.25838	0	1.14:0.41:0:1.00:0.73:2.05:2.86:4.10:0:3.14:16.31:0.96:6.77:0.42:0.06:1.09:0:0.03:0:6.05:0.58	128352	Enamelin 89 or 142 kDa OS=Sus scrofa GN=ENAM PE=1 SV=1	Enamelin 89 or 142 kDa	ENAM	ENAM	Enamelin 89 or 142 kDa
251	58	P00336|LDHB_PIG	P00336	LDHB	200	31	11	5	Carbamidomethylation; Deamidation (NQ)	41.8794	74.3775	80.6595	100	47.1795	82.3137	81.7697	0	0	74.6155	14.8319	0	86.514	0	0	7.41596	56.0713	0	72.0739	81.1391	70.6011	6.36:7.35:41.00:1.00:25.62:10.64:0:0:7.38:0.06:0:0:0:0.06:1.76:0:9.45:5.91:2.62:0.84:17.55	36612	L-lactate dehydrogenase B chain OS=Sus scrofa GN=LDHB PE=1 SV=3	L-lactate dehydrogenase B chain	LDHB	LDHB	L-lactate dehydrogenase B chain
222	39	P00339|LDHA_PIG	P00339	LDHA	200	40	13	10	Carbamidomethylation; Deamidation (NQ)	0	96.6871	98.6452	66.9255	0	99.5308	0	0	100	0	51.2649	78.4636	85.0862	58.0408	0	52.3983	11.888	23.7759	55.8722	90.4452	70.7615	64.00:64.00:64.00:-:64.00:-:-:64.00:-:64.00:64.00:64.00:-:64.00:64.00:64.00:64.00:64.00:64.00:-:64.00	36619	L-lactate dehydrogenase A chain OS=Sus scrofa GN=LDHA PE=1 SV=3	L-lactate dehydrogenase A chain	LDHA	LDHA	L-lactate dehydrogenase A chain
275	42	P00346|MDHM_PIG	P00346	MDH2	35.11	34	10	2	Carbamidomethylation	0	0	95.0635	21.0715	42.1429	79.6769	0	0	98.137	0	0	0	74.7723	0	64.1057	0	0	0	0	100	61.6302	0:13.53:0.25:1.00:17.10:0:0:6.47:0:0:0:0:3.51:0:0:0:0:13.98:1.45:0:6.46	35603	Malate dehydrogenase mitochondrial OS=Sus scrofa GN=MDH2 PE=1 SV=2	Malate dehydrogenase mitochondrial	MDH2	MDH2	Malate dehydrogenase mitochondrial
661	169	P00348|HCDH_PIG	P00348	HADH	200	13	2	2		0	56.3439	44.2127	0	0	0	0	0	0	0	0	0	35.0812	6.26651	0	12.533	0	37.3225	0	100	83.5273	64.00:64.00:-:-:-:-:-:-:-:-:-:64.00:-:64.00:-:64.00:-:64.00:64.00:-:64.00	34161	Hydroxyacyl-coenzyme A dehydrogenase mitochondrial OS=Sus scrofa GN=HADH PE=1 SV=2	Hydroxyacyl-coenzyme A dehydrogenase mitochondrial	HADH	HADH	Hydroxyacyl-coenzyme A dehydrogenase mitochondrial
157	44	P00355|G3P_PIG	P00355	GAPDH	200	36	10	5	Carbamidomethylation; Oxidation (M); Deamidation (NQ); Pyro-glu from Q	0	85.0909	100	0	0	0	0	94.2296	0	0	0	0	0	0	0	0	0	42.5455	0	97.7638	0	64.00:64.00:-:-:-:-:64.00:-:-:-:-:-:-:-:-:64.00:-:64.00:-:-:-	35836	Glyceraldehyde-3-phosphate dehydrogenase OS=Sus scrofa GN=GAPDH PE=1 SV=4	Glyceraldehyde-3-phosphate dehydrogenase	GAPDH	GAPDH	Glyceraldehyde-3-phosphate dehydrogenase
1121	224	P00503|AATC_PIG	P00503	GOT1	16.56	7	2	2		0	8.86912	0	56.117	0	100	18.3815	0	0	17.7382	0	0	20.4128	0	0	0	0	0	0	0	0	64.00:-:64.00:-:64.00:64.00:-:-:64.00:-:-:-:-:-:-:-:-:-:-:-:64.00	46475	Aspartate aminotransferase cytoplasmic OS=Sus scrofa GN=GOT1 PE=1 SV=3	Aspartate aminotransferase cytoplasmic	GOT1	GOT1	Aspartate aminotransferase cytoplasmic
388	85	P00506|AATM_PIG	P00506	GOT2	200	20	8	4		8.82499	79.214	61.8204	0	0	48.2482	0	0	51.0921	0	0	0	35.7403	65.69	17.65	65.9518	0	86.5699	42.1701	100	87.8294	64.00:64.00:-:-:64.00:-:-:64.00:-:-:-:64.00:64.00:64.00:-:64.00:64.00:64.00:64.00:64.00:64.00	47436	Aspartate aminotransferase mitochondrial OS=Sus scrofa GN=GOT2 PE=1 SV=2	Aspartate aminotransferase mitochondrial	GOT2	GOT2	Aspartate aminotransferase mitochondrial
466	94	P00889|CISY_PIG	P00889	CS	200	16	6	6		4.44099	100	79.0068	71.7415	0	66.0877	0	0	71.5601	0	0	0	37.0365	50.5733	0	0	0	55.3865	8.88198	86.3199	39.0863	64.00:64.00:64.00:-:64.00:-:-:64.00:-:-:-:64.00:-:-:-:64.00:64.00:64.00:64.00:64.00:64.00	51630	Citrate synthase mitochondrial OS=Sus scrofa GN=CS PE=1 SV=2	Citrate synthase mitochondrial	CS	CS	Citrate synthase mitochondrial
68	3	P01025|CO3_PIG	P01025	C3	200	33	44	13	Oxidation (M); Deamidation (NQ)	64.1122	68.2885	74.2078	95.1442	49.6972	66.2671	75.8088	0	0	89.5195	0	65.301	76.0629	78.3396	60.8408	73.2273	59.1121	24.8486	80.1455	100	97.1158	3.44:3.90:24.92:1.00:6.66:5.87:0:0:19.07:0:0.93:7.43:2.26:6.16:1.86:0.21:14.65:20.63:16.01:3.68:6.95	186806	Complement C3 OS=Sus scrofa GN=C3 PE=1 SV=2	Complement C3	C3	C3	Complement C3
105	98	P01846|LAC_PIG	P01846	IGLC	200	92	11	6	Carbamidomethylation; Deamidation (NQ)	49.3695	83.939	51.7803	99.213	64.7026	15.2231	80.8345	0	0	90.6857	35.4787	30.4462	96.4549	80.5071	49.1804	38.1252	100	56.477	57.1767	75.7224	82.2596	1.83:0.38:3.26:1.00:0.28:1.58:0:0:2.73:0.20:0.08:1.64:0.53:0.37:3.68:0.97:1.13:0.75:0.93:0.68:3.38	11003	Ig lambda chain C region OS=Sus scrofa PE=1 SV=1	Ig lambda chain C region	IGLC	IGLC	Ig lambda chain C region
51	55	P01965|HBA_PIG	P01965	HBA	200	92	15	14	Carbamidomethylation; Oxidation (M); Deamidation (NQ)	86.9438	62.0595	58.1903	34.273	10.7005	33.0836	30.6788	5.35027	54.8981	50.481	41.9909	69.24	64.9087	86.8563	61.7331	83.2076	18.2706	53.8589	65.8972	100	97.5893	16.65:9.72:3.28:1.00:7.02:2.65:0.70:3.21:9.75:3.92:8.49:64.00:18.67:64.00:1.42:16.24:36.60:64.00:64.00:64.00:22.20	15039	Hemoglobin subunit alpha OS=Sus scrofa GN=HBA PE=1 SV=1	Hemoglobin subunit alpha	HBA	HBA	Hemoglobin subunit alpha
174	82	P02189|MYG_PIG	P02189	MB	200	69	10	10	Oxidation (M); Deamidation (NQ)	23.4053	73.4974	84.7101	0	11.7027	58.4972	0	0	71.0066	0	59.9137	85.5874	34.297	52.6009	59.1863	61.8885	35.0969	95.5606	42.2172	100	82.2815	26.36:35.60:0:1.00:25.77:0:0:6.67:0:9.30:17.28:8.45:13.60:17.15:3.36:64.00:8.19:64.00:23.33:2.40:3.40	17085	Myoglobin OS=Sus scrofa GN=MB PE=1 SV=2	Myoglobin	MB	MB	Myoglobin
13	1	P02543|VIME_PIG	P02543	VIM	200	87	60	52	Carbamidomethylation; Oxidation (M); Deamidation (NQ); Pyro-glu from Q	41.6366	47.7274	26.7595	48.2591	30.1584	59.5809	26.5382	13.2691	45.1909	48.3972	36.3882	57.3152	42.9482	48.2166	31.1688	38.2965	36.2868	43.9487	70.8857	100	75.3352	3.31:0.48:3.37:1.00:18.56:0.63:0.26:0.79:3.97:1.04:2.33:3.51:1.06:1.99:1.47:3.88:34.44:64.00:14.92:3.02:2.59	53668	Vimentin OS=Sus scrofa GN=VIM PE=1 SV=2	Vimentin	VIM	VIM	Vimentin
337	59	P03974|TERA_PIG	P03974	VCP	200	17	7	7	Deamidation (NQ)	40.5974	81.1383	65.9348	74.6705	16.5735	0	64.2055	0	48.8886	65.4017	33.1471	0	59.9511	58.5318	0	65.3179	0	60.6503	60.8921	100	67.198	64.00:64.00:64.00:1.00:0:64.00:0:8.36:64.00:3.90:0:64.00:0:64.00:0:64.00:64.00:64.00:64.00:17.01:64.00	89289	Transitional endoplasmic reticulum ATPase OS=Sus scrofa GN=VCP PE=1 SV=5	Transitional endoplasmic reticulum ATPase	VCP	VCP	Transitional endoplasmic reticulum ATPase
657	133	P05027|AT1B1_PIG	P05027	ATP1B1	200	17	4	3	Deamidation (NQ)	0	100	0	0	0	0	0	0	50	0	0	0	0	0	0	0	0	0	0	0	0	64.00:-:-:-:-:-:-:64.00:-:-:-:-:-:-:-:-:-:-:-:-:-	35158	Sodium potassium-transporting ATPase subunit beta-1 OS=Sus scrofa GN=ATP1B1 PE=1 SV=2	Sodium potassium-transporting ATPase subunit beta-1	ATP1B1	ATP1B1	Sodium potassium-transporting ATPase subunit beta-1
408	90	P06867|PLMN_PIG	P06867	PLG	200	10	7	7	HexNAcylation (N)	0	0	0	100	0	0	65.2015	0	0	84.0324	12.6463	0	45.2983	59.6562	0	19.9125	3.03467	23.9567	90.0408	6.06933	92.1229	-:-:64.00:-:-:64.00:-:-:64.00:64.00:-:64.00:-:64.00:64.00:64.00:64.00:64.00:64.00:-:64.00	90615	Plasminogen OS=Sus scrofa GN=PLG PE=1 SV=3	Plasminogen	PLG	PLG	Plasminogen
283	80	P07200|TGFB1_PIG	P07200	TGFB1	200	18	5	5		0	0	0	100	26.9698	8.17859	72.3362	0	0	90.8955	0	0	62.4426	0	0	0	4.08929	0	60.3866	35.6878	10.6658	0:0:11.32:1.00:0.99:4.20:0:0:9.55:0:0:0:0:0:0.41:0:4.97:0.66:0.26:0:3.44	44294	Transforming growth factor beta-1 OS=Sus scrofa GN=TGFB1 PE=1 SV=1	Transforming growth factor beta-1	TGFB1	TGFB1	Transforming growth factor beta-1
387	52	P08059|G6PI_PIG	P08059	GPI	200	17	8	8		0	87.0202	76.561	86.186	25.1233	72.7885	76.2819	7.87523	73.8883	30.077	46.2235	67.5457	73.3107	53.5267	15.7505	71.5754	0	73.5741	75.3908	100	93.8956	64.00:31.52:64.00:1.00:64.00:41.39:0.26:10.30:1.43:3.22:7.36:7.66:0.48:36.78:0:54.03:64.00:64.00:64.00:0:38.38	63126	Glucose-6-phosphate isomerase OS=Sus scrofa GN=GPI PE=1 SV=3	Glucose-6-phosphate isomerase	GPI	GPI	Glucose-6-phosphate isomerase
518	73	P08132|ANXA4_PIG	P08132	ANXA4	200	28	8	7		0	49.5367	0	63.2718	0	0	51.8881	0	0	60.098	0	0	0	58.9379	0	0	0	24.7684	66.2347	100	65.3336	64.00:-:64.00:-:-:64.00:-:-:64.00:-:-:64.00:-:-:-:64.00:64.00:64.00:64.00:-:-	35829	Annexin A4 OS=Sus scrofa GN=ANXA4 PE=1 SV=2	Annexin A4	ANXA4	ANXA4	Annexin A4
535	259	P09858|TGFB2_PIG	P09858	TGFB2	200	7	3	3		0	0	0	100	0	0	72.1736	0	0	96.311	0	0	37.182	0	0	0	9.24623	0	57.6913	44.3288	18.4925	-:-:64.00:-:-:64.00:-:-:64.00:-:-:-:-:-:64.00:-:64.00:64.00:64.00:-:64.00	49922	Transforming growth factor beta-2 OS=Sus scrofa GN=TGFB2 PE=1 SV=2	Transforming growth factor beta-2	TGFB2	TGFB2	Transforming growth factor beta-2
313	122	P10668|COF1_PIG	P10668	CFL1	200	39	5	5	Carbamidomethylation	51.5965	87.1189	73.1031	36.0734	39.5573	46.5784	0	44.4402	53.043	0	58.7643	0	71.512	99.4858	18.0367	86.0245	38.1143	79.483	85.5723	100	88.9039	26.03:6.94:0.65:1.00:3.20:0:1.35:0.66:0:2.56:0:64.00:0.21:29.89:0.83:23.58:40.99:37.13:16.09:2.97:9.61	18519	Cofilin-1 OS=Sus scrofa GN=CFL1 PE=1 SV=3	Cofilin-1	CFL1	CFL1	Cofilin-1
929	202	P10775|RINI_PIG	P10775	RNH1	71.38	7	2	2		0	100	94.436	0	0	0	0	0	77.1871	0	0	0	87.5648	75.7821	0	83.6566	0	37.891	0	0	0	64.00:64.00:-:-:-:-:-:64.00:-:-:-:64.00:-:64.00:-:64.00:-:-:-:-:64.00	49023	Ribonuclease inhibitor OS=Sus scrofa GN=RNH1 PE=1 SV=1	Ribonuclease inhibitor	RNH1	RNH1	Ribonuclease inhibitor
411	99	P10859|HPLN1_PIG	P10859	HAPLN1	200	17	5	5	Deamidation (NQ)	49.2697	0	4.29489	11.997	0	2.14744	0	4.59832	42.5107	59.018	0	0	0	54.847	29.0358	57.3066	47.4312	32.2753	61.3472	87.7457	100	-:64.00:64.00:-:64.00:-:64.00:64.00:64.00:-:-:64.00:64.00:64.00:64.00:64.00:64.00:64.00:64.00:64.00:-	40261	Hyaluronan and proteoglycan link protein 1 OS=Sus scrofa GN=HAPLN1 PE=2 SV=1	Hyaluronan and proteoglycan link protein 1	HAPLN1	HAPLN1	Hyaluronan and proteoglycan link protein 1
485	66	P11708|MDHC_PIG	P11708	MDH1	200	28	7	4		21.8269	75.2654	80.4827	100	0	0	97.7188	0	0	0	0	0	66.8243	60.2806	0	0	69.649	0	52.8724	96.2906	43.6539	64.00:64.00:64.00:-:-:64.00:-:-:-:-:-:64.00:-:-:64.00:-:64.00:64.00:64.00:64.00:64.00	36454	Malate dehydrogenase cytoplasmic OS=Sus scrofa GN=MDH1 PE=1 SV=4	Malate dehydrogenase cytoplasmic	MDH1	MDH1	Malate dehydrogenase cytoplasmic
738	175	P12068|LYSC2_PIG	P12068	LYZ	200	15	2	2		0	0	0	100	52.6837	32.4013	93.6631	55.1599	0	83.4401	0	82.9609	74.2074	83.3473	0	98.1589	61.4648	16.2007	85.1134	0	0	0:0:23.85:1.00:0.46:15.18:1.14:0:8.64:0:2.46:7.69:0:26.62:1.71:0.10:15.01:0:0:0:4.45	16484	Lysozyme C-2 OS=Sus scrofa PE=1 SV=2	Lysozyme C-2	LYZ	LYZ	Lysozyme C-2
198	43	P14287|OSTP_PIG	P14287	SPP1	200	54	16	15	Deamidation (NQ); Phosphorylation (STY)	0	0	0	68.0681	0	0	66.219	0	0	69.0254	0	0	61.732	63.6608	0	59.3542	59.9271	29.6771	76.0467	85.3964	100	-:-:64.00:-:-:64.00:-:-:64.00:-:-:64.00:-:64.00:64.00:64.00:64.00:64.00:64.00:-:64.00	33669	Osteopontin OS=Sus scrofa GN=SPP1 PE=1 SV=1	Osteopontin	SPP1	SPP1	Osteopontin
282	15	P16276|ACON_PIG	P16276	ACO2	200	27	15	15		0	100	90.6935	77.6303	9.72577	46.2372	63.0718	0	0	68.3665	0	0	72.3757	36.4705	19.4515	48.3695	0	64.463	75.8155	99.3274	96.2828	64.00:64.00:50.90:1.00:17.60:20.99:0:0:33.89:0:0:4.42:1.77:11.04:0:36.73:64.00:64.00:64.00:0:42.80	85761	Aconitate hydratase mitochondrial OS=Sus scrofa GN=ACO2 PE=1 SV=1	Aconitate hydratase mitochondrial	ACO2	ACO2	Aconitate hydratase mitochondrial
193	40	P16293|FA9_PIG	P16293	F9	200	29	11	5	Carbamidomethylation; Deamidation (NQ); Pyro-glu from Q	0	68.3396	0	69.052	0	0	66.6103	0	51.8241	69.1549	0	0	0	25.9121	0	69.09	55.8361	78.8954	70.0435	100	80.0343	64.00:-:64.00:-:-:64.00:-:64.00:64.00:-:-:64.00:-:64.00:64.00:64.00:64.00:64.00:64.00:-:-	45516	Coagulation factor IX (Fragment) OS=Sus scrofa GN=F9 PE=1 SV=2	Coagulation factor IX (Fragment)	F9	F9	Coagulation factor IX (Fragment)
747	166	P17630|TCO1_PIG	P17630	TCN1	52.32	6	2	2		0	100	0	0	0	0	0	0	0	0	0	0	0	50	0	0	0	0	0	0	0	64.00:-:-:-:-:-:-:-:-:-:-:64.00:-:-:-:-:-:-:-:-:-	47095	Transcobalamin-1 OS=Sus scrofa GN=TCN1 PE=1 SV=2	Transcobalamin-1	TCN1	TCN1	Transcobalamin-1
196	51	P19619|ANXA1_PIG	P19619	ANXA1	200	37	13	3	Deamidation (NQ)	0	0	33.2133	0	0	0	0	0	0	0	0	0	0	90.353	0	100	0	87.4157	66.4266	81.7852	0	-:64.00:-:-:-:-:-:-:-:-:-:64.00:-:64.00:-:64.00:64.00:64.00:-:-:-	38759	Annexin A1 OS=Sus scrofa GN=ANXA1 PE=1 SV=3	Annexin A1	ANXA1	ANXA1	Annexin A1
81	16	P19620|ANXA2_PIG	P19620	ANXA2	200	63	23	23	Carbamidomethylation; Deamidation (NQ); Pyro-glu from Q	4.23951	73.8988	36.6462	0	21.5704	11.7347	21.3417	43.6757	48.0056	0	49.7487	60.8234	15.2379	26.7794	8.47902	63.7708	0	74.4308	66.4027	100	82.544	31.85:1.77:0:1.00:0.98:0.82:4.38:1.55:0:4.51:4.34:1.26:0.40:19.60:0:51.62:33.51:64.00:31.43:0.38:0.63	38542	Annexin A2 OS=Sus scrofa GN=ANXA2 PE=1 SV=4	Annexin A2	ANXA2	ANXA2	Annexin A2
75	54	P20112|SPRC_PIG	P20112	SPARC	200	51	20	20	Carbamidomethylation; Oxidation (M); Deamidation (NQ)	24.6791	66.9348	49.3581	90.7983	0	58.3011	90.0045	0	0	96.9385	0	0	73.8985	52.289	0	62.429	72.7246	67.5791	90.4028	87.2634	100	64.00:64.00:64.00:-:64.00:64.00:-:-:64.00:-:-:64.00:-:64.00:64.00:64.00:64.00:64.00:64.00:64.00:64.00	34240	SPARC OS=Sus scrofa GN=SPARC PE=1 SV=2	SPARC	SPARC	SPARC	SPARC
69	9	P20305|GELS_PIG	P20305	GSN	200	45	30	30	Deamidation (NQ)	0	72.8061	60.8	71.5185	26.263	65.3684	65.6975	100	90.3046	62.864	63.6282	79.9271	61.4302	13.1315	0	50.6142	37.9002	48.1483	74.5612	86.7528	76.2196	19.75:6.41:17.72:1.00:26.93:11.91:64.00:18.67:11.59:7.97:10.74:0.36:0:5.50:2.02:5.89:39.16:28.56:13.53:0:10.41	84775	Gelsolin (Fragment) OS=Sus scrofa GN=GSN PE=1 SV=1	Gelsolin (Fragment)	GSN	GSN	Gelsolin (Fragment)
425	163	P26234|VINC_PIG	P26234	VCL	200	4	2	2		39.48	73.8514	50.5747	75.3779	0	19.74	59.5574	0	89.4585	75.6574	75.5585	100	84.8314	75.5027	0	59.8482	0	61.2719	98.4594	80.5372	97.4323	64.00:64.00:64.00:-:64.00:64.00:-:64.00:64.00:64.00:64.00:64.00:-:64.00:-:64.00:64.00:64.00:64.00:64.00:64.00	123944	Vinculin OS=Sus scrofa GN=VCL PE=1 SV=4	Vinculin	VCL	VCL	Vinculin
636	157	P27917|APOC3_PIG	P27917	APOC3	200	45	4	4		0	16.4239	63.6983	88.3148	10.1152	31.1598	30.1091	5.05759	0	85.971	53.2606	0	54.257	66.4872	0	0	0	16.9532	91.4397	27.8716	100	1.22:12.33:64.00:1.00:6.25:2.55:0.72:0:64.00:7.11:0:20.25:0:0:0:1.97:64.00:1.31:64.00:0:11.32	10704	Apolipoprotein C-III OS=Sus scrofa GN=APOC3 PE=1 SV=2	Apolipoprotein C-III	APOC3	APOC3	Apolipoprotein C-III
154	28	P28491|CALR_PIG	P28491	CALR	200	48	16	16	Carbamidomethylation; Deamidation (NQ)	0	75.6838	60.6957	100	0	52.2235	96.4292	26.1117	71.8789	99.7766	0	69.4241	85.4058	0	0	0	71.6215	54.6968	99.6671	99.3137	86.4338	64.00:64.00:64.00:-:64.00:64.00:64.00:64.00:64.00:-:64.00:-:-:-:64.00:64.00:64.00:64.00:64.00:-:64.00	48288	Calreticulin OS=Sus scrofa GN=CALR PE=1 SV=3	Calreticulin	CALR	CALR	Calreticulin
611	164	P39035|CASA1_PIG	P39035	CSN1S1	200	24	5	5	Deamidation (NQ); Pyro-glu from Q; Phosphorylation (STY)	31.7936	0	67.84	0	5.00361	10.0072	43.452	64.7172	100	0	65.1795	57.0657	15.998	58.8639	0	26.5717	0	0	0	0	0	0:42.78:0:1.00:2.70:11.07:52.47:64.00:0:36.73:9.57:32.74:0:4.52:0:0:0:0:0:7.56:2.03	24148	Alpha-S1-casein OS=Sus scrofa GN=CSN1S1 PE=2 SV=1	Alpha-S1-casein	CSN1S1	CSN1S1	Alpha-S1-casein
746	196	P45846|DERM_PIG	P45846	DPT	200	10	2	2		0	0	0	0	23.8176	33.8223	79.0254	50.449	62.8933	90.2561	52.0348	64.014	63.49	0	11.9088	0	0	0	87.6464	100	96.8425	0:0:0:1.00:3.89:39.09:6.11:3.81:64.00:4.61:4.77:0:0.43:0:0:0:64.00:64.00:64.00:0:15.42	21994	Dermatopontin OS=Sus scrofa GN=DPT PE=1 SV=2	Dermatopontin	DPT	DPT	Dermatopontin
978	548	P49171|RS26_PIG	P49171	RPS26	200	21	2	2		0	39.9236	0	0	0	0	0	0	0	0	0	0	0	3.42067	0	1.71034	0	12.7592	83.7433	100	90.5808	64.00:-:-:-:-:-:-:-:-:-:-:64.00:-:64.00:-:64.00:64.00:64.00:64.00:-:-	13015	40S ribosomal protein S26 OS=Sus scrofa GN=RPS26 PE=1 SV=4	40S ribosomal protein S26	RPS26	RPS26	40S ribosomal protein S26
116	100	P50390|TTHY_PIG	P50390	TTR	200	65	13	13	Deamidation (NQ)	81.1832	78.1803	58.4654	81.8732	49.4211	27.0341	59.6445	4.48122	8.96244	60.7893	40.5957	53.3758	75.0916	70.6051	88.0135	62.3158	100	68.6974	37.9336	72.1573	52.6717	3.08:0.94:3.55:1.00:0.71:1.31:0.13:0.04:1.62:0.43:0.34:2.24:5.44:1.89:8.70:3.16:0.90:1.33:0.54:5.12:3.03	16081	Transthyretin OS=Sus scrofa GN=TTR PE=1 SV=1	Transthyretin	TTR	TTR	Transthyretin
169	41	P50828|HEMO_PIG	P50828	HPX	200	27	11	11	Carbamidomethylation; Deamidation (NQ); HexNAcylation (N)	26.1069	100	69.7919	36.755	20.7734	26.9726	38.1726	1.59229	26.0115	35.0656	41.4632	50.5356	68.1173	89.4005	24.3696	39.2316	58.1576	3.18457	39.519	34.6007	17.6449	12.18:3.22:1.43:1.00:2.38:1.50:0.50:0.30:1.58:1.28:0.78:8.72:1.11:1.98:3.21:0.75:2.84:0.77:0.42:1.50:4.74	51306	Hemopexin OS=Sus scrofa GN=HPX PE=1 SV=1	Hemopexin	HPX	HPX	Hemopexin
188	79	P51524|PF11_PIG	P51524	None	27.18	50	11	2	Carbamidomethylation; Deamidation (NQ); Pyro-glu from Q	0	0	0	0	0	0	0	0	0	0	0	0	0	60.578	30.289	100	0	0	0	0	0	-:-:-:-:-:-:-:-:-:-:-:64.00:64.00:64.00:-:-:-:-:-:-:-	23956	Prophenin and tritrpticin precursor (Fragment) OS=Sus scrofa PE=1 SV=1	Prophenin and tritrpticin precursor (Fragment)	None	None	Prophenin and tritrpticin precursor (Fragment)
855	189	P51779|CFAD_PIG	P51779	CFD	200	14	3	3		22.6515	0	0	64.2445	0	0	0	0	0	0	0	0	0	100	0	84.7502	0	0	0	0	45.3031	-:-:64.00:-:-:-:-:-:-:-:-:64.00:-:64.00:-:-:-:-:64.00:64.00:-	27764	Complement factor D OS=Sus scrofa GN=CFD PE=2 SV=1	Complement factor D	CFD	CFD	Complement factor D
509	108	P60662|MYL6_PIG	P60662	MYL6	200	40	6	6	Oxidation (M); Deamidation (NQ)	2.3488	63.3706	13.0556	0	0	21.7309	0	0	39.8302	11.4994	0	24.5991	18.4766	19.5951	1.1744	46.2236	15.4035	50.3559	55.9722	100	72.5755	64.00:64.00:-:-:64.00:-:-:64.00:64.00:-:64.00:64.00:64.00:64.00:64.00:64.00:64.00:64.00:64.00:64.00:64.00	16930	Myosin light polypeptide 6 OS=Sus scrofa GN=MYL6 PE=1 SV=2	Myosin light polypeptide 6	MYL6	MYL6	Myosin light polypeptide 6
1229	297	P60982|DEST_PIG	P60982	DSTN	69.88	17	2	2		80.304	86.8246	68.0247	0	0	53.1315	0	0	0	0	0	0	0	86.1036	0	26.5657	0	0	88.926	100	0	64.00:64.00:-:-:64.00:-:-:-:-:-:-:64.00:-:64.00:-:-:64.00:64.00:-:64.00:-	18506	Destrin OS=Sus scrofa GN=DSTN PE=1 SV=3	Destrin	DSTN	DSTN	Destrin
1049	162	P62272|RS18_PIG	P62272	RPS18	44.02	14	2	2		0	51.7006	0	0	0	31.7105	0	39.1347	83.9529	0	48.6502	100	0	37.8703	34.46	12.8072	0	25.6144	0	62.3189	0	64.00:-:-:-:64.00:-:64.00:64.00:-:64.00:64.00:64.00:64.00:64.00:-:64.00:-:64.00:-:-:-	17719	40S ribosomal protein S18 OS=Sus scrofa GN=RPS18 PE=1 SV=3	40S ribosomal protein S18	RPS18	RPS18	40S ribosomal protein S18
124	119	P62802|H4_PIG	P62802	HIST1H4	200	59	8	8	Oxidation (M); Deamidation (NQ)	44.1531	87.4226	52.185	26.8153	24.4268	22.2546	0	18.3927	80.2018	53.9108	19.9338	37.8223	75.7788	45.4106	64.0764	73.9216	9.19636	90.7879	81.884	100	95.887	64.00:8.92:1.06:1.00:1.58:0:0.53:52.02:16.45:0.42:1.04:6.55:43.65:64.00:0.21:64.00:64.00:64.00:64.00:8.27:64.00	11367	Histone H4 OS=Sus scrofa PE=1 SV=2	Histone H4	Histone H4	HIST1H4	Histone H4
288	150	P62895|CYC_PIG	P62895	CYCS	200	39	7	7	Deamidation (NQ)	0	73.7883	79.8498	58.7445	57.4434	46.3305	0	48.4172	63.6342	61.1945	76.6409	100	61.71	47.8466	23.1652	55.516	0	62.1203	57.9969	56.0483	0	4.11:5.35:0.95:1.00:0.67:0:0.40:0.45:1.41:4.06:17.09:0.35:0.04:0.89:0:2.10:1.60:0.43:0:0:1.46	11704	Cytochrome c OS=Sus scrofa GN=CYCS PE=1 SV=2	Cytochrome c	CYCS	CYCS	Cytochrome c
372	102	P62936|PPIA_PIG	P62936	PPIA	200	35	7	5		0	100	93.212	90.4956	0	26.2959	0	13.1479	0	77.7678	44.397	77.2802	64.5425	79.2037	35.6513	46.1437	27.4239	79.4712	88.5567	88.9442	75.0428	64.00:64.00:64.00:-:64.00:-:64.00:-:64.00:64.00:64.00:64.00:64.00:64.00:64.00:64.00:64.00:64.00:64.00:-:64.00	17869	Peptidyl-prolyl cis-trans isomerase A OS=Sus scrofa GN=PPIA PE=1 SV=2	Peptidyl-prolyl cis-trans isomerase A	PPIA	PPIA	Peptidyl-prolyl cis-trans isomerase A
179	50	P67937|TPM4_PIG	P67937	TPM4	200	35	11	3	Deamidation (NQ)	42.7381	52.8945	36.0395	0	0	44.4545	0	18.3329	0	0	0	0	9.16643	34.5179	38.9777	28.6757	54.9202	0	61.2482	100	80.5128	64.00:64.00:-:-:64.00:-:64.00:-:-:-:-:64.00:64.00:64.00:64.00:-:64.00:64.00:64.00:64.00:64.00	28522	Tropomyosin alpha-4 chain OS=Sus scrofa GN=TPM4 PE=2 SV=3	Tropomyosin alpha-4 chain	TPM4	TPM4	Tropomyosin alpha-4 chain
982	468	P67985|RL22_PIG	P67985	RPL22	200	19	2	2		0	22.9637	0	0	0	0	0	0	0	0	0	0	0	0	0	31.5772	0	3.95303	7.90606	100	19.5921	64.00:-:-:-:-:-:-:-:-:-:-:-:-:64.00:-:64.00:64.00:64.00:64.00:-:-	14759	60S ribosomal protein L22 OS=Sus scrofa GN=RPL22 PE=1 SV=2	60S ribosomal protein L22	RPL22	RPL22	60S ribosomal protein L22
501	96	P79263|ITIH4_PIG	P79263	ITIH4	200	9	6	3		33.6395	48.4797	32.9278	0	0	0	0	0	0	0	14.9065	46.757	0	100	0	69.7917	0	0	29.8131	68.0326	34.0782	64.00:64.00:-:-:-:-:-:-:-:64.00:64.00:64.00:-:64.00:-:-:64.00:64.00:64.00:64.00:-	102146	Inter-alpha-trypsin inhibitor heavy chain H4 OS=Sus scrofa GN=ITIH4 PE=1 SV=1	Inter-alpha-trypsin inhibitor heavy chain H4	ITIH4	ITIH4	Inter-alpha-trypsin inhibitor heavy chain H4
28	7	P79287|MMP20_PIG	P79287	MMP20	200	55	43	43	Oxidation (M); Deamidation (NQ)	0.501031	64.7997	14.1695	66.5254	6.82302	1.00206	54.9961	63.4316	92.5912	71.0897	67.0493	100	47.2661	4.04125	9.09788	54.4921	40.6847	70.2683	49.2607	35.645	0	17.63:0.92:18.84:1.00:1.43:10.26:18.25:21.84:27.91:14.89:37.22:0.76:1.11:12.82:5.38:36.76:13.82:2.19:0:0.90:8.00	54085	Matrix metalloproteinase-20 OS=Sus scrofa GN=MMP20 PE=2 SV=1	Matrix metalloproteinase-20	MMP20	MMP20	Matrix metalloproteinase-20
681	148	P79307|A4_PIG	P79307	APP	200	4	2	2	Deamidation (NQ)	0	0	0	62.5773	0	0	49.9417	0	0	71.6385	0	0	24.9709	69.8481	0	0	0	0	75.1204	81.1436	100	-:-:64.00:-:-:64.00:-:-:64.00:-:-:64.00:-:-:-:-:64.00:64.00:64.00:-:64.00	86961	Amyloid beta A4 protein OS=Sus scrofa GN=APP PE=2 SV=2	Amyloid beta A4 protein	APP	APP	Amyloid beta A4 protein
416	56	P79403|GANAB_PIG	P79403	GANAB	200	13	10	10	Pyro-glu from Q	0	31.2182	8.23645	0	23.3191	0	0	65.1074	100	62.631	68.5152	90.3728	0	39.3787	0	0	0	0	16.4729	82.8084	63.883	1.38:0.25:0:1.00:0:0:11.55:24.43:10.28:9.62:15.90:2.29:0:0:0:0:1.00:16.99:5.28:0:0	106662	Neutral alpha-glucosidase AB OS=Sus scrofa GN=GANAB PE=1 SV=1	Neutral alpha-glucosidase AB	GANAB	GANAB	Neutral alpha-glucosidase AB
359	110	P80031|GSTP1_PIG	P80031	GSTP1	200	38	5	4		21.0218	76.4342	93.5571	44.0155	71.0166	79.5147	36.4426	0	80.8914	53.4499	75.828	100	35.8934	63.4439	0	10.5109	33.6357	38.1659	0	87.3807	0	1.18:2.33:0.17:1.00:3.18:0.11:0:0.45:0.35:0.86:1.57:0.56:0:0.03:0.10:0.20:0:1.26:0:0.07:0.13	23497	Glutathione S-transferase P OS=Sus scrofa GN=GSTP1 PE=1 SV=2	Glutathione S-transferase P	GSTP1	GSTP1	Glutathione S-transferase P
218	107	P80310|S10AC_PIG	P80310	S100A12	200	92	12	11	Deamidation (NQ); Pyro-glu from Q	88.2827	9.12522	15.6826	0	0	4.56261	0	0	0	0	0	0	0	100	0	80.4516	0	0	0	38.0501	58.1851	64.00:64.00:-:-:64.00:-:-:-:-:-:-:64.00:-:64.00:-:-:-:64.00:64.00:64.00:-	10745	Protein S100-A12 OS=Sus scrofa GN=S100A12 PE=1 SV=2	Protein S100-A12	S100A12	S100A12	Protein S100-A12
767	167	P81608|SAL_PIG	P81608	SAL1	100.95	12	2	2		79.3575	0	0	0	0	0	0	0	0	0	0	0	0	100	24.8167	63.8555	0	12.4084	0	0	0	-:-:-:-:-:-:-:-:-:-:-:64.00:64.00:64.00:-:64.00:-:-:-:64.00:-	21588	Salivary lipocalin OS=Sus scrofa GN=SAL1 PE=1 SV=1	Salivary lipocalin	SAL1	SAL1	Salivary lipocalin
420	154	P82460|THIO_PIG	P82460	TXN	200	31	4	4	Deamidation (NQ)	35.1709	11.2003	67.1289	0	0	0	3.75804	0	0	0	0	0	0	87.485	7.51607	100	17.5447	65.8755	60.9167	92.8503	0	64.00:64.00:-:-:-:64.00:-:-:-:-:-:64.00:64.00:64.00:64.00:64.00:64.00:64.00:-:64.00:-	11829	Thioredoxin OS=Sus scrofa GN=TXN PE=1 SV=3	Thioredoxin	TXN	TXN	Thioredoxin
467	103	P83686|NB5R3_PIG	P83686	CYB5R3	200	26	5	5		0	15.652	4.90657	0	0	0	0	0	0	0	0	0	0	0	0	9.81313	0	26.8212	43.4492	100	58.934	64.00:64.00:-:-:-:-:-:-:-:-:-:-:-:64.00:-:64.00:64.00:64.00:64.00:-:-	30831	NADH-cytochrome b5 reductase 3 (Fragment) OS=Sus scrofa GN=CYB5R3 PE=1 SV=1	NADH-cytochrome b5 reductase 3 (Fragment)	CYB5R3	CYB5R3	NADH-cytochrome b5 reductase 3 (Fragment)
192	105	Q003G9|ODAM_PIG	Q003G9	ODAM	200	32	9	9	Oxidation (M); Deamidation (NQ); Pyro-glu from Q; HexNAcylation (N)	52.4002	79.9128	90.1307	32.7751	24.8122	12.4061	0	0	0	80.008	85.4572	0	65.3849	0	81.8384	90.4173	0	100	56.4985	0	0	64.00:64.00:1.68:1.00:0.66:0:0:0:64.00:64.00:0:0:64.00:64.00:0:64.00:23.89:0:0:13.80:33.15	30700	Odontogenic ameloblast-associated protein OS=Sus scrofa GN=ODAM PE=2 SV=1	Odontogenic ameloblast-associated protein	ODAM	ODAM	Odontogenic ameloblast-associated protein
749	8929	tr|Q06AS6|Q06AS6_PIG	Q06AS6	GNAI2	26.4	15	4	2		0	74.0996	20.9788	0	0	0	0	0	0	0	0	100	0	0	0	41.9577	0	64.8318	0	57.6083	0	64.00:64.00:-:-:-:-:-:-:-:-:64.00:-:-:64.00:-:64.00:-:64.00:-:-:-	40465	G protein subunit alpha i2 OS=Sus scrofa GN=GNAI2 PE=1 SV=1	G protein subunit alpha i2	GNAI2	GNAI2	G protein subunit alpha i2
1075	9044	tr|Q06DE7|Q06DE7_PIG	Q06DE7	CRNN	64.81	5	2	2		50	0	0	0	0	0	0	0	0	0	0	0	0	100	0	0	0	0	0	0	0	-:-:-:-:-:-:-:-:-:-:-:64.00:-:-:-:-:-:-:-:64.00:-	64306	Squamous epithelial induced stress protein 53 OS=Sus scrofa PE=4 SV=1	Squamous epithelial induced stress protein 53	CRNN	CRNN	Squamous epithelial induced stress protein 53
917	221	Q07717|B2MG_PIG	Q07717	B2M	86.75	15	2	2	Oxidation (M)	0	68.6461	0	0	0	0	74.8433	0	0	0	0	100	0	44.0434	0	88.0164	0	0	22.0217	74.6945	0	64.00:-:-:-:-:64.00:-:-:-:-:64.00:64.00:-:64.00:-:-:64.00:64.00:-:-:-	13362	Beta-2-microglobulin OS=Sus scrofa GN=B2M PE=1 SV=1	Beta-2-microglobulin	B2M	B2M	Beta-2-microglobulin
11	8327	tr|Q0PM28|Q0PM28_PIG	Q0PM28	SERPINF1	200	73	52	19	Carbamidomethylation; Oxidation (M); Deamidation (NQ); Pyro-glu from Q; Phosphorylation (STY)	0	0	2.99258	88.4263	0	0	85.1285	35.5197	0	97.4346	54.1293	36.2125	72.0432	0	0	5.98516	39.6381	13.2799	88.4103	81.3977	100	-:64.00:64.00:-:-:64.00:64.00:-:64.00:64.00:64.00:-:-:64.00:64.00:64.00:64.00:64.00:64.00:-:64.00	45627	Pigment epithelium-derived factor OS=Sus scrofa PE=2 SV=1	Pigment epithelium-derived factor	SERPINF1	SERPINF1	Pigment epithelium-derived factor
155	8450	tr|Q0PY11|Q0PY11_PIG	Q0PY11	EEF1A	200	31	12	5	Carbamidomethylation	0	73.128	58.3617	44.982	12.6775	21.5256	14.2126	0	42.21	45.6797	23.7021	38.4026	40.7901	14.5414	5.81841	24.44	2.9092	15.3908	71.4515	100	83.2	16.68:5.89:4.10:1.00:2.98:0.90:0:1.06:4.94:1.11:1.02:0.96:0.70:1.90:0.57:1.54:27.04:35.22:14.83:0:3.86	50141	Elongation factor 1-alpha OS=Sus scrofa GN=EEF1A PE=1 SV=1	Elongation factor 1-alpha	EEF1A	EEF1A	Elongation factor 1-alpha
521	71	Q0QF01|SDHA_PIG	Q0QF01	SDHA	92.54	8	5	5		0	100	0	0	0	0	0	0	0	0	0	0	0	73.9586	0	77.1493	0	84.7432	36.9793	0	0	64.00:-:-:-:-:-:-:-:-:-:-:64.00:-:64.00:-:64.00:64.00:-:-:-:-	72832	Succinate dehydrogenase [ubiquinone] flavoprotein subunit mitochondrial OS=Sus scrofa GN=SDHA PE=1 SV=2	Succinate dehydrogenase [ubiquinone] flavoprotein subunit mitochondrial	SDHA	SDHA	Succinate dehydrogenase [ubiquinone] flavoprotein subunit mitochondrial
373	9033	tr|Q0R678|Q0R678_PIG	Q0R678	PARK7	200	32	4	4		63.8283	83.4472	86.2202	67.8835	0	68.4907	13.1434	6.57172	90.7862	63.2602	66.7509	86.2597	71.9178	61.3537	48.7423	59.4812	0	0	82.3215	100	87.0057	64.00:64.00:64.00:-:64.00:64.00:64.00:64.00:64.00:64.00:64.00:64.00:64.00:64.00:-:-:64.00:64.00:64.00:64.00:64.00	19936	DJ-1 protein OS=Sus scrofa GN=PARK7 PE=2 SV=1	DJ-1 protein	PARK7	PARK7	DJ-1 protein
634	88	Q0Z8U2|RS3_PIG	Q0Z8U2	RPS3	200	24	5	5		0	62.6838	0	0	0	0	0	0	0	0	0	0	0	0.581905	1.16381	34.2102	0	58.4004	59.5351	100	80.1587	64.00:-:-:-:-:-:-:-:-:-:-:64.00:64.00:64.00:-:64.00:64.00:64.00:64.00:-:-	26688	40S ribosomal protein S3 OS=Sus scrofa GN=RPS3 PE=1 SV=1	40S ribosomal protein S3	RPS3	RPS3	40S ribosomal protein S3
130	30	Q19AZ8|THRB_PIG	Q19AZ8	F2	200	29	17	17	Carbamidomethylation; Oxidation (M); Deamidation (NQ)	61.6896	61.6981	52.129	89.0008	31.7511	59.1749	84.3331	15.8756	65.3934	83.4335	45.5248	58.8325	69.7158	71.3881	70.5787	61.3744	75.2653	60.5412	73.4559	79.2047	100	7.74:2.80:56.09:1.00:14.47:39.66:0.30:2.96:43.59:1.77:2.11:16.09:16.95:9.38:22.42:11.14:32.38:15.80:64.00:11.28:15.76	70066	Prothrombin OS=Sus scrofa GN=F2 PE=2 SV=1	Prothrombin	F2	F2	Prothrombin
1317	9396	tr|Q19KE2|Q19KE2_PIG	Q19KE2	FABP5	37.22	16	2	2	Carbamidomethylation	26.0898	67.8604	81.9551	81.0355	65.1509	61.5621	83.6124	67.6437	57.5683	55.0862	100	94.3513	0	75.0307	52.1796	87.178	60.7993	65.4382	79.1988	83.5754	84.257	1.10:2.82:3.48:1.00:1.40:4.36:1.19:0.13:0.40:14.59:3.95:2.13:0.31:7.65:0.62:1.38:5.33:2.53:2.58:0.04:0	13939	Fatty acid binding protein 5 (Fragment) OS=Sus scrofa GN=FABP5 PE=2 SV=1	Fatty acid binding protein 5 (Fragment)	FABP5	FABP5	Fatty acid binding protein 5 (Fragment)
510	9216	tr|Q1T7A9|Q1T7A9_PIG	Q1T7A9	COL6A1	200	46	4	4	Oxidation (M); Deamidation (NQ)	19.3139	33.3768	9.65694	0	0	29.6439	0	0	0	0	0	0	0	0	0	34.3267	0	58.9928	75.9764	88.9701	100	64.00:64.00:-:-:64.00:-:-:-:-:-:-:-:-:64.00:-:64.00:64.00:64.00:64.00:64.00:-	10475	Type VI collagen alpha-1 chain (Fragment) OS=Sus scrofa GN=COL6A1 PE=2 SV=1	Type VI collagen alpha-1 chain (Fragment)	COL6A1	COL6A1	Type VI collagen alpha-1 chain (Fragment)
598	8903	tr|Q1W0S8|Q1W0S8_PIG	Q1W0S8	AEBP1	200	4	4	3	Deamidation (NQ)	0	0	0	64.2012	0	0	0	0	0	49.7165	0	0	0	24.8582	0	49.8846	0	0	87.6771	100	88.821	-:-:64.00:-:-:-:-:-:64.00:-:-:64.00:-:64.00:-:-:64.00:64.00:64.00:-:-	106546	AE binding protein (Fragment) OS=Sus scrofa GN=AEBP1 PE=2 SV=1	AE binding protein (Fragment)	AEBP1	AEBP1	AE binding protein (Fragment)
350	8744	tr|Q1W2G0|Q1W2G0_PIG	Q1W2G0	Sfn	200	21	6	3	Oxidation (M)	70.8381	100	94.9385	0	0	85.2568	0	0	0	0	0	0	87.892	92.7928	0	55.2395	0	27.6198	0	0	0	64.00:64.00:-:-:64.00:-:-:-:-:-:-:64.00:-:64.00:-:64.00:-:-:-:64.00:64.00	27935	14-3-3 sigma protein OS=Sus scrofa GN=Sfn PE=2 SV=1	14-3-3 sigma protein	Sfn	Sfn	14-3-3 sigma protein
357	8669	tr|Q28936|Q28936_PIG	Q28936	FGA	200	19	8	4		0	49.9866	0	89.0029	0	0	63.6154	0	0	100	0	0	70.3934	0	0	3.30918	1.65459	29.3576	89.1413	71.653	99.6284	64.00:-:64.00:-:-:64.00:-:-:64.00:-:-:-:-:64.00:64.00:64.00:64.00:64.00:64.00:-:64.00	47355	Fibrinogen A-alpha-chain (Fragment) OS=Sus scrofa PE=4 SV=1	Fibrinogen A-alpha-chain (Fragment)	FGA	FGA	Fibrinogen A-alpha-chain (Fragment)
622	113	Q28944|CATL1_PIG	Q28944	CTSL	200	19	4	4		39.2657	0	19.6328	94.2253	0	0	77.4249	0	0	92.8282	0	0	81.1471	64.4621	62.8865	61.9419	50.702	63.2038	87.6998	81.9504	100	-:64.00:64.00:-:-:64.00:-:-:64.00:-:-:64.00:64.00:64.00:64.00:64.00:64.00:64.00:64.00:64.00:64.00	37178	Cathepsin L1 OS=Sus scrofa GN=CTSL PE=2 SV=1	Cathepsin L1	CTSL	CTSL	Cathepsin L1
3	18	Q28989|AMBN_PIG	Q28989	AMBN	200	62	68	66	Oxidation (M); Deamidation (NQ); Pyro-glu from Q; Phosphorylation (STY)	38.8091	45.0064	48.9454	0	50.0237	71.2082	75.4965	84.8412	91.7091	0	87.0295	100	0	23.901	43.4338	10.8459	21.8219	21.6918	0	0	0	0.56:0.57:0:1.00:11.99:7.50:19.03:9.05:0:15.59:21.31:0.09:0.56:0.04:0.08:0.12:0:0:0:0.48:0	44927	Ameloblastin 29kDa or larger OS=Sus scrofa GN=AMBN PE=1 SV=1	Ameloblastin 29kDa or larger	AMBN	AMBN	Ameloblastin 29kDa or larger
348	9071	tr|Q29014|Q29014_PIG	Q29014	ORM1	200	22	5	5		59.0714	92.3633	84.323	32.5646	55.425	0	0	11.4194	48.6223	32.8939	76.7554	85.0061	100	80.7719	49.8378	29.4748	55.9085	22.8387	53.3382	70.158	52.9952	6.81:3.17:0.23:1.00:0:0:0.08:0.17:0.28:2.12:1.52:3.64:0.72:0.25:0.95:0.22:1.35:1.11:0.41:1.54:11.83	20899	Alpha-1 acid glycoprotein (Fragment) OS=Sus scrofa PE=2 SV=1	Alpha-1 acid glycoprotein (Fragment)	ORM1	ORM1	Alpha-1 acid glycoprotein (Fragment)
125	17	Q29092|ENPL_PIG	Q29092	HSP90B1	200	26	20	5	Deamidation (NQ)	66.6548	53.1749	32.2853	50.302	41.3711	7.05628	28.5521	100	54.7648	59.0569	95.6596	47.696	14.1126	38.5474	21.624	35.9271	0	52.8089	63.9166	89.7491	82.275	1.79:0.36:1.46:1.00:0.23:0.38:35.91:0.57:2.94:18.60:0.43:0.74:0.29:0.76:0:2.74:6.13:9.74:5.88:6.00:0.18	92471	Endoplasmin OS=Sus scrofa GN=HSP90B1 PE=2 SV=3	Endoplasmin	HSP90B1	HSP90B1	Endoplasmin
163	8438	tr|Q29094|Q29094_PIG	Q29094	PROS	200	26	15	9	Deamidation (NQ)	16.8469	0	0	98.141	0	64.6379	92.6791	0	0	95.8445	0	0	88.5732	33.6938	0	0	0	53.5383	89.9541	92.4609	100	-:-:64.00:-:64.00:64.00:-:-:64.00:-:-:64.00:-:-:-:64.00:64.00:64.00:64.00:64.00:64.00	71915	Protein S (Fragment) OS=Sus scrofa GN=PROS PE=2 SV=1	Protein S (Fragment)	PROS	PROS	Protein S (Fragment)
609	145	Q29095|PTGDS_PIG	Q29095	PTGDS	200	23	3	3	Deamidation (NQ)	43.1344	0	12.6219	86.9952	33.6989	0	83.2202	0	0	100	0	46.4232	38.7677	42.2829	57.7189	45.3638	71.6539	25.2437	85.2162	81.8116	70.5079	0:0.15:31.87:1.00:0:24.51:0:0:64.00:0:0.69:1.58:5.05:2.36:12.29:0.76:50.83:12.92:5.75:2.38:1.37	20568	Prostaglandin-H2 D-isomerase OS=Sus scrofa GN=PTGDS PE=1 SV=1	Prostaglandin-H2 D-isomerase	PTGDS	PTGDS	Prostaglandin-H2 D-isomerase
216	11	Q29116|TENA_PIG	Q29116	TNC	200	14	14	4		0	0	0	64.0204	0	0	60.4265	0	0	62.2907	0	0	35.8982	0	0	17.9491	0	40.2089	58.8674	57.4108	100	-:-:64.00:-:-:64.00:-:-:64.00:-:-:-:-:64.00:-:64.00:64.00:64.00:64.00:-:64.00	191399	Tenascin OS=Sus scrofa GN=TNC PE=1 SV=1	Tenascin	TNC	TNC	Tenascin
499	123	Q29122|MYO6_PIG	Q29122	MYO6	52.86	3	3	3		86.3474	100	0	0	0	0	0	0	0	0	0	0	0	93.0287	0	25.7692	0	51.5384	89.0502	0	0	64.00:-:-:-:-:-:-:-:-:-:-:64.00:-:64.00:-:64.00:64.00:-:-:64.00:-	144858	Unconventional myosin-VI OS=Sus scrofa GN=MYO6 PE=1 SV=1	Unconventional myosin-VI	MYO6	MYO6	Unconventional myosin-VI
1149	11429	tr|Q29194|Q29194_PIG	Q29194	RPS2	44.71	16	2	2		0	0	0	0	0	0	0	0	0	0	0	0	0	0	0	0	0	100	99.8042	49.9021	0	-:-:-:-:-:-:-:-:-:-:-:-:-:-:-:64.00:64.00:64.00:-:-:-	9163	Ribosomal protein S2 (Fragment) OS=Sus scrofa PE=2 SV=1	Ribosomal protein S2 (Fragment)	RPS2	RPS2	Ribosomal protein S2 (Fragment)
480	72	Q29214|RLA0_PIG	Q29214	RPLP0	200	32	5	5		0	74.9173	0	0	0	0	86.2911	53.1326	0	0	76.4658	0	0	26.5663	0	61.3496	0	77.7633	84.1391	100	76.6104	64.00:-:-:-:-:64.00:64.00:-:-:64.00:-:64.00:-:64.00:-:64.00:64.00:64.00:64.00:-:-	34359	60S acidic ribosomal protein P0 OS=Sus scrofa GN=RPLP0 PE=1 SV=2	60S acidic ribosomal protein P0	RPLP0	RPLP0	60S acidic ribosomal protein P0
918	172	Q29361|RL35_PIG	Q29361	RPL35	200	26	3	3		0	69.7507	0	0	0	0	0	0	0	0	0	0	0	33.3229	0	0	0	66.6459	66.7197	100	72.957	64.00:-:-:-:-:-:-:-:-:-:-:64.00:-:-:-:64.00:64.00:64.00:64.00:-:-	14549	60S ribosomal protein L35 OS=Sus scrofa GN=RPL35 PE=1 SV=3	60S ribosomal protein L35	RPL35	RPL35	60S ribosomal protein L35
379	127	Q29545|ICA_PIG	Q29545	ICA	200	7	4	3	Deamidation (NQ)	81.223	20.0182	58.3704	93.0916	0	0	89.9638	0	0	100	0	0	82.3219	87.2267	72.2999	67.6841	0	60.0741	58.5891	40.0364	72.9856	64.00:64.00:64.00:-:-:64.00:-:-:64.00:-:-:64.00:64.00:64.00:-:64.00:64.00:64.00:64.00:64.00:64.00	77634	Inhibitor of carbonic anhydrase OS=Sus scrofa GN=ICA PE=1 SV=1	Inhibitor of carbonic anhydrase	ICA	ICA	Inhibitor of carbonic anhydrase
85	25	Q29549|CLUS_PIG	Q29549	CLU	200	36	19	19	Oxidation (M); Deamidation (NQ)	55.5142	64.5217	62.683	76.4562	30.9701	38.6258	59.2635	15.485	67.5544	82.121	52.423	61.1232	75.5382	60.5828	46.3064	60.8018	57.2604	56.5345	84.9685	90.8301	100	29.54:17.68:64.00:1.00:4.33:16.47:0.19:11.82:64.00:6.18:6.95:19.87:4.94:24.74:14.69:19.94:64.00:64.00:64.00:16.62:64.00	51775	Clusterin OS=Sus scrofa GN=CLU PE=1 SV=1	Clusterin	CLU	CLU	Clusterin
648	109	Q29554|ECHA_PIG	Q29554	HADHA	120.02	6	3	3	Deamidation (NQ)	0	93.3183	0	80.8817	0	0	69.7355	0	0	100	0	0	86.0673	0	0	34.8677	71.1156	89.5452	98.0336	0	0	64.00:-:64.00:-:-:64.00:-:-:64.00:-:-:-:-:64.00:64.00:64.00:64.00:-:-:-:64.00	83107	Trifunctional enzyme subunit alpha mitochondrial OS=Sus scrofa GN=HADHA PE=1 SV=1	Trifunctional enzyme subunit alpha mitochondrial	HADHA	HADHA	Trifunctional enzyme subunit alpha mitochondrial
290	8906	tr|Q29568|Q29568_PIG	Q29568	ENO3	200	37	3	2		89.4478	100	99.0265	57.1473	0	71.0776	72.3196	0	0	0	0	0	95.4917	0	28.5737	0	0	62.4201	86.2758	89.4213	0	64.00:64.00:64.00:-:64.00:64.00:-:-:-:-:-:-:64.00:-:-:64.00:64.00:64.00:-:64.00:64.00	16104	Phosphopyruvate hydratase (Fragment) OS=Sus scrofa PE=2 SV=1	Phosphopyruvate hydratase (Fragment)	ENO3	ENO3	Phosphopyruvate hydratase (Fragment)
175	8471	tr|Q2A6Z6|Q2A6Z6_PIG	Q2A6Z6	K6-irs1	200	29	13	5	Deamidation (NQ)	0	36.2405	0	0	0	0	0	0	0	0	0	0	0	81.2034	0	100	0	72.481	0	0	0	64.00:-:-:-:-:-:-:-:-:-:-:64.00:-:64.00:-:64.00:-:-:-:-:-	51272	K6-irs1 keratin (Fragment) OS=Sus scrofa GN=K6-irs1 PE=2 SV=1	K6-irs1 keratin (Fragment)	K6-irs1	K6-irs1	K6-irs1 keratin (Fragment)
391	158	Q2EN75|S10A6_PIG	Q2EN75	S100A6	200	27	3	3		6.44081	100	87.1894	0	15.04	57.7759	0	0	0	0	0	0	70.6174	86.3217	12.8816	73.7015	13.8228	72.3254	35.1316	86.2412	33.8444	38.37:15.80:0:1.00:13.08:0:0:0:0:0:0:21.29:0.89:14.69:0.87:17.44:3.72:11.75:1.08:0.85:11.69	10060	Protein S100-A6 OS=Sus scrofa GN=S100A6 PE=3 SV=1	Protein S100-A6	S100A6	S100A6	Protein S100-A6
433	101	Q2EN76|NDKB_PIG	Q2EN76	NME2	200	43	6	6		49.3985	100	92.5081	83.3428	4.73303	67.6441	53.6275	0	76.3909	72.5555	26.62	73.5574	61.2622	19.6253	9.46606	38.3289	80.54	24.6106	63.9483	88.7376	14.9141	18.45:10.60:10.51:1.00:14.63:4.03:0:2.51:8.70:1.30:2.65:1.42:1.14:3.13:10.54:2.55:10.13:7.25:0.65:5.27:5.99	17176	Nucleoside diphosphate kinase B OS=Sus scrofa GN=NME2 PE=2 SV=1	Nucleoside diphosphate kinase B	NME2	NME2	Nucleoside diphosphate kinase B
601	129	Q2EN81|ATPO_PIG	Q2EN81	ATP5O	200	30	4	4	Carbamidomethylation; Deamidation (NQ)	42.0644	100	21.34	53.8819	20.5538	0	0	0	0	17.2422	0	0	40.0068	37.5966	8.62111	62.3218	0	73.0246	63.7307	65.2497	44.9219	64.00:0.66:5.95:1.00:0:0:0:0:0.81:0:0:2.38:0.49:12.35:0:29.19:19.09:6.69:1.95:4.43:3.04	23370	ATP synthase subunit O mitochondrial OS=Sus scrofa GN=ATP5O PE=1 SV=1	ATP synthase subunit O mitochondrial	ATP5O	ATP5O	ATP synthase subunit O mitochondrial
419	91	Q2YGT9|RL6_PIG	Q2YGT9	RPL6	200	19	4	4	Deamidation (NQ)	0	100	45.0483	0	0	0	0	0	0	11.8505	5.92525	0	28.2457	0	0	84.7489	0	95.3524	81.8831	64.444	50.818	64.00:64.00:-:-:-:-:-:-:64.00:64.00:-:-:-:64.00:-:64.00:64.00:64.00:64.00:-:64.00	32190	60S ribosomal protein L6 OS=Sus scrofa GN=RPL6 PE=1 SV=3	60S ribosomal protein L6	RPL6	RPL6	60S ribosomal protein L6
1131	9250	tr|Q2YHQ3|Q2YHQ3_PIG	Q2YHQ3	FLNA	200	25	3	3		0	74.6726	20.2084	85.7831	10.1042	0	0	0	0	0	0	0	0	46.566	0	41.2602	36.6521	21.3561	85.6566	100	0	61.91:1.22:64.00:1.00:0:0:0:0:0:0:0:9.83:0:8.40:5.35:2.84:64.00:64.00:0:0:0	17751	Filamin-A (Fragment) OS=Sus scrofa GN=FLNA PE=1 SV=1	Filamin-A (Fragment)	FLNA	FLNA	Filamin-A (Fragment)
778	195	Q3BDI7|DSG1_PIG	Q3BDI7	DSG1	200	3	2	2	Oxidation (M)	9.40085	7.68401	30.0655	87.1874	3.84201	0	83.0219	0	0	82.9521	0	0	0	38.0192	20.7017	16.0976	78.827	62.9529	78.3557	90.1083	100	1.17:5.08:64.00:1.00:0:64.00:0:0:64.00:0:0:13.46:3.77:2.83:64.00:64.00:64.00:64.00:64.00:1.95:0	113318	Desmoglein-1 OS=Sus scrofa GN=DSG1 PE=2 SV=1	Desmoglein-1	DSG1	DSG1	Desmoglein-1
666	173	Q4GWZ2|RSSA_PIG	Q4GWZ2	RPSA	200	15	3	3		25.0908	61.3812	41.1605	49.582	29.7462	48.7036	58.7345	50.6566	0	0	0	0	0	50.2121	12.5454	40.1642	58.9282	65.4833	74.3843	100	74.9105	6.31:1.29:2.94:1.00:6.39:5.20:3.55:0:0:0:0:3.20:0.33:2.06:5.79:12.83:25.32:40.98:8.09:0.93:0	32928	40S ribosomal protein SA OS=Sus scrofa GN=RPSA PE=1 SV=3	40S ribosomal protein SA	RPSA	RPSA	40S ribosomal protein SA
291	8941	tr|Q4TTS4|Q4TTS4_PIG	Q4TTS4	HIST12H	200	18	7	2	Deamidation (NQ)	0	72.5242	0	0	0	0	0	0	84.9562	0	0	0	0	0	33.6305	77.0769	0	80.1997	67.2611	100	89.7551	64.00:-:-:-:-:-:-:64.00:-:-:-:-:64.00:64.00:-:64.00:64.00:64.00:64.00:-:-	21400	Histone H1.2-like protein OS=Sus scrofa PE=3 SV=1	Histone H1.2-like protein	LOC574051	HIST12H	Histone H1.2-like protein
629	8895	tr|Q56P20|Q56P20_PIG	Q56P20	ARF4	200	37	4	2		0	25.5711	0	0	0	0	12.7855	0	0	29.4443	0	0	0	0	0	0	0	41.5511	37.8148	100	45.9421	64.00:-:-:-:-:64.00:-:-:64.00:-:-:-:-:-:-:64.00:64.00:64.00:64.00:-:-	20486	ADP-ribosylation factor 4 OS=Sus scrofa GN=ARF4 PE=1 SV=1	ADP-ribosylation factor 4	ARF4	ARF4	ADP-ribosylation factor 4
139	8597	tr|Q59IP2|Q59IP2_PIG	Q59IP2	COL5A2	200	9	12	11	Carbamidomethylation; Oxidation (M); Deamidation (NQ); HexNAcylation (N)	0	59.01	0	81.7279	3.95916	7.91832	77.2066	0	0	82.6956	0	55.5658	66.6734	0	0	48.6137	62.3654	61.7511	77.7427	80.0237	100	64.00:0:64.00:1.00:2.67:64.00:0:0:64.00:0:19.93:0:0:41.47:64.00:64.00:64.00:64.00:64.00:0:64.00	145245	Procollagen alpha 2(V) OS=Sus scrofa GN=COL5A2 PE=2 SV=1	Procollagen alpha 2(V)	COL5A2	COL5A2	Procollagen alpha 2(V)
96	8373	tr|Q59IP3|Q59IP3_PIG	Q59IP3	COL5A1	200	12	18	12	Carbamidomethylation; Oxidation (M); Deamidation (NQ); Pyro-glu from Q	0	0	0	84.5315	0	0	69.4626	0	0	83.7156	0	0	58.8355	5.1197	0	0	10.2394	0	69.542	64.8343	100	-:-:64.00:-:-:64.00:-:-:64.00:-:-:64.00:-:-:64.00:-:64.00:64.00:64.00:-:64.00	183904	Procollagen alpha 1(V) OS=Sus scrofa GN=COL5A1 PE=2 SV=1	Procollagen alpha 1(V)	COL5A1	COL5A1	Procollagen alpha 1(V)
249	45	Q5S1U1|HSPB1_PIG	Q5S1U1	HSPB1	200	70	9	7	Pyro-glu from Q	10.5298	95.6434	54.6595	0	0	50.5622	0	0	0	0	0	0	70.8835	5.26491	34.2943	95.679	29.8961	80.5126	60.7174	100	57.1458	64.00:64.00:-:-:64.00:-:-:-:-:-:-:64.00:64.00:64.00:64.00:64.00:64.00:64.00:64.00:64.00:64.00	22942	Heat shock protein beta-1 OS=Sus scrofa GN=HSPB1 PE=2 SV=1	Heat shock protein beta-1	HSPB1	HSPB1	Heat shock protein beta-1
1054	302	Q5S3G4|COX5B_PIG	Q5S3G4	COX5B	200	23	3	3	Deamidation (NQ)	0	100	0	0	0	0	0	0	0	0	0	0	0	75.6358	0	37.8179	0	78.2023	0	0	0	64.00:-:-:-:-:-:-:-:-:-:-:64.00:-:64.00:-:64.00:-:-:-:-:-	13783	Cytochrome c oxidase subunit 5B mitochondrial OS=Sus scrofa GN=COX5B PE=2 SV=1	Cytochrome c oxidase subunit 5B mitochondrial	COX5B	COX5B	Cytochrome c oxidase subunit 5B mitochondrial
33	12	Q6QAQ1|ACTB_PIG	Q6QAQ1	ACTB	200	65	23	11	Carbamidomethylation; Oxidation (M); Deamidation (NQ); Pyro-glu from Q; HexNAcylation (N)	29.0789	85.0407	65.4046	35.8477	25.3209	57.4632	27.2722	10.0362	72.9928	40.8916	48.0074	61.8026	57.787	36.8347	20.0724	60.1605	30.6398	63.2633	73.2648	100	40.3047	41.00:8.37:1.66:1.00:15.47:0.95:0.36:5.47:2.69:2.81:3.05:1.85:0.70:10.14:1.30:15.67:33.59:60.75:1.23:1.60:7.95	41737	Actin cytoplasmic 1 OS=Sus scrofa GN=ACTB PE=1 SV=2	Actin cytoplasmic 1	ACTB	ACTB	Actin cytoplasmic 1
896	9207	tr|Q6QAS5|Q6QAS5_PIG	Q6QAS5	RPL12	63.9	13	2	2	Carbamidomethylation	0	54.4757	0	0	0	0	0	29.4095	100	0	0	96.2841	0	0	0	14.7048	0	38.3379	46.6387	94.8692	67.7842	64.00:-:-:-:-:-:64.00:64.00:-:-:64.00:-:-:64.00:-:64.00:64.00:64.00:64.00:-:-	20810	60S ribosomal protein L12 (Fragment) OS=Sus scrofa GN=RPL12 PE=1 SV=1	60S ribosomal protein L12 (Fragment)	RPL12	RPL12	60S ribosomal protein L12 (Fragment)
915	10381	tr|Q6QR67|Q6QR67_PIG	Q6QR67	RETN	200	13	2	2	Deamidation (NQ)	46.6968	0	0	0	0	0	0	0	0	0	0	0	0	93.3935	0	100	0	0	0	0	0	-:-:-:-:-:-:-:-:-:-:-:64.00:-:64.00:-:-:-:-:-:64.00:-	11693	Resistin OS=Sus scrofa GN=RETN PE=1 SV=1	Resistin	RETN	RETN	Resistin
900	244	Q6RVA9|CAV1_PIG	Q6RVA9	CAV1	36.84	16	2	2		0	0	0	0	0	0	0	0	0	0	0	0	0	0	0	0	0	88.4718	44.2359	100	0	-:-:-:-:-:-:-:-:-:-:-:-:-:-:-:64.00:64.00:64.00:-:-:-	20625	Caveolin-1 OS=Sus scrofa GN=CAV1 PE=2 SV=1	Caveolin-1	CAV1	CAV1	Caveolin-1
797	8938	tr|Q6UAQ9|Q6UAQ9_PIG	Q6UAQ9	ETFA	200	28	4	4	Pyro-glu from Q	0	44.2798	8.43809	0	0	0	0	0	0	0	0	0	55.244	60.0572	0	44.493	4.21905	62.677	24.8147	72.6481	100	64.00:64.00:-:-:-:-:-:-:-:-:-:64.00:-:64.00:64.00:64.00:64.00:64.00:64.00:-:64.00	32884	Electron transfer flavoprotein alpha subunit (Fragment) OS=Sus scrofa GN=ETFA PE=2 SV=1	Electron transfer flavoprotein alpha subunit (Fragment)	ETFA	ETFA	Electron transfer flavoprotein alpha subunit (Fragment)
865	9247	tr|Q6UJZ1|Q6UJZ1_PIG	Q6UJZ1	GPX3	200	47	3	3	Deamidation (NQ)	0.817867	0	0	100	1.63573	0	0	0	0	89.7776	0	0	69.3586	31.664	34.8175	40.6591	54.9444	55.7721	82.4556	73.0259	0	0:0:64.00:1.00:0:0:0:0:64.00:0:0:7.15:9.93:16.22:37.89:58.45:64.00:64.00:0:1.18:64.00	12976	Glutathione peroxidase 3 (Fragment) OS=Sus scrofa GN=GPX3 PE=2 SV=2	Glutathione peroxidase 3 (Fragment)	GPX3	GPX3	Glutathione peroxidase 3 (Fragment)
211	61	Q711S8|SPP24_PIG	Q711S8	SPP2	200	41	10	2	Deamidation (NQ)	15.717	72.5209	60.431	82.988	36.6615	0	70.6939	37.9605	37.9759	88.6202	37.1605	38.9822	77.4307	0	43.9937	66.8619	58.139	87.7157	88.1993	100	31.434	11.45:3.50:23.83:1.00:0:9.75:1.05:0.28:41.77:0.67:0.34:0:1.67:9.42:4.34:53.67:62.40:47.02:0.32:0.28:18.45	23097	Secreted phosphoprotein 24 OS=Sus scrofa GN=SPP2 PE=2 SV=1	Secreted phosphoprotein 24	SPP2	SPP2	Secreted phosphoprotein 24
1151	10054	tr|Q71K49|Q71K49_PIG	Q71K49	ATP8	25.06	39	2	2		0	98.6966	68.0747	0	0	0	0	0	0	0	0	0	34.0373	0	0	90.793	0	100	0	0	0	64.00:64.00:-:-:-:-:-:-:-:-:-:-:-:64.00:-:64.00:-:-:-:-:64.00	7911	ATP synthase protein 8 OS=Sus scrofa GN=ATP8 PE=3 SV=1	ATP synthase protein 8	ATP8	ATP8	ATP synthase protein 8
109	14	Q767L7|TBB5_PIG	Q767L7	TUBB	200	46	18	3	Oxidation (M); Deamidation (NQ)	38.7309	78.6954	48.103	6.00597	12.0119	28.4639	0	39.9574	55.1722	64.9327	49.3197	73.1845	48.3188	26.366	0	61.8597	0	70.7375	82.8222	100	90.0911	64.00:13.66:0.50:1.00:7.88:0:10.38:9.97:64.00:15.60:53.68:2.98:0:64.00:0:64.00:64.00:64.00:64.00:12.26:21.59	49671	Tubulin beta chain OS=Sus scrofa GN=TUBB PE=2 SV=1	Tubulin beta chain	TUBB	TUBB	Tubulin beta chain
296	65	Q7M2W6|CRYAB_PIG	Q7M2W6	CRYAB	200	71	12	10	Pyro-glu from Q	23.1216	59.5915	40.44	90.164	3.59985	21.9247	83.1732	7.1997	54.4518	87.973	30.7462	52.8458	80.2718	37.8662	16.1845	37.2969	54.9097	53.1013	81.0521	87.193	100	64.00:12.70:64.00:1.00:8.63:64.00:1.28:15.97:64.00:5.93:16.22:14.45:2.73:16.73:61.00:64.00:64.00:64.00:64.00:6.17:64.00	20129	Alpha-crystallin B chain OS=Sus scrofa GN=CRYAB PE=2 SV=1	Alpha-crystallin B chain	CRYAB	CRYAB	Alpha-crystallin B chain
403	8751	tr|Q866S8|Q866S8_PIG	Q866S8	VEGP	200	46	9	9	Deamidation (NQ); Pyro-glu from Q	81.7059	88.626	77.8787	0	0	0	0	0	0	85.4266	0	0	71.9923	90.1467	0	35.9962	0	0	0	100	0	64.00:64.00:-:-:-:-:-:-:64.00:-:-:64.00:-:64.00:-:-:-:64.00:-:64.00:64.00	19368	von Ebner gland protein OS=Sus scrofa PE=2 SV=1	von Ebner gland protein	VEGP	VEGP	von Ebner gland protein
864	9194	tr|Q8HYZ6|Q8HYZ6_PIG	Q8HYZ6	ALPL	200	19	3	3		0	0	0	0	0	0	0	0	79.7663	0	0	0	0	0	0	31.445	0	62.8901	0	93.6087	100	-:-:-:-:-:-:-:64.00:-:-:-:-:-:64.00:-:64.00:-:64.00:64.00:-:-	18683	Alkaline phosphatase (Fragment) OS=Sus scrofa PE=2 SV=1	Alkaline phosphatase (Fragment)	ALPL	ALPL	Alkaline phosphatase (Fragment)
292	176	Q8MJ39|MGP_PIG	Q8MJ39	MGP	200	34	5	5	Oxidation (M); Deamidation (NQ)	0	0	75.8375	92.1132	0	0	78.715	0	50.6282	74.7188	0	0	0	19.0085	0	0	0	38.017	53.6064	100	0	-:64.00:64.00:-:-:64.00:-:64.00:64.00:-:-:64.00:-:-:-:64.00:64.00:64.00:-:-:-	12142	Matrix Gla protein OS=Sus scrofa GN=MGP PE=3 SV=1	Matrix Gla protein	MGP	MGP	Matrix Gla protein
171	20	Q8WNW3|PLAK_PIG	Q8WNW3	Jup	200	23	13	13	Carbamidomethylation; Deamidation (NQ)	25.7364	54.4763	48.7171	85.4649	56.1201	31.2775	98.0121	69.9599	100	72.8812	76.1254	96.5923	39.931	40.2845	28.3371	39.9477	28.1269	51.474	0	51.9025	12.8682	0.76:0.35:7.99:1.00:0.29:20.80:2.75:7.25:3.54:2.99:6.48:0.26:0.12:0.31:0.11:0.94:0:0.35:0.02:0.12:0.28	81850	Junction plakoglobin OS=Sus scrofa GN=Jup PE=2 SV=1	Junction plakoglobin	Jup	Jup	Junction plakoglobin
1200	139	Q95250|PGRC1_PIG	Q95250	PGRMC1	74.51	22	3	3	Phosphorylation (STY)	1.90266	96.5995	18.2785	57.2889	0	34.0056	40.7592	12.519	78.1588	0	71.4145	100	0	3.80532	0	0	0	25.5023	0	0	0	64.00:64.00:64.00:-:64.00:64.00:64.00:64.00:-:64.00:64.00:64.00:-:-:-:64.00:-:-:-:64.00:-	21609	Membrane-associated progesterone receptor component 1 OS=Sus scrofa GN=PGRMC1 PE=1 SV=3	Membrane-associated progesterone receptor component 1	PGRMC1	PGRMC1	Membrane-associated progesterone receptor component 1
580	8992	tr|Q95ME5|Q95ME5_PIG	Q95ME5	SOD1	200	39	4	4	Oxidation (M)	58.7268	100	90.8276	71.3256	60.0995	85.6949	13.877	0	79.3403	0	27.754	72.0866	81.5	77.7113	69.8444	57.3226	63.7305	35.3935	0	36.8967	0	7.08:3.18:1.52:1.00:7.48:0.07:0:0.69:0:0.12:0.55:2.23:1.64:0.92:1.12:0.37:0:0.14:0:1.17:3.02	15246	Superoxide dismutase 1 (Fragment) OS=Sus scrofa GN=SOD1 PE=2 SV=1	Superoxide dismutase 1 (Fragment)	SOD1	SOD1	Superoxide dismutase 1 (Fragment)
670	9319	tr|Q9GJX2|Q9GJX2_PIG	Q9GJX2	DBI	200	44	2	2	Oxidation (M); Pyro-glu from Q	0	0	0	0	0	0	0	0	0	0	0	0	0	15.4698	57.2308	30.9395	0	34.6656	0	100	0	-:-:-:-:-:-:-:-:-:-:-:64.00:64.00:64.00:-:64.00:-:64.00:-:-:-	8807	Diazepam binding inhibitor (Fragment) OS=Sus scrofa GN=DBI PE=2 SV=1	Diazepam binding inhibitor (Fragment)	DBI	DBI	Diazepam binding inhibitor (Fragment)
320	31	Q9GL01|RPN2_PIG	Q9GL01	RPN2	200	31	10	5	Deamidation (NQ)	0	79.7069	0	0	0	0	0	0	0	0	0	0	0	0	0	29.1054	0	60.0576	58.2108	100	0	64.00:-:-:-:-:-:-:-:-:-:-:-:-:64.00:-:64.00:64.00:64.00:-:-:-	69274	Dolichyl-diphosphooligosaccharide--protein glycosyltransferase subunit 2 OS=Sus scrofa GN=RPN2 PE=2 SV=1	Dolichyl-diphosphooligosaccharide--protein glycosyltransferase subunit 2	RPN2	RPN2	Dolichyl-diphosphooligosaccharide--protein glycosyltransferase subunit 2
1395	10108	tr|Q9GLW8|Q9GLW8_PIG	Q9GLW8	PRDX5	54.92	16	2	2		0	96.7303	50.6781	0	0	0	0	0	0	0	0	0	19.3261	68.6068	0	0	0	100	45.7713	38.6521	0	64.00:64.00:-:-:-:-:-:-:-:-:-:64.00:-:-:-:64.00:64.00:64.00:-:-:64.00	17324	Peroxiredoxin 5 OS=Sus scrofa GN=PRDX5 PE=2 SV=1	Peroxiredoxin 5	PRDX5	PRDX5	Peroxiredoxin 5
93	8394	tr|Q9GMA6|Q9GMA6_PIG	Q9GMA6	SERPINA3-2	200	52	21	13	Oxidation (M); Deamidation (NQ); HexNAcylation (N)	87.673	99.2873	67.8194	37.1828	38.8399	49.9627	18.5914	0	0	0	50.1011	0	75.4041	97.1936	95.3055	81.8497	100	78.1307	61.7037	97.2241	64.0816	12.26:2.24:0.78:1.00:3.16:0.34:0:0:0:1.06:0:11.41:11.78:7.07:13.57:7.58:4.14:6.33:1.42:10.70:4.86	46645	Alpha-1-antichymotrypsin 2 OS=Sus scrofa GN=SERPINA3-2 PE=1 SV=1	Alpha-1-antichymotrypsin 2	SERPINA3-2	SERPINA3-2	Alpha-1-antichymotrypsin 2
378	48	Q9GMB0|RPN1_PIG	Q9GMB0	RPN1	200	18	9	9		0	80.6813	0	0	0	0	0	0	0	0	0	0	0	0	0	26.3424	0	52.6848	68.1213	100	66.7322	64.00:-:-:-:-:-:-:-:-:-:-:-:-:64.00:-:64.00:64.00:64.00:64.00:-:-	68695	Dolichyl-diphosphooligosaccharide--protein glycosyltransferase subunit 1 OS=Sus scrofa GN=RPN1 PE=1 SV=1	Dolichyl-diphosphooligosaccharide--protein glycosyltransferase subunit 1	RPN1	RPN1	Dolichyl-diphosphooligosaccharide--protein glycosyltransferase subunit 1
343	46	Q9MZ15|VDAC2_PIG	Q9MZ15	VDAC2	200	36	10	9	Carbamidomethylation	0	100	1.9428	0	0	0	0	0	0	0	0	0	0	0.971399	0	66.2933	0	72.5345	9.68419	82.5421	63.8844	64.00:64.00:-:-:-:-:-:-:-:-:-:64.00:-:64.00:-:64.00:64.00:64.00:64.00:-:-	31593	Voltage-dependent anion-selective channel protein 2 OS=Sus scrofa GN=VDAC2 PE=2 SV=1	Voltage-dependent anion-selective channel protein 2	VDAC2	VDAC2	Voltage-dependent anion-selective channel protein 2
330	38	Q9MZ16|VDAC1_PIG	Q9MZ16	VDAC1	200	56	13	12	Deamidation (NQ)	17.2078	74.0157	22.8624	100	19.7117	29.1716	0	0	44.3368	0	0	0	0	28.0046	8.60389	49.7754	35.5284	56.587	20.4132	28.7279	0	64.00:0.83:64.00:1.00:4.49:0:0:2.23:0:0:0:1.84:0.37:15.38:3.76:35.62:1.61:1.08:0:1.00:0	30727	Voltage-dependent anion-selective channel protein 1 OS=Sus scrofa GN=VDAC1 PE=2 SV=3	Voltage-dependent anion-selective channel protein 1	VDAC1	VDAC1	Voltage-dependent anion-selective channel protein 1
698	138	Q9N0F1|ODO2_PIG	Q9N0F1	DLST	200	12	5	5		39.6285	100	39.4279	55.1216	0	1.49465	46.824	0	77.6178	52.2546	68.8596	92.6633	51.0592	0	53.8396	73.024	2.9893	74.9376	0	0	0	64.00:64.00:64.00:-:64.00:64.00:-:64.00:64.00:64.00:64.00:-:64.00:64.00:64.00:64.00:-:-:-:64.00:64.00	48977	Dihydrolipoyllysine-residue succinyltransferase component of 2-oxoglutarate dehydrogenase complex mitochondrial OS=Sus scrofa GN=DLST PE=1 SV=1	Dihydrolipoyllysine-residue succinyltransferase component of 2-oxoglutarate dehydrogenase complex mitochondrial	DLST	DLST	Dihydrolipoyllysine-residue succinyltransferase component of 2-oxoglutarate dehydrogenase complex mitochondrial
40	8763	tr|Q9TQY3|Q9TQY3_PIG	Q9TQY3	AMELX	200	53	32	4	Oxidation (M); Deamidation (NQ); Pyro-glu from Q; Phosphorylation (STY)	18.213	53.5637	0	0	0	0	0	36.4259	47.0547	0	41.2539	49.5328	0	0	0	72.5137	0	100	0	90.6147	0	64.00:-:-:-:-:-:64.00:64.00:-:64.00:64.00:-:-:64.00:-:64.00:-:64.00:-:64.00:-	21505	27 kDa amelogenin OS=Sus scrofa PE=1 SV=1	27 kDa amelogenin	AMELX	AMELX	27 kDa amelogenin
255	36	Q9TSX9|PRDX6_PIG	Q9TSX9	PRDX6	200	58	12	12	Carbamidomethylation; Oxidation (M); Deamidation (NQ)	63.8951	86.6425	85.6765	75.0691	50.1281	74.4826	77.1273	79.8456	97.9116	72.0154	84.0789	100	81.6968	71.8535	25.064	60.2245	68.8994	94.0468	73.7101	78.1817	80.8575	64.00:49.29:17.97:1.00:38.60:23.11:36.72:64.00:14.42:41.72:64.00:12.67:0.05:3.69:9.23:64.00:27.43:15.23:20.31:6.80:46.96	25037	Peroxiredoxin-6 OS=Sus scrofa GN=PRDX6 PE=2 SV=3	Peroxiredoxin-6	PRDX6	PRDX6	Peroxiredoxin-6
693	9064	tr|Q9TUF6|Q9TUF6_PIG	Q9TUF6	LCTHIO	153.53	9	3	3		27.1938	88.8983	53.9303	99.3829	45.9447	13.5969	100	0	0	92.6799	80.533	0	86.7666	0	0	90.3234	0	79.4249	91.8591	68.7414	68.2819	64.00:1.75:64.00:1.00:0.03:64.00:0:0:64.00:55.28:0:0:0:64.00:0:64.00:64.00:9.12:8.26:0.11:64.00	47586	Long-chain 3-ketoacyl-CoA thiolase OS=Sus scrofa GN=LCTHIO PE=2 SV=1	Long-chain 3-ketoacyl-CoA thiolase	LCTHIO	LCTHIO	Long-chain 3-ketoacyl-CoA thiolase
750	156	Q9TUQ3|CO7_PIG	Q9TUQ3	C7	200	5	3	3		0	95.5738	0	100	0	0	75.3247	0	0	96.9704	0	97.9539	0	0	0	45.9094	22.9547	76.8593	66.6921	89.8798	0	64.00:-:64.00:-:-:64.00:-:-:64.00:-:64.00:-:-:64.00:64.00:64.00:64.00:64.00:-:-:-	93062	Complement component C7 OS=Sus scrofa GN=C7 PE=1 SV=1	Complement component C7	C7	C7	Complement component C7
128	29	Q9XSD9|PGS2_PIG	Q9XSD9	DCN	200	46	15	14	Carbamidomethylation; Oxidation (M); Deamidation (NQ)	26.6168	58.9651	14.5831	55.6855	0	0	54.9498	0	0	44.2025	7.29154	0	34.9192	44.7637	28.0424	50.3188	35.0336	58.2911	62.3624	90.2244	100	64.00:64.00:64.00:-:-:64.00:-:-:64.00:64.00:-:64.00:64.00:64.00:64.00:64.00:64.00:64.00:64.00:64.00:64.00	39899	Decorin OS=Sus scrofa GN=DCN PE=2 SV=1	Decorin	DCN	DCN	Decorin
162	8977	tr|Q9XSN6|Q9XSN6_PIG	Q9XSN6	KLK4	200	26	11	11	Carbamidomethylation; Oxidation (M); Deamidation (NQ)	80.5535	79.5599	68.2575	68.5642	86.2672	71.4426	20.3677	40.7354	67.445	0	0	0	72.0428	82.5559	100	78.0243	82.6199	74.8196	67.5765	66.5761	45.5298	0.47:0.13:0.17:1.00:0.51:0.02:0.02:0.05:0:0:0:0.63:3.36:0.51:0.66:0.48:0.28:0.08:0.02:0.75:0.27	27235	Enamel matrix serine proteinase 1 OS=Sus scrofa GN=KLK4 PE=2 SV=1	Enamel matrix serine proteinase 1	KLK4	KLK4	Enamel matrix serine proteinase 1
737	9177	tr|U3GT97|U3GT97_PIG	U3GT97	FSTL1	200	13	3	3	Deamidation (NQ); Phosphorylation (STY)	52.2655	22.8148	72.1295	100	16.5111	0	13.3787	0	0	89.1589	0	0	18.9357	46.2645	68.2177	15.4735	65.8293	40.3217	6.68937	0	0	1.45:63.53:64.00:1.00:0:0.64:0:0:64.00:0:0:10.41:64.00:0.98:55.38:9.72:0.67:0:0:24.42:1.19	34870	follistatin like 1 OS=Sus scrofa PE=2 SV=1	follistatin like 1	FSTL1	FSTL1	follistatin like 1
	Cellular Location Information:
	Overview: The table below shows the number and percent of proteins in this dataset that are annotated to belong to a given cellular location. Proteins are often annotated to occur in multiple locations.
	Technical information: DAVID functional annotation tool used, functional annotation table selected, output is 465 records from 478 DAVID IDs.
	Total coverage:		Secreted or Extracellular		Membrane		Actin or Cytoskeletal		Cytosol		Mitochondrial
	0.84392		Count:		Count:		Count:		Count:		Count:
			308		208		68		165		82
			Percent:		Percent:		Percent:		Percent:		Percent:
			0.662366		0.447312		0.146237		0.354839		0.176344
	Functional Enrichment Information:
	Overview: DAVID online resources functional annotation charts for the 90% most abundant proteins in each of each location cluster (defined by Fig. 2). Top ten most significant results are shown.
	DEJ DAVID functional annotation chart: top ten results					Secretion DAVID functional annotation chart: top ten results					Maturation DAVID functional annotation chart: top ten results					Cuspal DAVID functional annotation chart: top ten results
	Term	Count	Fold Enrichment	Benjamini		Term	Count	Fold Enrichment	Benjamini		Term	Count	Fold Enrichment	Benjamini		Term	Count	Fold Enrichment	Benjamini
	Extracellular Exosome	155	4.42055	1.43158e-64		Extracellular Exosome	106	4.64964	3.71036e-46		Extracellular Exosome	170	4.6043	6.75868e-75		Extracellular Exosome	203	4.47658	2.99334e-87
	Signal	137	3.11854	7.416e-36		Phosphoprotein	56	7.12688	2.25684e-29		Phosphoprotein	72	5.71966	1.2245e-31		Phosphoprotein	86	5.55749	2.7307e-37
	Extracellular Space	81	4.82027	1.41721e-31		Acetylation	35	7.61856	2.91395e-18		Acetylation	56	7.60885	1.74974e-30		Acetylation	66	7.29487	2.91853e-35
	Phosphoprotein	70	5.80095	2.14e-31		Secreted	41	5.70053	1.99217e-17		Extracellular Space	81	4.57764	8.33473e-30		Myelin Sheath	36	10.9762	1.11926e-24
	Secreted	66	5.97537	2.53972e-30		Myelin Sheath	21	12.736	1.26565e-14		Secreted	62	5.38083	1.04595e-25		Extracellular Space	82	3.77317	4.23897e-24
	Extracellular Matrix	31	15.6193	6.75297e-26		Signal	74	2.58686	1.07581e-13		Myelin Sheath	33	12.3574	3.91395e-24		Extracellular Matrix	31	12.0772	1.32069e-22
	Acetylation	49	6.94529	8.43787e-25		Blood Microparticle	15	18.0374	3.88978e-12		Extracellular Matrix	29	13.8761	1.29178e-22		Secreted	64	4.51835	3.44869e-22
	Disulfide Bond	80	3.70882	1.5779e-23		Extracellular Space	41	3.75266	2.15794e-11		Signal	113	2.46574	1.50961e-19		Focal Adhesion	44	6.64985	1.74182e-21
	Extracellular Matrix	23	18.6433	1.0894e-20		Glycoprotein	29	5.43619	2.20869e-11		Blood Microparticle	22	16.3345	1.86481e-18		Signal	133	2.36082	3.98302e-21
	Proteinaceous Extracellular Matrix	30	9.5802	1.78515e-18		Extracellular Matrix	16	12.399	9.46456e-11		Serine-Type Endopeptidase Inhibitor Activity	22	13.4672	6.77747e-16		Blood Microparticle	22	13.2997	1.20055e-16

## Sheet: 2 - Phosphorylation
	Percentage of peptides belonging to the Amelx splice variants P190 and P173+LRAP that are phosphorylated, per location.
Peptide	Peptide sequence	m3_1A	m3_1B	m3_1C	m3_2A	m3_2B	m3_2C	m3_3A	m3_3B	m3_3C	m3_4A	m3_4B	m3_4C	m2_1A	m2_1B	m2_2A	m2_2B	m2_3A	m2_3B	m2_4A	m2_4B	m2_bone
P190	LPPHPGHPGYINFSYEK	no P190	100	no P190	100	100	0	100	31.9843	0	no P190	91.629	0	no P190	no P190	no P190	100	100	no P190	no P190	no P190	no P190
P173+LRAP	MPLPPHPGHPGYINFSYEVLTPLK	71.7396	94.8924	85.1585	45.0738	93.966	83.4708	91.6178	97.4831	99.2906	85.4342	95.4149	97.1269	81.1346	87.9455	100	100	no P173 or LRAP	97.0537	no P173 or LRAP	100	no P173 or LRAP
